# Supplementary material
Source: publisher site journal article supplement (https://www.spandidos-publications.com/595/downloadSupplementary)
Supplement: Supplementary file 1 [file downloadSupplementary]

## Sheet: WGCNA for bulk
Table SII. Gene network modules in irradiated KYSE-180 by WGCNA.
Genes	kMEbrown	kMEmagenta	kMEsalmon	kMEgrey60	kMElightgreen	kMEblue	kMEred	kMEcyan	kMElightcyan	kMElightyellow	kMEgreenyellow	kMEturquoise	moduleColors	data$gene_short_name
ENSG00000003436	-0.591738	0.13895	0.197234	0.670577	-0.0400477	-0.839209	-0.272068	0.246916	0.629536	-0.239272	0.704607	0.758086	turquoise	TFPI
ENSG00000003989	-0.244175	0.568397	0.283369	0.372846	-0.360687	-0.892009	-0.783807	-0.384254	0.0929918	-0.229837	0.426409	0.930738	turquoise	SLC7A2
ENSG00000006007	0.0607406	0.726204	0.253668	0.106661	-0.377628	-0.684795	-0.902404	-0.668058	-0.159656	-0.167664	0.140552	0.794539	turquoise	GDE1
ENSG00000006118	-0.663925	0.150827	0.00787803	0.503233	-0.234316	-0.964879	-0.532654	0.213709	0.242547	-0.125234	0.832081	0.920209	turquoise	TMEM132A
ENSG00000006283	-0.52178	0.243839	-0.0733117	0.288636	-0.459018	-0.875419	-0.542611	0.13537	0.286405	-0.18814	0.706532	0.869463	turquoise	CACNA1G
ENSG00000007944	-0.270871	0.542517	0.0328341	0.143924	-0.532719	-0.895688	-0.877397	-0.284221	-0.0950613	-0.190127	0.510512	0.971127	turquoise	MYLIP
ENSG00000008086	-0.368218	0.432453	-0.0797034	0.141827	-0.564519	-0.910656	-0.880816	-0.24886	-0.0411109	-0.0203572	0.578035	0.959537	turquoise	CDKL5
ENSG00000008277	0.0257608	0.722645	0.569184	0.398386	-0.05869	-0.722309	-0.750405	-0.541296	-0.248791	-0.432124	0.174371	0.809681	turquoise	ADAM22
ENSG00000008311	-0.0667418	0.728747	0.375331	0.276236	-0.4002	-0.820816	-0.758989	-0.420592	0.0358948	-0.484263	0.297598	0.909872	turquoise	AASS
ENSG00000008323	-0.701841	-0.256915	0.120063	0.754314	0.48918	-0.615131	-0.141216	0.385697	0.0967378	0.173547	0.720831	0.480689	turquoise	PLEKHG6
ENSG00000010810	-0.0819145	0.634854	0.503125	0.442558	-0.0969532	-0.713248	-0.458605	-0.156458	0.206802	-0.685312	0.304512	0.774188	turquoise	FYN
ENSG00000011028	-0.647713	0.162758	0.216288	0.710548	-0.031555	-0.951825	-0.422798	0.186335	0.414528	-0.18892	0.77893	0.876814	turquoise	MRC2
ENSG00000011201	-0.200757	0.477387	0.570138	0.616018	0.066781	-0.754999	-0.562476	-0.341004	-0.0265435	-0.308203	0.321147	0.758673	turquoise	ANOS1
ENSG00000012779	-0.479411	0.382568	0.226622	0.524276	-0.215199	-0.979923	-0.652571	-0.0388482	0.131592	-0.27256	0.673819	0.976708	turquoise	ALOX5
ENSG00000012822	-0.619051	0.224982	0.0279684	0.496741	-0.233542	-0.991933	-0.644546	0.076298	0.205581	-0.0635785	0.794397	0.959611	turquoise	CALCOCO1
ENSG00000013288	-0.360521	0.497965	0.305205	0.490264	-0.207816	-0.957538	-0.735708	-0.199028	0.0271294	-0.299326	0.566791	0.98186	turquoise	MAN2B2
ENSG00000019144	-0.260684	0.553217	0.16362	0.236214	-0.408125	-0.895876	-0.8273	-0.249306	-0.193282	-0.307423	0.503991	0.970499	turquoise	PHLDB1
ENSG00000019485	-0.056659	0.678042	0.18644	0.0771938	-0.457528	-0.755486	-0.783446	-0.306096	-0.214445	-0.470224	0.331042	0.878535	turquoise	PRDM11
ENSG00000019505	-0.184942	0.637213	0.194101	0.216457	-0.454041	-0.887878	-0.882369	-0.392952	-0.101319	-0.277009	0.421945	0.971053	turquoise	SYT13
ENSG00000019582	-0.718838	0.0736839	0.00971117	0.559101	-0.186659	-0.971588	-0.547763	0.172704	0.195627	0.018722	0.846072	0.901942	turquoise	CD74
ENSG00000021762	-0.386229	0.335195	-0.132641	0.127129	-0.501624	-0.798153	-0.618722	0.0403914	0.16967	-0.188957	0.604953	0.836176	turquoise	OSBPL5
ENSG00000022267	-0.245435	0.551297	0.0628774	0.137756	-0.492954	-0.867767	-0.831632	-0.227637	-0.152028	-0.286446	0.500758	0.953252	turquoise	FHL1
ENSG00000026559	0.0758452	0.703721	0.48757	0.280942	-0.0366916	-0.64386	-0.765971	-0.522362	-0.438277	-0.403124	0.142586	0.754942	turquoise	KCNG1
ENSG00000026950	-0.402739	0.441894	0.128066	0.367897	-0.403344	-0.957578	-0.782147	-0.223082	0.10943	-0.13561	0.589333	0.975103	turquoise	BTN3A1
ENSG00000028137	-0.45125	0.387305	0.322408	0.608222	-0.165477	-0.945006	-0.566336	-0.0765552	0.318366	-0.290743	0.609818	0.921331	turquoise	TNFRSF1B
ENSG00000030582	-0.666995	0.155479	0.155321	0.667115	-0.0690053	-0.971654	-0.474566	0.188494	0.349467	-0.1469	0.809886	0.903329	turquoise	GRN
ENSG00000033170	-0.174129	0.628375	0.233515	0.217728	-0.447201	-0.870474	-0.85244	-0.373624	-0.192032	-0.332465	0.408002	0.956291	turquoise	FUT8
ENSG00000037280	-0.478977	0.306207	0.369132	0.667333	0.0552616	-0.909859	-0.540761	0.00290783	0.0148147	-0.283734	0.639802	0.88459	turquoise	FLT4
ENSG00000039068	-0.550134	0.177568	0.333802	0.720301	0.022042	-0.872405	-0.439215	0.00470366	0.244914	-0.123156	0.633163	0.797515	turquoise	CDH1
ENSG00000043591	-0.189661	0.360422	0.431738	0.547079	-0.0765258	-0.581045	-0.250861	-0.195441	0.644571	-0.287477	0.242464	0.540934	turquoise	ADRB1
ENSG00000047617	-0.462581	0.380855	0.0988187	0.394306	-0.330878	-0.947758	-0.654973	0.00385481	0.165694	-0.266965	0.676787	0.960576	turquoise	ANO2
ENSG00000048471	-0.0640316	0.729604	0.333937	0.250943	-0.37062	-0.813514	-0.775259	-0.397536	0.0157836	-0.470204	0.311879	0.910317	turquoise	SNX29
ENSG00000049239	-0.305225	0.550706	0.361148	0.491345	-0.197456	-0.934265	-0.700294	-0.201052	0.0675687	-0.400556	0.522775	0.969004	turquoise	H6PD
ENSG00000049246	-0.0638483	0.712529	0.206969	0.118813	-0.497027	-0.800557	-0.828227	-0.395156	-0.0750548	-0.412394	0.323185	0.912778	turquoise	PER3
ENSG00000049323	-0.50157	0.330654	0.146584	0.476951	-0.204553	-0.972095	-0.736875	-0.0936006	-0.0318699	-0.104199	0.684138	0.968668	turquoise	LTBP1
ENSG00000049540	-0.53714	0.164013	-0.175097	0.190973	-0.368104	-0.849769	-0.702042	0.0800863	-0.247744	0.0199375	0.728887	0.864046	turquoise	ELN
ENSG00000050555	-0.422402	0.0740343	0.447334	0.734167	0.396437	-0.619096	-0.259142	0.0598451	-0.0965997	-0.142644	0.474503	0.549576	turquoise	LAMC3
ENSG00000050767	-0.427101	0.420118	0.331415	0.576847	-0.172152	-0.957739	-0.634465	-0.122154	0.158969	-0.295486	0.600784	0.950554	turquoise	COL23A1
ENSG00000052344	-0.814243	-0.0646135	-0.0911103	0.600212	-0.0833907	-0.943781	-0.481025	0.277421	0.305533	0.174207	0.914729	0.841423	turquoise	PRSS8
ENSG00000053254	-0.17341	0.636072	0.173395	0.170763	-0.511134	-0.873464	-0.874476	-0.382854	-0.131682	-0.299845	0.412221	0.962793	turquoise	FOXN3
ENSG00000054793	-0.56627	0.24159	0.350951	0.767035	0.0826413	-0.938911	-0.462468	0.0702764	0.311717	-0.225802	0.699172	0.875741	turquoise	ATP9A
ENSG00000054965	-0.143523	0.654571	0.214059	0.175724	-0.470382	-0.858478	-0.878317	-0.401273	-0.210476	-0.329439	0.386519	0.955174	turquoise	FAM168A
ENSG00000054983	-0.109115	0.676312	0.572243	0.533714	-0.0933723	-0.816321	-0.631057	-0.374477	0.145944	-0.512544	0.302668	0.863628	turquoise	GALC
ENSG00000055163	-0.43488	0.135287	-0.139898	0.212614	-0.288031	-0.723391	-0.756173	-0.264849	-0.149099	0.396991	0.517609	0.706409	turquoise	CYFIP2
ENSG00000058404	-0.45689	0.386953	0.369232	0.653772	-0.0412794	-0.949928	-0.556056	-0.016903	0.197488	-0.355721	0.63768	0.932884	turquoise	CAMK2B
ENSG00000060656	-0.321617	0.536569	0.289339	0.436327	-0.269031	-0.9371	-0.706963	-0.170221	0.0875185	-0.385546	0.546342	0.975163	turquoise	PTPRU
ENSG00000061337	-0.0735444	0.713	0.335769	0.240976	-0.328339	-0.82912	-0.863007	-0.448337	-0.246157	-0.399144	0.322689	0.933749	turquoise	LZTS1
ENSG00000061455	-0.168156	0.451914	0.286401	0.376734	-0.207943	-0.624965	-0.332225	-0.0823919	0.565856	-0.435048	0.319181	0.637707	turquoise	PRDM6
ENSG00000064300	-0.663807	-0.0261671	0.27964	0.839413	0.222629	-0.757164	-0.0588433	0.405333	0.696295	-0.225076	0.72328	0.62784	turquoise	NGFR
ENSG00000064309	-0.0931787	0.710573	0.372066	0.285133	-0.345664	-0.847697	-0.823827	-0.42902	-0.155475	-0.439091	0.332548	0.941337	turquoise	CDON
ENSG00000064393	0.0586864	0.799803	0.372587	0.141855	-0.403763	-0.74311	-0.807705	-0.473434	-0.22829	-0.553817	0.206609	0.877225	turquoise	HIPK2
ENSG00000066468	-0.181825	0.633284	0.249068	0.254632	-0.422452	-0.885569	-0.867563	-0.408586	-0.13618	-0.291935	0.406998	0.963597	turquoise	FGFR2
ENSG00000066735	0.120698	0.795795	0.276174	-0.00367956	-0.49089	-0.685654	-0.926117	-0.63029	-0.427741	-0.369969	0.12728	0.837217	turquoise	KIF26A
ENSG00000066926	0.140651	0.773181	0.564808	0.311925	-0.0848644	-0.634494	-0.770668	-0.668324	-0.252535	-0.385291	0.0480478	0.7384	turquoise	FECH
ENSG00000067141	-0.419273	0.412577	0.247745	0.48644	-0.271071	-0.951559	-0.708411	-0.189975	0.0844815	-0.191249	0.586666	0.951945	turquoise	NEO1
ENSG00000068615	-0.106606	0.692618	0.277296	0.24059	-0.356382	-0.847784	-0.887909	-0.467565	-0.139472	-0.302845	0.345328	0.941264	turquoise	REEP1
ENSG00000069535	-0.37871	0.331501	-0.268082	-0.0393881	-0.671533	-0.828764	-0.874426	-0.179014	-0.208777	0.0794891	0.585887	0.888732	turquoise	MAOB
ENSG00000069702	-0.0662923	0.711777	0.325745	0.237601	-0.31144	-0.821378	-0.883653	-0.480945	-0.250643	-0.350442	0.310552	0.925336	turquoise	TGFBR3
ENSG00000070214	-0.0565216	0.73024	0.314213	0.200616	-0.391985	-0.824708	-0.872789	-0.466297	-0.225308	-0.404602	0.307657	0.935012	turquoise	SLC44A1
ENSG00000071537	-0.18586	0.584544	0.475692	0.4804	-0.242453	-0.828269	-0.615356	-0.330014	0.142134	-0.436677	0.351328	0.858925	turquoise	SEL1L
ENSG00000071967	-0.453586	0.407081	0.206824	0.513434	-0.225331	-0.97318	-0.695824	-0.127266	0.216761	-0.184246	0.637667	0.968413	turquoise	CYBRD1
ENSG00000072310	-0.394949	0.434825	-0.0101803	0.222599	-0.512564	-0.93276	-0.795153	-0.146846	0.0518021	-0.155793	0.615214	0.973602	turquoise	SREBF1
ENSG00000073067	-0.156235	0.622545	0.369551	0.337425	-0.221555	-0.822053	-0.688164	-0.214744	-0.163274	-0.540552	0.408467	0.904668	turquoise	CYP2W1
ENSG00000074370	-0.403582	0.457129	0.216759	0.443989	-0.276888	-0.972209	-0.761385	-0.177847	0.0215324	-0.228237	0.607557	0.993036	turquoise	ATP2A3
ENSG00000075213	-0.0558778	0.733529	0.479529	0.362947	-0.269168	-0.823149	-0.771064	-0.469972	-0.0748454	-0.478419	0.275338	0.907064	turquoise	SEMA3A
ENSG00000076258	-0.578782	0.219903	-0.135863	0.283504	-0.49218	-0.937179	-0.659067	0.0678362	0.205275	-0.0344753	0.756389	0.925279	turquoise	FMO4
ENSG00000076716	-0.407031	0.418183	0.374375	0.606335	-0.158776	-0.926933	-0.572856	-0.127753	0.260491	-0.31902	0.562001	0.910273	turquoise	GPC4
ENSG00000077942	-0.467473	0.386303	0.0827917	0.380107	-0.33256	-0.97888	-0.775135	-0.105069	0.00460856	-0.14341	0.675875	0.99606	turquoise	FBLN1
ENSG00000078018	-0.650124	-0.105528	-0.209034	0.291976	-0.213111	-0.672178	-0.2105	0.538766	0.173144	-0.133684	0.787087	0.621393	turquoise	MAP2
ENSG00000078081	-0.459486	0.405334	0.156883	0.444826	-0.311233	-0.98504	-0.735948	-0.122618	0.108763	-0.185129	0.654417	0.991866	turquoise	LAMP3
ENSG00000079101	-0.558577	0.236669	-0.128804	0.297521	-0.472528	-0.926152	-0.663475	0.02123	0.295312	0.00458397	0.727768	0.910334	turquoise	CLUL1
ENSG00000079215	-0.295906	0.54032	0.231965	0.340839	-0.359226	-0.929899	-0.814465	-0.282392	-0.0978092	-0.272851	0.512493	0.981405	turquoise	SLC1A3
ENSG00000079308	-0.133225	0.655026	0.165859	0.13795	-0.447014	-0.842157	-0.896431	-0.386025	-0.23805	-0.307105	0.391822	0.948015	turquoise	TNS1
ENSG00000079931	-0.539278	0.273522	0.0495245	0.469802	-0.214524	-0.956807	-0.735299	-0.110168	0.147412	0.0614466	0.695281	0.932489	turquoise	MOXD1
ENSG00000082438	-0.0868617	0.692667	0.372025	0.29975	-0.22426	-0.808291	-0.759087	-0.326157	-0.164163	-0.501792	0.347615	0.906743	turquoise	COBLL1
ENSG00000083750	-0.229814	0.314935	0.390767	0.526313	0.336413	-0.59171	-0.364265	0.0490249	-0.158741	-0.384682	0.408783	0.610493	turquoise	RRAGB
ENSG00000084112	0.0867415	0.78986	0.471898	0.208002	-0.421222	-0.694663	-0.680464	-0.495217	-0.0188941	-0.605034	0.130048	0.804488	turquoise	SSH1
ENSG00000084710	-0.448823	0.383075	-0.021944	0.25688	-0.476035	-0.956248	-0.814388	-0.136308	-0.0166809	-0.0853733	0.657074	0.984942	turquoise	EFR3B
ENSG00000084731	-0.536371	0.11963	0.2328	0.638467	0.222956	-0.761888	-0.292147	0.32779	0.112417	-0.309952	0.698675	0.718594	turquoise	KIF3C
ENSG00000085741	-0.638405	0.121356	0.121517	0.623369	-0.0659412	-0.930977	-0.579879	0.0051617	0.18838	0.0920183	0.736822	0.857908	turquoise	WNT11
ENSG00000087301	-0.366731	0.498546	0.265259	0.456138	-0.260401	-0.961943	-0.736386	-0.177908	0.0577317	-0.306643	0.580076	0.989497	turquoise	TXNDC16
ENSG00000088002	-0.480217	0.350707	0.00569228	0.35757	-0.388118	-0.951118	-0.744396	-0.120067	0.223434	-0.0374559	0.661933	0.951065	turquoise	SULT2B1
ENSG00000088386	-0.785332	-0.082767	0.165502	0.817722	0.150118	-0.869456	-0.206553	0.406674	0.51288	-0.0760258	0.854404	0.736161	turquoise	SLC15A1
ENSG00000088970	-0.158467	0.607226	0.0750507	0.0989731	-0.49625	-0.836199	-0.956458	-0.464884	-0.215588	-0.113504	0.387445	0.929704	turquoise	KIZ
ENSG00000090238	-0.719225	0.0333409	-0.177126	0.408307	-0.27131	-0.908616	-0.491764	0.315013	0.288459	0.010135	0.877208	0.853762	turquoise	YPEL3
ENSG00000090565	-0.193243	0.554108	0.224855	0.231787	-0.327298	-0.791634	-0.649709	-0.111763	-0.134492	-0.511408	0.449868	0.874998	turquoise	RAB11FIP3
ENSG00000091129	-0.334975	0.493411	0.092551	0.2555	-0.402167	-0.929105	-0.852057	-0.226686	-0.148792	-0.191596	0.567886	0.986928	turquoise	NRCAM
ENSG00000091536	-0.583153	0.198007	-0.189304	0.25756	-0.50032	-0.936129	-0.749837	-0.0450383	0.14806	0.148622	0.737964	0.919054	turquoise	MYO15A
ENSG00000091592	-0.652645	0.0999946	0.212935	0.72034	0.0532326	-0.879401	-0.279446	0.336306	0.461836	-0.273166	0.784532	0.797876	turquoise	NLRP1
ENSG00000092096	-0.401809	0.451804	0.124235	0.354317	-0.344695	-0.964734	-0.801727	-0.167489	-0.0347382	-0.192474	0.621227	0.9986	turquoise	SLC22A17
ENSG00000092621	-0.461336	0.0354688	-0.122014	0.306032	-0.336812	-0.609364	-0.382265	-0.0751652	0.590864	0.28757	0.47227	0.530825	turquoise	PHGDH
ENSG00000095015	-0.116636	0.658617	0.182685	0.117757	-0.53461	-0.83342	-0.893177	-0.441543	-0.226921	-0.298995	0.352527	0.935623	turquoise	MAP3K1
ENSG00000095303	-0.421004	0.399987	-0.00785644	0.250646	-0.451548	-0.946733	-0.858546	-0.205583	-0.084759	-0.038845	0.624976	0.980282	turquoise	PTGS1
ENSG00000095739	0.0251088	0.689349	0.407611	0.223336	-0.296488	-0.705179	-0.830626	-0.612308	-0.323856	-0.290291	0.158209	0.801215	turquoise	BAMBI
ENSG00000097096	-0.0740675	0.725235	0.374301	0.265536	-0.376881	-0.834719	-0.80217	-0.42015	-0.122417	-0.480275	0.316592	0.932464	turquoise	SYDE2
ENSG00000099194	-0.255952	0.545718	0.0233664	0.117831	-0.535958	-0.877647	-0.862929	-0.260208	-0.119553	-0.222364	0.504256	0.96006	turquoise	SCD
ENSG00000099954	-0.515586	0.317734	0.019477	0.36064	-0.328679	-0.965864	-0.731218	-0.00411706	-0.0170901	-0.134214	0.725351	0.976977	turquoise	CECR2
ENSG00000100031	-0.751379	0.00894516	-0.130795	0.491132	-0.241378	-0.922385	-0.446604	0.313659	0.420919	0.0287497	0.882754	0.844457	turquoise	GGT1
ENSG00000100033	-0.557383	0.295564	0.0850622	0.477485	-0.245732	-0.985336	-0.654103	0.0480819	0.151952	-0.167167	0.752378	0.972387	turquoise	PRODH
ENSG00000100167	0.161793	0.867365	0.416183	0.109641	-0.394502	-0.690783	-0.854334	-0.629912	-0.241645	-0.506361	0.0909714	0.837329	turquoise	2017-09-03
ENSG00000100271	-0.176539	0.633241	0.214744	0.2608	-0.390179	-0.85558	-0.79071	-0.334683	0.0890067	-0.32407	0.411017	0.928688	turquoise	TTLL1
ENSG00000100299	-0.529605	0.30973	-0.0145485	0.368016	-0.339171	-0.966737	-0.715688	0.00206127	0.130616	-0.0952865	0.733363	0.968639	turquoise	ARSA
ENSG00000100302	-0.537249	0.289629	-0.0222056	0.366559	-0.294397	-0.961043	-0.731919	0.00942265	0.0314854	-0.06917	0.743586	0.96504	turquoise	RASD2
ENSG00000101004	-0.629708	0.156667	-0.138369	0.32649	-0.394813	-0.956398	-0.722965	0.0351814	0.0101441	0.0989904	0.790701	0.933837	turquoise	NINL
ENSG00000101096	-0.445854	0.391819	0.0684234	0.33455	-0.35582	-0.960299	-0.783132	-0.104135	-0.075949	-0.161551	0.661737	0.988218	turquoise	NFATC2
ENSG00000101144	-0.30663	0.459156	0.061592	0.213475	-0.358267	-0.875153	-0.896716	-0.30591	-0.295994	-0.057707	0.519173	0.934932	turquoise	BMP7
ENSG00000101265	-0.19715	0.605978	0.19451	0.25222	-0.386109	-0.878519	-0.901976	-0.441777	-0.102834	-0.167116	0.412343	0.949056	turquoise	RASSF2
ENSG00000101307	-0.19029	0.458154	0.553009	0.651764	0.206073	-0.658684	-0.266965	-0.00516914	0.396577	-0.588005	0.356405	0.658968	turquoise	SIRPB1
ENSG00000101347	-0.181485	0.517775	-0.0542796	-0.00912651	-0.531096	-0.784745	-0.969769	-0.424008	-0.388502	-0.00395282	0.404187	0.882387	turquoise	SAMHD1
ENSG00000101384	0.0781578	0.703833	0.42265	0.155051	-0.439568	-0.606288	-0.520808	-0.328474	0.0126841	-0.69188	0.131621	0.711035	turquoise	JAG1
ENSG00000101474	-0.783608	-0.151016	0.144942	0.817319	0.184754	-0.8177	-0.228344	0.301312	0.462197	0.121032	0.80055	0.665909	turquoise	APMAP
ENSG00000101670	-0.00592543	0.684448	0.640989	0.518141	0.129108	-0.699862	-0.5977	-0.367539	-0.122507	-0.565795	0.217136	0.771957	turquoise	LIPG
ENSG00000101751	-0.310456	0.428323	-0.0984899	0.034302	-0.57832	-0.829212	-0.805522	-0.132988	-0.22635	-0.179729	0.551715	0.907116	turquoise	POLI
ENSG00000102409	-0.497321	0.319672	-0.0993412	0.251515	-0.491239	-0.938687	-0.740459	-0.0401074	0.150403	-0.0572346	0.697356	0.951281	turquoise	BEX4
ENSG00000102924	0.218384	0.655687	0.0327819	-0.277938	-0.799558	-0.405873	-0.6732	-0.609952	0.0114305	-0.222832	-0.0646156	0.53529	turquoise	CBLN1
ENSG00000103316	-0.446904	0.410787	0.0900667	0.365224	-0.396284	-0.971421	-0.743441	-0.106154	0.110963	-0.192249	0.653287	0.989192	turquoise	CRYM
ENSG00000103485	-0.477661	0.317153	-0.0747612	0.278322	-0.404938	-0.93293	-0.839609	-0.19096	0.0182514	0.111175	0.652746	0.9415	turquoise	QPRT
ENSG00000103710	-0.254361	0.492302	-0.125239	-0.0214408	-0.661975	-0.822796	-0.862223	-0.241575	-0.128741	-0.133214	0.495175	0.910502	turquoise	RASL12
ENSG00000104081	-0.547336	0.265993	-0.0404805	0.35146	-0.295566	-0.957067	-0.75077	0.00108249	-0.048169	-0.0284683	0.74817	0.960765	turquoise	BMF
ENSG00000104332	-0.168087	0.606322	0.100236	0.0950542	-0.498111	-0.840026	-0.896132	-0.346389	-0.287816	-0.269491	0.422891	0.943493	turquoise	SFRP1
ENSG00000104635	-0.0460411	0.631065	0.525292	0.409193	-0.151457	-0.726044	-0.701961	-0.522464	-0.15083	-0.343266	0.199449	0.783281	turquoise	SLC39A14
ENSG00000104814	-0.561251	0.218232	-0.0438884	0.420716	-0.210249	-0.925715	-0.726542	-0.0646897	0.142025	0.136934	0.716368	0.899268	turquoise	MAP4K1
ENSG00000104870	-0.658657	0.157133	0.00283526	0.534775	-0.159985	-0.977846	-0.638392	0.0715737	0.217505	0.0597316	0.807965	0.926199	turquoise	FCGRT
ENSG00000104888	-0.399955	0.448646	0.0907594	0.314557	-0.3995	-0.960006	-0.80828	-0.167864	-0.0390283	-0.184511	0.619716	0.997168	turquoise	SLC17A7
ENSG00000104967	-0.438186	0.409697	0.0573752	0.323264	-0.388723	-0.966617	-0.795638	-0.126021	-0.0218402	-0.153308	0.654742	0.995604	turquoise	NOVA2
ENSG00000105048	-0.57308	-0.15439	-0.418954	0.125236	-0.183834	-0.594667	-0.60988	0.00691521	-0.183579	0.627983	0.626683	0.545138	turquoise	TNNT1
ENSG00000105204	-0.607402	0.170865	-0.130252	0.318482	-0.389618	-0.913296	-0.575822	0.196859	0.188305	-0.0991662	0.79571	0.896806	turquoise	DYRK1B
ENSG00000105223	-0.594198	0.259	0.124041	0.556115	-0.178571	-0.996821	-0.628514	0.0520293	0.192803	-0.13	0.76782	0.964433	turquoise	PLD3
ENSG00000105289	-0.698683	-0.169972	-0.348398	0.322598	-0.30413	-0.678211	-0.313447	0.256764	0.647778	0.370224	0.730671	0.568237	turquoise	TJP3
ENSG00000105426	-0.235311	0.582504	0.452489	0.520234	-0.0996798	-0.89216	-0.724368	-0.311283	-0.0466021	-0.375515	0.437738	0.932073	turquoise	PTPRS
ENSG00000105429	-0.450508	0.411908	0.209864	0.479886	-0.254906	-0.98113	-0.716585	-0.110927	0.0654344	-0.23189	0.647879	0.988756	turquoise	MEGF8
ENSG00000105549	-0.261564	0.566823	0.27808	0.384534	-0.244536	-0.886476	-0.695841	-0.167874	0.0641186	-0.422867	0.503585	0.941602	turquoise	THEG
ENSG00000105612	-0.764377	-0.0870813	-0.0253831	0.648091	-0.0590593	-0.858416	-0.377574	0.199645	0.523309	0.228989	0.804054	0.729909	turquoise	DNASE2
ENSG00000105642	-0.409392	0.325295	-0.125991	0.124405	-0.466975	-0.86777	-0.87084	-0.182602	-0.295058	0.0595042	0.609951	0.912924	turquoise	KCNN1
ENSG00000105707	-0.48401	0.355239	-0.0169491	0.303615	-0.408361	-0.965343	-0.779154	-0.0697507	0.015931	-0.100627	0.696476	0.985661	turquoise	HPN
ENSG00000105738	0.0680529	0.771303	0.414768	0.151051	-0.382445	-0.709959	-0.763329	-0.461219	-0.313696	-0.582011	0.18161	0.84076	turquoise	SIPA1L3
ENSG00000105928	-0.505763	0.332081	0.171415	0.545103	-0.211437	-0.953719	-0.608769	-0.0470093	0.365841	-0.151147	0.667219	0.925307	turquoise	DFNA5
ENSG00000106003	-0.313838	0.507663	0.24766	0.378891	-0.321855	-0.92461	-0.804552	-0.300946	-0.0889385	-0.216498	0.508778	0.962656	turquoise	LFNG
ENSG00000106025	-0.200327	0.532734	-0.0878009	-0.0523112	-0.704151	-0.805797	-0.891525	-0.324025	-0.199635	-0.145027	0.435108	0.903961	turquoise	TSPAN12
ENSG00000106128	-0.499335	-0.102746	-0.220761	0.314709	0.101052	-0.527423	-0.445025	0.0340535	0.106772	0.491639	0.545046	0.461044	turquoise	GHRHR
ENSG00000106330	-0.36682	0.425751	-0.0180268	0.222008	-0.359387	-0.891324	-0.826851	-0.160359	-0.0846014	-0.0932826	0.598944	0.941674	turquoise	MOSPD3
ENSG00000106541	0.212197	0.475623	-0.0953455	-0.303384	-0.64787	-0.246655	-0.633404	-0.686085	0.035555	0.163106	-0.142838	0.338672	turquoise	AGR2
ENSG00000106686	-0.19186	0.102381	-0.347894	-0.174633	-0.562258	-0.300715	-0.187471	0.150236	0.462866	-0.0597087	0.295767	0.31967	turquoise	SPATA6L
ENSG00000107282	-0.125015	0.664984	0.188716	0.131132	-0.53309	-0.839712	-0.851489	-0.380674	-0.155855	-0.368792	0.372703	0.941849	turquoise	APBA1
ENSG00000107317	-0.369706	0.476903	0.315463	0.544704	-0.147203	-0.928723	-0.632473	-0.12873	0.255728	-0.329266	0.567212	0.936389	turquoise	PTGDS
ENSG00000107551	-0.615209	0.190356	-0.0357556	0.428696	-0.232336	-0.968784	-0.717134	0.0292908	-0.0010153	0.0512547	0.786569	0.945184	turquoise	RASSF4
ENSG00000107731	-0.430375	0.389561	0.00474517	0.261774	-0.429451	-0.946797	-0.837456	-0.16582	-0.119696	-0.0762817	0.639547	0.98081	turquoise	UNC5B
ENSG00000107789	-0.383105	0.30375	0.0370153	0.25717	-0.447788	-0.819481	-0.74127	-0.278431	-0.0540143	0.0678301	0.501034	0.823065	turquoise	MINPP1
ENSG00000108370	-0.494499	0.260843	-0.253015	0.106703	-0.53642	-0.890859	-0.824227	-0.0655697	-0.0768066	0.10456	0.696555	0.918718	turquoise	RGS9
ENSG00000108387	-0.434391	0.300919	-0.251548	0.0408352	-0.58285	-0.864327	-0.866302	-0.135699	-0.178163	0.100921	0.640966	0.909902	turquoise	2017-09-04
ENSG00000108551	-0.250303	0.299392	0.376218	0.426134	-0.187757	-0.593335	-0.168888	0.108211	0.249683	-0.584575	0.368377	0.586946	turquoise	RASD1
ENSG00000108602	-0.592652	0.0426813	-0.3443	0.128825	-0.617438	-0.768455	-0.491413	0.167437	0.385128	0.1242	0.709085	0.731288	turquoise	ALDH3A1
ENSG00000108679	-0.779837	-0.0110413	-0.0203539	0.602162	-0.117167	-0.957841	-0.484002	0.259067	0.243453	0.0655854	0.891358	0.867599	turquoise	LGALS3BP
ENSG00000108830	-0.637129	0.148457	-0.0585265	0.47633	-0.186302	-0.944569	-0.664463	0.0292204	0.220259	0.143822	0.779692	0.896359	turquoise	RND2
ENSG00000108947	-0.378896	0.46344	0.0528814	0.261447	-0.461959	-0.94857	-0.827598	-0.194981	-0.0228528	-0.166473	0.600431	0.992578	turquoise	EFNB3
ENSG00000108984	0.119265	0.426492	-0.415455	-0.622483	-0.866419	-0.321461	-0.812379	-0.43935	-0.608576	0.0898608	0.0735829	0.485071	turquoise	MAP2K6
ENSG00000109323	-0.61154	0.175956	0.159392	0.581817	-0.12652	-0.94727	-0.559429	0.0832249	0.0730462	-0.111646	0.751037	0.900001	turquoise	MANBA
ENSG00000109339	-0.538741	0.0296243	-0.224216	0.266804	-0.41907	-0.695967	-0.457285	-0.00541347	0.555408	0.296519	0.585454	0.625044	turquoise	MAPK10
ENSG00000109436	-0.321311	0.442756	0.303357	0.521789	0.0369082	-0.836695	-0.622016	-0.114688	0.072898	-0.2771	0.526359	0.856008	turquoise	TBC1D9
ENSG00000109472	-0.448589	0.401144	0.154349	0.413972	-0.333172	-0.972146	-0.737701	-0.118636	0.0209172	-0.203786	0.645478	0.985668	turquoise	CPE
ENSG00000109625	-0.79068	-0.0416485	-0.0918212	0.555755	-0.155034	-0.946993	-0.523307	0.222392	0.224519	0.177171	0.889994	0.854098	turquoise	CPZ
ENSG00000109654	-0.470813	0.35155	0.0274086	0.335435	-0.407279	-0.959948	-0.808315	-0.183104	0.0100215	-0.00954579	0.647155	0.968096	turquoise	TRIM2
ENSG00000110195	-0.617667	0.226912	0.0218129	0.488141	-0.246659	-0.993755	-0.65534	0.065137	0.196505	-0.0535245	0.792352	0.962436	turquoise	FOLR1
ENSG00000110324	-0.409959	0.382859	-0.0535716	0.175906	-0.491784	-0.903512	-0.779631	-0.0728827	-0.120644	-0.163827	0.639517	0.951802	turquoise	IL10RA
ENSG00000111199	-0.494573	0.343647	0.029403	0.38012	-0.288235	-0.967892	-0.777193	-0.0847914	0.0230096	-0.0615967	0.6983	0.977572	turquoise	TRPV4
ENSG00000111331	0.0885634	0.651343	0.67522	0.453725	0.150456	-0.575852	-0.595144	-0.507068	-0.335479	-0.459246	0.0727517	0.651218	turquoise	OAS3
ENSG00000111554	-0.346263	0.0546034	0.169555	0.472076	0.310254	-0.521128	-0.455694	-0.123159	-0.258068	0.222979	0.397939	0.48111	turquoise	MDM1
ENSG00000111653	-0.518225	0.317884	0.144149	0.515924	-0.121002	-0.965593	-0.686154	-0.0156242	0.0579809	-0.136859	0.713026	0.957392	turquoise	ING4
ENSG00000111801	-0.370297	0.4616	0.0517179	0.246844	-0.46849	-0.942253	-0.847846	-0.223087	-0.0818175	-0.142541	0.587504	0.988673	turquoise	BTN3A3
ENSG00000111816	-0.339406	0.464197	0.410953	0.634866	0.024368	-0.876422	-0.564391	-0.136554	0.281212	-0.335367	0.517928	0.872356	turquoise	FRK
ENSG00000111961	-0.270841	0.563955	0.169268	0.27879	-0.36048	-0.914879	-0.843768	-0.27024	-0.106283	-0.26774	0.513761	0.982768	turquoise	SASH1
ENSG00000112320	0.0566355	0.62987	0.472695	0.318332	0.0848981	-0.591881	-0.710405	-0.486779	-0.416003	-0.320526	0.139885	0.685986	turquoise	SOBP
ENSG00000112562	-0.403957	0.450275	0.115068	0.355633	-0.358055	-0.96793	-0.81709	-0.200107	-0.0016528	-0.148381	0.614184	0.997465	turquoise	SMOC2
ENSG00000112796	-0.439556	0.417714	0.271139	0.533127	-0.174446	-0.973667	-0.696545	-0.116998	0.0560494	-0.253979	0.632893	0.977654	turquoise	ENPP5
ENSG00000112964	-0.322403	0.491435	0.0979169	0.236909	-0.537385	-0.907229	-0.779512	-0.239476	0.042317	-0.222212	0.525217	0.952501	turquoise	GHR
ENSG00000112972	0.0781271	0.702644	0.491151	0.299735	-0.253975	-0.584598	-0.4349	-0.325447	0.332294	-0.657955	0.111373	0.660997	turquoise	HMGCS1
ENSG00000114115	-0.762658	-0.0684494	-0.330746	0.332432	-0.262802	-0.872672	-0.552077	0.295727	0.181323	0.247201	0.900238	0.810023	turquoise	RBP1
ENSG00000114127	-0.0531416	0.733377	0.316241	0.219652	-0.440006	-0.807891	-0.788844	-0.441034	0.0398868	-0.438328	0.288916	0.903936	turquoise	XRN1
ENSG00000114251	-0.339715	0.500821	0.147713	0.306214	-0.382961	-0.941843	-0.827249	-0.227203	-0.107497	-0.228182	0.565262	0.992423	turquoise	WNT5A
ENSG00000114315	-0.442811	0.321742	0.00371577	0.249017	-0.435439	-0.87006	-0.616018	0.0688311	-0.00828923	-0.280907	0.656674	0.89788	turquoise	HES1
ENSG00000114541	-0.553147	0.109399	0.0343487	0.494472	0.0533507	-0.819512	-0.634695	-0.0172034	-0.0986582	0.180084	0.676717	0.779472	turquoise	FRMD4B
ENSG00000114544	-0.549712	0.30627	0.0676012	0.468051	-0.274314	-0.991196	-0.697944	-0.0253354	0.190567	-0.0889574	0.732797	0.975306	turquoise	SLC41A3
ENSG00000114547	-0.336186	0.505154	0.125956	0.28484	-0.417879	-0.928209	-0.770418	-0.158698	-0.003641	-0.299863	0.573003	0.98107	turquoise	ROPN1B
ENSG00000114626	-0.75433	0.0221822	-0.167101	0.45009	-0.261946	-0.950597	-0.543061	0.265218	0.267918	0.0859943	0.899114	0.885345	turquoise	ABTB1
ENSG00000114698	-0.320018	0.512081	0.0549568	0.219069	-0.494962	-0.926226	-0.862563	-0.276465	-0.0142929	-0.150936	0.542216	0.981647	turquoise	PLSCR4
ENSG00000114739	-0.692043	0.0831764	-0.0956287	0.476291	-0.182686	-0.925193	-0.516669	0.256515	0.301771	-0.00445589	0.85362	0.87126	turquoise	ACVR2B
ENSG00000114796	-0.48598	0.288338	0.395148	0.748307	0.18644	-0.87509	-0.417822	0.106767	0.255351	-0.341094	0.648627	0.834195	turquoise	KLHL24
ENSG00000114854	-0.483425	0.315122	0.121825	0.501008	-0.172457	-0.926583	-0.708333	-0.163896	0.216863	0.0282943	0.630448	0.902518	turquoise	TNNC1
ENSG00000114861	-0.220797	0.549532	0.110763	0.182275	-0.385816	-0.819949	-0.732028	-0.153686	-0.0601053	-0.373147	0.481311	0.90258	turquoise	FOXP1
ENSG00000115020	-0.0936498	0.716589	0.329744	0.264205	-0.395684	-0.843136	-0.800298	-0.411543	-0.00155935	-0.437634	0.334136	0.933879	turquoise	PIKFYVE
ENSG00000115226	-0.469232	0.37283	-0.0131848	0.304126	-0.419617	-0.966129	-0.800375	-0.120355	0.0558638	-0.0673796	0.675059	0.98544	turquoise	FNDC4
ENSG00000115414	-0.787584	-0.0749605	-0.109575	0.551606	-0.0845499	-0.876134	-0.335999	0.451405	0.378335	-0.0100154	0.915193	0.785216	turquoise	FN1
ENSG00000115457	-0.389617	0.378248	0.149432	0.336763	-0.430309	-0.883922	-0.678287	-0.165067	0.0161825	-0.1931	0.55041	0.896742	turquoise	IGFBP2
ENSG00000115556	-0.153263	0.181674	-0.467912	-0.3401	-0.839961	-0.385066	-0.558682	-0.261724	0.209216	0.308037	0.2288	0.424657	turquoise	PLCD4
ENSG00000115596	-0.477002	0.348616	-0.036225	0.276811	-0.424047	-0.959414	-0.821293	-0.119785	-0.0585274	-0.0373513	0.681688	0.982019	turquoise	WNT6
ENSG00000115828	-0.760401	0.00762202	0.117581	0.735682	0.0591678	-0.93779	-0.374878	0.315308	0.361821	-0.0579456	0.871823	0.836366	turquoise	QPCT
ENSG00000116005	-0.387689	0.462094	0.273793	0.488916	-0.212707	-0.9609	-0.751727	-0.209888	0.0106907	-0.225049	0.580652	0.97705	turquoise	PCYOX1
ENSG00000116209	-0.763214	0.00683178	-0.0474173	0.595059	-0.113044	-0.955335	-0.530253	0.183104	0.317689	0.159254	0.867538	0.863264	turquoise	TMEM59
ENSG00000116574	-0.0249283	0.728423	0.188498	0.050133	-0.539583	-0.788045	-0.923513	-0.506832	-0.270545	-0.329602	0.278733	0.914738	turquoise	RHOU
ENSG00000116774	-0.523388	0.28617	0.168296	0.501461	-0.177913	-0.927614	-0.536143	0.137398	0.103621	-0.3223	0.720913	0.918019	turquoise	OLFML3
ENSG00000116833	-0.561432	0.108001	-0.320673	0.128864	-0.44197	-0.837696	-0.807653	-0.0715413	-0.159121	0.341455	0.707302	0.833514	turquoise	NR5A2
ENSG00000116852	-0.266854	0.576736	0.377159	0.464348	-0.215357	-0.90794	-0.670527	-0.187945	0.0730533	-0.472122	0.49322	0.952439	turquoise	KIF21B
ENSG00000117016	-0.228967	0.597617	0.15877	0.220805	-0.446731	-0.903165	-0.881731	-0.346126	-0.126911	-0.251025	0.467093	0.980696	turquoise	RIMS3
ENSG00000117984	-0.830452	-0.0989688	-0.0979781	0.605079	-0.0491849	-0.930508	-0.458568	0.316782	0.255924	0.177476	0.928706	0.825105	turquoise	CTSD
ENSG00000118194	-0.744399	-0.0925418	-0.151439	0.508537	-0.23293	-0.817829	-0.350983	0.239217	0.621568	0.221135	0.791337	0.700429	turquoise	TNNT2
ENSG00000118307	-0.309607	0.537464	0.290769	0.414101	-0.340365	-0.932228	-0.724541	-0.234189	0.0836182	-0.346428	0.514075	0.9673	turquoise	CASC1
ENSG00000118523	-0.387452	0.416319	0.108841	0.293316	-0.44748	-0.901272	-0.665163	-0.0556409	0.0300679	-0.321338	0.599212	0.934935	turquoise	CTGF
ENSG00000118971	-0.670034	0.149181	0.0120553	0.539288	-0.234324	-0.970399	-0.537397	0.155065	0.382005	-0.0476932	0.814998	0.910553	turquoise	CCND2
ENSG00000119227	-0.5419	0.294321	-0.0434556	0.338592	-0.422742	-0.968251	-0.706635	0.00370927	0.163144	-0.0854143	0.735173	0.966269	turquoise	PIGZ
ENSG00000119514	-0.576893	0.254844	0.0593178	0.449166	-0.286088	-0.978575	-0.659118	0.0513454	0.0586631	-0.13186	0.759256	0.962878	turquoise	GALNT12
ENSG00000119801	-0.718414	0.048323	-0.101552	0.493125	-0.199422	-0.918858	-0.462199	0.300586	0.382859	-0.0119184	0.866445	0.85243	turquoise	YPEL5
ENSG00000119943	-0.250321	0.5367	0.00995207	0.105516	-0.500893	-0.869272	-0.903767	-0.294079	-0.216342	-0.16257	0.497514	0.955222	turquoise	PYROXD2
ENSG00000120129	-0.167059	0.261522	0.317282	0.292938	-0.25359	-0.453815	-0.0902481	0.102266	0.211493	-0.568074	0.261797	0.456904	turquoise	DUSP1
ENSG00000120738	-0.335167	0.469077	0.0650416	0.20556	-0.489085	-0.896092	-0.763166	-0.13442	-0.0958459	-0.285119	0.56868	0.954983	turquoise	EGR1
ENSG00000120820	-0.459999	0.146361	0.00785243	0.416883	-0.228053	-0.730334	-0.533874	-0.178798	0.432212	0.247388	0.50679	0.666494	turquoise	GLT8D2
ENSG00000120915	-0.479333	0.0807942	-0.542502	-0.14818	-0.67702	-0.705448	-0.798888	-0.0848696	-0.153323	0.428532	0.621908	0.726664	turquoise	EPHX2
ENSG00000121064	-0.666236	0.152918	-0.0408951	0.471371	-0.239939	-0.987114	-0.661268	0.0964771	0.117146	0.0361515	0.828245	0.946708	turquoise	SCPEP1
ENSG00000121858	-0.596879	0.0803863	-0.224645	0.23631	-0.321765	-0.854144	-0.747749	-0.00198676	-0.208071	0.26429	0.739702	0.837755	turquoise	TNFSF10
ENSG00000122877	-0.352579	0.465244	0.0467841	0.220547	-0.441809	-0.915925	-0.808844	-0.150419	-0.126551	-0.226007	0.591749	0.974307	turquoise	EGR2
ENSG00000123358	-0.415551	0.375471	-0.0123002	0.211714	-0.470555	-0.899454	-0.727803	-0.0347259	-0.0880731	-0.221844	0.641054	0.941935	turquoise	NR4A1
ENSG00000123384	-0.698644	0.0764507	-0.178033	0.361816	-0.335782	-0.952236	-0.649678	0.162599	0.0598702	0.103068	0.857131	0.913228	turquoise	LRP1
ENSG00000123453	-0.190399	0.596569	0.055009	0.110594	-0.570049	-0.845342	-0.859821	-0.363197	0.0230663	-0.201541	0.420329	0.927085	turquoise	SARDH
ENSG00000123933	-0.456372	0.37894	0.0108634	0.302125	-0.389236	-0.962162	-0.816475	-0.127088	-0.059643	-0.0862001	0.668472	0.988922	turquoise	MXD4
ENSG00000124098	-0.561005	0.261725	-0.0886361	0.317	-0.384863	-0.963314	-0.733833	0.0258761	0.0544376	-0.0348606	0.76148	0.964746	turquoise	FAM210B
ENSG00000124374	-0.390434	0.429372	-0.0323144	0.210972	-0.464171	-0.931958	-0.866901	-0.206587	-0.0633036	-0.0580485	0.610224	0.977065	turquoise	PAIP2B
ENSG00000124406	-0.311419	0.47704	0.0127023	0.177866	-0.587799	-0.869782	-0.761054	-0.236197	0.179522	-0.161669	0.508734	0.913155	turquoise	ATP8A1
ENSG00000124507	-0.0688719	0.715108	0.203281	0.1131	-0.511559	-0.821479	-0.893711	-0.460208	-0.161208	-0.346071	0.321662	0.934679	turquoise	PACSIN1
ENSG00000124762	-0.68516	0.0781639	-0.02227	0.530586	-0.181294	-0.90135	-0.398596	0.311175	0.451829	-0.113545	0.830422	0.834086	turquoise	CDKN1A
ENSG00000124772	-0.561456	0.170907	0.228155	0.630693	-0.114445	-0.882722	-0.494339	-0.0287111	0.271345	-0.0394267	0.642609	0.811721	turquoise	CPNE5
ENSG00000124786	-0.218944	0.566953	0.0567003	0.126833	-0.488504	-0.868836	-0.939897	-0.390505	-0.221043	-0.122735	0.451701	0.953648	turquoise	SLC35B3
ENSG00000125246	-0.300087	0.550052	0.303886	0.414785	-0.304232	-0.928671	-0.712938	-0.196002	0.0433188	-0.403951	0.522091	0.971967	turquoise	CLYBL
ENSG00000125378	-0.0548741	0.676566	0.473232	0.357733	-0.265046	-0.777765	-0.757587	-0.521697	-0.113497	-0.372659	0.234304	0.847724	turquoise	BMP4
ENSG00000125510	-0.552458	0.302396	0.0643051	0.467567	-0.259551	-0.990043	-0.69653	-0.0107831	0.170493	-0.0947067	0.739914	0.975652	turquoise	OPRL1
ENSG00000125740	-0.327488	0.461913	0.0627571	0.192001	-0.497031	-0.877595	-0.736709	-0.113617	-0.0957026	-0.308157	0.560299	0.93761	turquoise	FOSB
ENSG00000125848	-0.325443	0.514996	0.0989151	0.255353	-0.443702	-0.936666	-0.852552	-0.252823	-0.0697577	-0.19743	0.554268	0.992943	turquoise	FLRT3
ENSG00000126583	-0.305236	0.44216	0.533997	0.686361	0.193405	-0.825429	-0.519463	-0.108156	-0.012372	-0.42258	0.482813	0.828738	turquoise	PRKCG
ENSG00000126709	-0.381379	0.434289	0.0499881	0.265238	-0.424613	-0.936299	-0.868386	-0.256958	-0.124468	-0.0633013	0.583429	0.975251	turquoise	IFI6
ENSG00000126878	-0.161261	0.608617	0.043132	0.0502528	-0.550773	-0.835687	-0.936604	-0.395917	-0.25058	-0.189377	0.410432	0.940197	turquoise	AIF1L
ENSG00000126882	-0.215014	0.546013	-0.0460994	0.0150752	-0.59247	-0.835005	-0.910751	-0.312206	-0.225669	-0.15541	0.46416	0.932537	turquoise	FAM78A
ENSG00000127084	-0.345246	0.494499	0.126604	0.320817	-0.360703	-0.943756	-0.857736	-0.280243	-0.0427696	-0.130703	0.557838	0.985955	turquoise	FGD3
ENSG00000128016	-0.450561	0.299229	0.0482891	0.301428	-0.38099	-0.849083	-0.529905	0.129949	0.0712679	-0.339765	0.655605	0.865614	turquoise	ZFP36
ENSG00000128268	-0.754349	-0.267515	0.048777	0.77367	0.445636	-0.654734	-0.137925	0.410144	0.353231	0.236404	0.771165	0.504031	turquoise	MGAT3
ENSG00000128567	-0.218902	0.614252	0.375363	0.40624	-0.265662	-0.901991	-0.759191	-0.304963	-0.0670387	-0.416077	0.44249	0.961375	turquoise	PODXL
ENSG00000128573	-0.30248	0.432388	0.547241	0.681408	-0.0261944	-0.79894	-0.370519	-0.0975953	0.383659	-0.492536	0.429319	0.774593	turquoise	FOXP2
ENSG00000129158	-0.198969	0.529211	0.0344777	0.113181	-0.51663	-0.814796	-0.930534	-0.490531	-0.127185	0.0247455	0.381929	0.881735	turquoise	SERGEF
ENSG00000129244	-0.343128	0.471859	0.0241159	0.190968	-0.477613	-0.912747	-0.829512	-0.175196	-0.130475	-0.202633	0.581616	0.974545	turquoise	ATP1B2
ENSG00000129295	-0.391264	-0.194961	-0.664694	-0.29742	-0.638992	-0.337778	-0.531427	-0.111061	-0.14164	0.738567	0.38518	0.315181	turquoise	LRRC6
ENSG00000129595	-0.136247	0.456175	0.663205	0.740806	0.301417	-0.608286	-0.276191	-0.206399	0.455283	-0.429679	0.234204	0.583763	turquoise	EPB41L4A
ENSG00000129675	-0.242528	0.594773	0.214535	0.276387	-0.427917	-0.905657	-0.791068	-0.264936	-0.0215506	-0.365295	0.481376	0.974596	turquoise	ARHGEF6
ENSG00000130203	-0.671169	0.148657	0.0326004	0.553445	-0.155957	-0.988731	-0.62757	0.0907649	0.159461	0.0239151	0.819488	0.935839	turquoise	APOE
ENSG00000130270	-0.732797	-0.0574744	0.0109928	0.587321	-0.0503545	-0.820448	-0.212355	0.498138	0.387982	-0.184544	0.853172	0.730858	turquoise	ATP8B3
ENSG00000130592	-0.472528	0.236451	0.109969	0.457343	-0.0352465	-0.853506	-0.716023	-0.124264	-0.186044	0.069674	0.621999	0.842652	turquoise	LSP1
ENSG00000130595	-0.76242	-0.138065	-0.0213545	0.646002	0.208936	-0.806615	-0.368743	0.348752	0.109544	0.163278	0.853181	0.703876	turquoise	TNNT3
ENSG00000130635	-0.148728	0.49968	0.62466	0.579118	0.0204412	-0.704423	-0.455787	-0.257989	-0.048258	-0.506147	0.28137	0.721996	turquoise	COL5A1
ENSG00000130701	-0.260834	0.405715	-0.0335258	0.11817	-0.293353	-0.766116	-0.886613	-0.306657	-0.393769	0.0549432	0.467769	0.83483	turquoise	RBBP8NL
ENSG00000130707	-0.490391	0.114221	-0.386965	0.0382988	-0.543765	-0.75325	-0.789289	-0.173325	0.0225153	0.447586	0.602797	0.746396	turquoise	ASS1
ENSG00000130751	-0.486925	0.288669	0.184922	0.573865	-0.0282896	-0.869737	-0.489081	0.0823517	0.375886	-0.217249	0.660363	0.841018	turquoise	NPAS1
ENSG00000130830	-0.516047	0.12366	-0.439687	-0.035785	-0.612164	-0.7925	-0.817172	-0.0625453	-0.163539	0.329307	0.67798	0.81099	turquoise	MPP1
ENSG00000131089	-0.236971	0.0616309	-0.48027	-0.242553	-0.638046	-0.327819	-0.299007	0.0851726	0.416012	0.14035	0.331164	0.343538	turquoise	ARHGEF9
ENSG00000131094	-0.338912	0.489233	0.161247	0.339045	-0.272683	-0.926512	-0.818562	-0.205884	-0.139048	-0.216336	0.570567	0.976526	turquoise	C1QL1
ENSG00000131409	0.0581757	0.766143	0.444626	0.212099	-0.320992	-0.7313	-0.835064	-0.583652	-0.322453	-0.435089	0.162909	0.847588	turquoise	LRRC4B
ENSG00000132122	0.0464185	0.666265	0.0430899	-0.0871285	-0.50589	-0.649711	-0.97613	-0.635428	-0.348761	-0.04637	0.172489	0.780423	turquoise	SPATA6
ENSG00000132386	-0.540972	0.279645	-0.0656191	0.309311	-0.382765	-0.959083	-0.740917	0.0150121	-0.00436296	-0.0669518	0.746984	0.96774	turquoise	SERPINF1
ENSG00000132517	-0.693392	0.109159	0.164485	0.707138	0.000212376	-0.954775	-0.420107	0.246512	0.364486	-0.146409	0.827513	0.874905	turquoise	SLC52A1
ENSG00000132563	-0.461872	0.384632	0.0322485	0.325746	-0.384476	-0.968335	-0.782102	-0.0929756	0.00018954	-0.137992	0.677334	0.99231	turquoise	REEP2
ENSG00000132854	-0.10328	0.507445	0.089214	0.0838272	-0.297709	-0.687463	-0.914404	-0.507372	-0.477085	0.0290128	0.290263	0.776244	turquoise	KANK4
ENSG00000132932	-0.559295	0.176618	-0.0956996	0.29987	-0.285464	-0.863111	-0.568194	0.216568	-0.0116957	-0.15135	0.76514	0.864532	turquoise	ATP8A2
ENSG00000133067	-0.355565	0.472658	0.0854131	0.272096	-0.370251	-0.926678	-0.813227	-0.161886	-0.117722	-0.220719	0.594456	0.98083	turquoise	LGR6
ENSG00000133135	-0.787461	-0.0706919	-0.279637	0.36096	-0.309718	-0.906856	-0.534415	0.318547	0.135503	0.173354	0.920686	0.840379	turquoise	RNF128
ENSG00000133256	-0.240506	0.487224	0.273718	0.364242	-0.330941	-0.820117	-0.747206	-0.422644	0.0300859	-0.111747	0.375624	0.842478	turquoise	PDE6B
ENSG00000134138	-0.195411	0.585014	0.0990975	0.119564	-0.501159	-0.85844	-0.913295	-0.371222	-0.280472	-0.211885	0.434964	0.951381	turquoise	MEIS2
ENSG00000134215	-0.362578	0.454833	-0.0127424	0.188868	-0.476288	-0.921432	-0.856688	-0.192567	-0.110976	-0.12971	0.59556	0.978052	turquoise	VAV3
ENSG00000134243	-0.359943	0.499045	0.306974	0.505304	-0.229783	-0.953637	-0.713136	-0.21643	0.155061	-0.28113	0.552243	0.968477	turquoise	SORT1
ENSG00000134253	-0.199724	0.498905	0.670148	0.73647	0.250693	-0.726344	-0.327335	-0.0659342	0.25361	-0.631406	0.367753	0.727522	turquoise	TRIM45
ENSG00000134258	-0.656706	0.165151	-0.00532041	0.493178	-0.224677	-0.989699	-0.661216	0.0753659	0.112103	0.0236407	0.814836	0.948319	turquoise	VTCN1
ENSG00000134709	0.146268	0.827229	0.321621	0.014058	-0.458244	-0.677122	-0.888123	-0.596937	-0.402196	-0.466093	0.116316	0.835281	turquoise	HOOK1
ENSG00000134874	-0.424611	0.338638	0.130369	0.477395	-0.157789	-0.850977	-0.574542	-0.0682817	0.408705	-0.114315	0.585945	0.833478	turquoise	DZIP1
ENSG00000134901	-0.3863	0.42677	0.192084	0.390745	-0.284012	-0.933313	-0.781689	-0.205921	-0.139811	-0.175436	0.580005	0.96005	turquoise	KDELC1
ENSG00000135447	-0.29694	0.465317	0.108734	0.283817	-0.400768	-0.864897	-0.844096	-0.402776	0.0342942	0.0137732	0.456129	0.893577	turquoise	PPP1R1A
ENSG00000135506	-0.775923	-0.0888602	-0.0673295	0.565383	-0.0935266	-0.89094	-0.489043	0.203191	0.142904	0.22572	0.847851	0.790046	turquoise	OS9
ENSG00000135549	-0.344905	0.320758	0.474626	0.615383	0.103767	-0.748879	-0.35207	0.0809783	-0.0564113	-0.517226	0.504567	0.743033	turquoise	PKIB
ENSG00000135625	-0.398413	0.399078	-0.0521071	0.172003	-0.506686	-0.900051	-0.765494	-0.0687297	-0.0588011	-0.188636	0.631331	0.949685	turquoise	EGR4
ENSG00000135677	-0.461122	0.394608	0.291874	0.582391	-0.145564	-0.975109	-0.661501	-0.107684	0.140343	-0.23693	0.637942	0.96417	turquoise	GNS
ENSG00000135828	-0.214316	0.594026	0.243091	0.272004	-0.346572	-0.884031	-0.839298	-0.315962	-0.230562	-0.326685	0.453831	0.962745	turquoise	RNASEL
ENSG00000135838	-0.14157	0.665208	0.220885	0.204107	-0.403605	-0.851877	-0.835838	-0.340636	-0.117559	-0.382048	0.401255	0.949042	turquoise	NPL
ENSG00000135916	-0.646483	0.166432	-0.0442145	0.465608	-0.224462	-0.978811	-0.691767	0.0442977	0.117482	0.0847065	0.80483	0.940158	turquoise	ITM2C
ENSG00000135925	-0.415043	0.356845	0.00938343	0.241535	-0.371868	-0.898852	-0.805273	-0.125986	-0.259068	-0.0962409	0.625347	0.938665	turquoise	WNT10A
ENSG00000136205	-0.138125	0.666979	0.278686	0.244078	-0.376023	-0.864936	-0.876905	-0.422986	-0.20881	-0.332825	0.377852	0.956543	turquoise	TNS3
ENSG00000136295	-0.340368	0.515229	0.249857	0.411493	-0.268914	-0.946362	-0.752061	-0.175593	-0.0185961	-0.330499	0.568541	0.987716	turquoise	TTYH3
ENSG00000136542	-0.32141	0.338973	0.47582	0.654769	0.244772	-0.758923	-0.518992	-0.130827	-0.160104	-0.255947	0.461627	0.749974	turquoise	GALNT5
ENSG00000136828	-0.698875	0.0774381	-0.00604992	0.58883	-0.136381	-0.933053	-0.49305	0.162742	0.467878	0.0679555	0.812608	0.84964	turquoise	RALGPS1
ENSG00000136883	-0.668137	0.133968	-0.123973	0.412192	-0.270958	-0.966138	-0.669274	0.112752	0.143937	0.0890853	0.834825	0.929149	turquoise	KIF12
ENSG00000136944	0.244908	0.795439	0.716153	0.32523	0.0354551	-0.521998	-0.615783	-0.586493	-0.392141	-0.629622	-0.0474627	0.643398	turquoise	LMX1B
ENSG00000137070	-0.567654	0.208228	-0.173651	0.225009	-0.451649	-0.923519	-0.726433	0.0632134	-0.0553528	0.00126956	0.764635	0.930607	turquoise	IL11RA
ENSG00000137103	-0.442033	0.395008	0.232207	0.531301	-0.0904069	-0.950523	-0.704386	-0.102959	0.0446878	-0.190532	0.64062	0.954493	turquoise	TMEM8B
ENSG00000137393	-0.108973	0.693381	0.264041	0.213202	-0.478316	-0.845381	-0.835315	-0.443224	-0.00781832	-0.355504	0.337523	0.933746	turquoise	RNF144B
ENSG00000137474	-0.492624	0.352934	0.0172673	0.358683	-0.339874	-0.973982	-0.779456	-0.0852207	0.0420421	-0.0771907	0.698374	0.986156	turquoise	MYO7A
ENSG00000137642	-0.14793	0.674453	0.305159	0.280761	-0.360627	-0.877066	-0.842424	-0.388985	-0.128594	-0.382523	0.390963	0.963896	turquoise	SORL1
ENSG00000137726	-0.417408	0.42443	0.103668	0.337808	-0.359157	-0.957994	-0.786455	-0.132655	-0.0751055	-0.196085	0.635755	0.991082	turquoise	FXYD6
ENSG00000137801	-0.00328394	0.676935	0.578183	0.383299	-0.21263	-0.704449	-0.604257	-0.427421	-0.110053	-0.568382	0.181071	0.777002	turquoise	THBS1
ENSG00000137802	-0.443635	0.281821	0.192835	0.428601	-0.27781	-0.819798	-0.404489	0.152441	0.179479	-0.424437	0.615329	0.812844	turquoise	MAPKBP1
ENSG00000137872	-0.402757	0.444585	0.0918394	0.318363	-0.414204	-0.947728	-0.74105	-0.101348	0.0629718	-0.25536	0.626459	0.982048	turquoise	SEMA6D
ENSG00000138131	-0.557299	0.250371	0.333525	0.738479	0.00403135	-0.927561	-0.416337	0.0995037	0.429951	-0.277055	0.689693	0.864064	turquoise	LOXL4
ENSG00000138316	-0.621791	0.219433	0.072507	0.523037	-0.232825	-0.986705	-0.585975	0.121779	0.223957	-0.143848	0.794099	0.950563	turquoise	ADAMTS14
ENSG00000138413	-0.381196	0.28809	-0.183283	0.139948	-0.505753	-0.770157	-0.728717	-0.22522	0.276154	0.19419	0.517326	0.775495	turquoise	IDH1
ENSG00000138449	-0.134502	0.667696	0.194835	0.158021	-0.48315	-0.849173	-0.847812	-0.357131	-0.133763	-0.378221	0.391147	0.950416	turquoise	SLC40A1
ENSG00000138613	-0.60834	-0.116353	0.0393182	0.60176	-0.0405507	-0.61994	-0.118303	0.190534	0.789126	0.162933	0.583054	0.478855	turquoise	APH1B
ENSG00000138622	-0.02548	0.721158	0.65704	0.522077	-0.00764362	-0.755644	-0.586349	-0.355281	0.0044955	-0.652952	0.239986	0.825316	turquoise	HCN4
ENSG00000138795	-0.489492	0.357412	0.0864088	0.405035	-0.311464	-0.981855	-0.773681	-0.11143	-0.004418	-0.0996333	0.683767	0.989338	turquoise	LEF1
ENSG00000138798	-0.516412	0.343916	0.173224	0.540064	-0.180434	-0.987489	-0.678501	-0.053213	0.18656	-0.15054	0.698835	0.971466	turquoise	EGF
ENSG00000139112	-0.57779	0.221408	0.268486	0.728131	0.0739864	-0.933147	-0.506151	0.0458316	0.33482	-0.113375	0.70886	0.868906	turquoise	GABARAPL1
ENSG00000139173	-0.0555418	0.745382	0.368795	0.268811	-0.355199	-0.830535	-0.828857	-0.469411	-0.0701795	-0.431887	0.296406	0.928473	turquoise	TMEM117
ENSG00000139182	-0.435892	0.349521	-0.0538604	0.195193	-0.477419	-0.900409	-0.741099	-0.0254423	-0.106494	-0.174139	0.65939	0.940571	turquoise	CLSTN3
ENSG00000139324	-0.123643	0.671657	0.448132	0.391935	-0.277267	-0.847655	-0.757714	-0.429471	-0.0493697	-0.42247	0.32706	0.913713	turquoise	TMTC3
ENSG00000139515	-0.431692	-0.241012	-0.627051	-0.274276	-0.743054	-0.317239	-0.301244	0.115944	0.0773892	0.479827	0.421559	0.278853	turquoise	PDX1
ENSG00000139880	-0.334165	0.492571	0.283201	0.452526	-0.139518	-0.919532	-0.743959	-0.174948	-0.103136	-0.301457	0.558261	0.958188	turquoise	CDH24
ENSG00000140022	-0.114707	0.680695	0.202605	0.150456	-0.498987	-0.848914	-0.902103	-0.45372	-0.170939	-0.301481	0.355709	0.949758	turquoise	STON2
ENSG00000140450	-0.484073	0.338122	0.0832521	0.376958	-0.3093	-0.942105	-0.669021	0.0304453	-0.0127981	-0.247006	0.698462	0.957623	turquoise	ARRDC4
ENSG00000140479	0.00787741	0.749336	0.290534	0.105914	-0.433613	-0.765475	-0.867413	-0.472001	-0.331708	-0.446614	0.254665	0.897009	turquoise	PCSK6
ENSG00000140511	-0.773484	-0.150547	0.0384963	0.65546	0.111937	-0.816168	-0.31765	0.364638	0.0754435	0.0741256	0.844474	0.706838	turquoise	HAPLN3
ENSG00000140600	-0.374951	0.433547	-0.0259667	0.222618	-0.425288	-0.916097	-0.868901	-0.235113	-0.0312648	-0.0242694	0.589048	0.958994	turquoise	SH3GL3
ENSG00000141639	-0.35128	0.494185	0.0892202	0.285571	-0.425706	-0.945837	-0.845118	-0.250479	0.00465458	-0.15275	0.569632	0.99043	turquoise	MAPK4
ENSG00000142173	-0.479144	0.29025	0.310308	0.585388	-0.0787414	-0.898132	-0.539731	0.0076714	-0.00784769	-0.28141	0.634092	0.877337	turquoise	COL6A2
ENSG00000142609	-0.496822	0.294349	0.0563837	0.357065	-0.304612	-0.914449	-0.633335	0.078586	-0.0533134	-0.242648	0.705974	0.927357	turquoise	CFAP74
ENSG00000142784	-0.484952	0.347544	-0.0104816	0.328481	-0.340126	-0.954374	-0.763006	-0.0499505	0.0343181	-0.0956359	0.70027	0.972282	turquoise	WDTC1
ENSG00000142871	-0.340456	0.149043	0.411698	0.559836	-0.032313	-0.565383	-0.0805776	0.143358	0.270168	-0.437839	0.392865	0.510561	turquoise	CYR61
ENSG00000143061	-0.400562	0.447132	0.369792	0.586259	-0.109957	-0.948339	-0.625048	-0.0973853	0.0950972	-0.368597	0.59416	0.952638	turquoise	IGSF3
ENSG00000143126	-0.57648	0.192277	0.110772	0.481023	-0.21897	-0.909115	-0.509536	0.167907	0.0572454	-0.233906	0.743039	0.882662	turquoise	CELSR2
ENSG00000143333	-0.31555	0.232681	-0.255185	-0.0440356	-0.717641	-0.609646	-0.467024	-0.00300416	0.373804	-0.06285	0.450776	0.628818	turquoise	RGS16
ENSG00000143341	-0.383094	0.379442	-0.0881026	0.138147	-0.519343	-0.890121	-0.897875	-0.262084	-0.201541	0.0541352	0.577128	0.935061	turquoise	HMCN1
ENSG00000143344	-0.282197	0.57273	0.23904	0.35771	-0.334072	-0.933195	-0.799225	-0.267844	0.0157409	-0.308912	0.512121	0.986818	turquoise	RGL1
ENSG00000143387	-0.72377	-0.0354593	-0.382632	0.205383	-0.432107	-0.872445	-0.633551	0.221461	0.0201993	0.25633	0.867825	0.832639	turquoise	CTSK
ENSG00000143412	-0.353992	0.407078	-0.168946	0.0633203	-0.602633	-0.866127	-0.885953	-0.253012	-0.030467	0.0544372	0.56037	0.919	turquoise	ANXA9
ENSG00000143416	-0.531272	0.213442	-0.28782	0.0997036	-0.596085	-0.878389	-0.734146	0.0315508	0.0500908	0.0610535	0.724151	0.893765	turquoise	SELENBP1
ENSG00000143434	-0.560416	0.256628	0.0267721	0.421269	-0.251169	-0.944688	-0.61015	0.131714	0.105759	-0.19082	0.76528	0.937767	turquoise	SEMA6C
ENSG00000143437	0.046188	0.786462	0.26499	0.0617448	-0.491208	-0.754648	-0.9024	-0.54276	-0.268863	-0.408417	0.214623	0.892605	turquoise	ARNT
ENSG00000143494	0.0330635	0.702589	0.250336	0.0768787	-0.49715	-0.707315	-0.90485	-0.662428	-0.246487	-0.190792	0.155734	0.815	turquoise	VASH2
ENSG00000143515	-0.426074	0.420285	0.250036	0.495563	-0.271163	-0.962789	-0.698124	-0.165086	0.119465	-0.221805	0.601186	0.963558	turquoise	ATP8B2
ENSG00000143603	-0.378533	0.478583	0.226494	0.434049	-0.257462	-0.963707	-0.780161	-0.201559	-0.0165727	-0.232295	0.589368	0.992142	turquoise	KCNN3
ENSG00000143847	-0.702966	0.000320359	-0.0251192	0.529299	-0.0675951	-0.845681	-0.321486	0.439052	0.270849	-0.160684	0.854517	0.779878	turquoise	PPFIA4
ENSG00000143891	-0.748795	-0.337704	-0.603044	0.12905	-0.423525	-0.583764	-0.310032	0.321605	0.500026	0.594327	0.75329	0.469674	turquoise	GALM
ENSG00000144115	-0.590694	0.199855	-0.0321567	0.423674	-0.170008	-0.934558	-0.663423	0.0999189	0.0248688	-0.0261827	0.782625	0.919373	turquoise	THNSL2
ENSG00000144152	-0.243425	0.540214	0.571762	0.675613	0.0925635	-0.845349	-0.566106	-0.240355	0.149767	-0.430605	0.416217	0.854515	turquoise	FBLN7
ENSG00000144218	0.0399078	0.335992	-0.113274	-0.219669	-0.519414	-0.357389	-0.757469	-0.625242	-0.455501	0.307388	0.0273968	0.434355	turquoise	AFF3
ENSG00000144455	-0.66014	0.0788828	0.0281216	0.571383	-0.0431493	-0.916851	-0.61572	0.0321351	0.102677	0.180052	0.768018	0.848401	turquoise	SUMF1
ENSG00000145020	-0.730739	-0.0560669	0.146807	0.745784	0.0665357	-0.814488	-0.130088	0.451427	0.618543	-0.181615	0.808799	0.692704	turquoise	AMT
ENSG00000145491	-0.646486	-0.09459	-0.444102	0.173206	-0.368153	-0.722075	-0.605002	0.0453239	0.22918	0.553477	0.713038	0.656695	turquoise	ROPN1L
ENSG00000145526	-0.515996	0.309832	0.128473	0.502297	-0.190093	-0.968688	-0.738821	-0.131702	0.0792671	-0.010666	0.677024	0.950291	turquoise	CDH18
ENSG00000145824	-0.360362	0.466399	0.0484184	0.234697	-0.436273	-0.92955	-0.831875	-0.178021	-0.119545	-0.19046	0.594753	0.984481	turquoise	CXCL14
ENSG00000145832	-0.37405	0.434407	0.0286701	0.256416	-0.356843	-0.921045	-0.868282	-0.219279	-0.155927	-0.0701584	0.595209	0.967858	turquoise	SLC25A48
ENSG00000145882	-0.54698	0.288903	0.122497	0.500667	-0.187707	-0.982083	-0.706046	-0.0329605	0.0140545	-0.0921422	0.726253	0.967586	turquoise	PCYOX1L
ENSG00000146122	-0.0836642	0.699815	0.203533	0.1228	-0.472835	-0.824507	-0.889001	-0.423278	-0.219433	-0.359736	0.344139	0.938892	turquoise	DAAM2
ENSG00000146197	-0.44621	0.406085	0.273417	0.530388	-0.20758	-0.968733	-0.663468	-0.0925719	0.0862662	-0.281908	0.633635	0.969003	turquoise	SCUBE3
ENSG00000146278	-0.817702	-0.0832717	-0.185392	0.500544	-0.169299	-0.918893	-0.445062	0.382284	0.292148	0.112177	0.942781	0.830606	turquoise	PNRC1
ENSG00000146555	-0.214674	0.619387	0.32196	0.350016	-0.347295	-0.903618	-0.79045	-0.330497	-0.0571498	-0.379877	0.438529	0.967735	turquoise	SDK1
ENSG00000147082	-0.0206581	0.697012	0.287001	0.106827	-0.527118	-0.738407	-0.732938	-0.373932	-0.164123	-0.525759	0.258901	0.851649	turquoise	CCNB3
ENSG00000147119	-0.0540393	0.463791	0.417166	0.398867	0.0515647	-0.577092	-0.654396	-0.546451	-0.180677	-0.0264754	0.145715	0.605059	turquoise	CHST7
ENSG00000147251	-0.729534	0.0325324	-0.166255	0.410281	-0.294475	-0.926506	-0.508997	0.305308	0.234964	0.00575994	0.885726	0.871912	turquoise	DOCK11
ENSG00000147257	-0.375722	0.463824	0.187348	0.369924	-0.325043	-0.936153	-0.713905	-0.0966073	-0.0258677	-0.336963	0.603156	0.974408	turquoise	GPC3
ENSG00000147475	-0.0089165	0.767368	0.424695	0.260634	-0.339163	-0.802269	-0.826275	-0.506416	-0.176643	-0.47381	0.247102	0.90929	turquoise	ERLIN2
ENSG00000147642	0.142693	0.809623	0.226273	-0.0618135	-0.577398	-0.670713	-0.941401	-0.671438	-0.352118	-0.330805	0.0997737	0.825339	turquoise	SYBU
ENSG00000147852	-0.126018	0.624907	0.582946	0.542243	-0.102014	-0.798759	-0.617589	-0.397161	0.0779921	-0.456087	0.288579	0.833701	turquoise	VLDLR
ENSG00000148057	-0.475617	0.239879	-0.158096	0.24641	-0.333005	-0.816823	-0.632163	0.0269584	0.261074	0.0292668	0.65817	0.817044	turquoise	IDNK
ENSG00000148218	-0.497718	0.347776	0.0798516	0.39744	-0.323924	-0.979691	-0.750397	-0.0716266	-0.00766573	-0.133618	0.696365	0.98794	turquoise	ALAD
ENSG00000148700	-0.0331017	0.729431	0.217906	0.0986368	-0.555986	-0.793866	-0.883074	-0.524086	-0.0927658	-0.323825	0.265527	0.903942	turquoise	ADD3
ENSG00000149043	-0.609797	0.0937427	-0.139678	0.308197	-0.23042	-0.857047	-0.597951	0.210846	-0.142657	-0.0122471	0.793769	0.845538	turquoise	SYT8
ENSG00000149050	-0.174594	0.38467	0.174385	0.144398	-0.506923	-0.629675	-0.529727	-0.235634	-0.0896586	-0.272979	0.296909	0.669089	turquoise	ZNF214
ENSG00000149131	-0.54225	0.319078	0.121591	0.498745	-0.235997	-0.994877	-0.679129	-0.00674009	0.1457	-0.155195	0.731498	0.981633	turquoise	SERPING1
ENSG00000149260	-0.296046	0.556165	0.230023	0.36191	-0.308816	-0.937161	-0.813683	-0.26327	-0.0377696	-0.282354	0.526274	0.989953	turquoise	CAPN5
ENSG00000149531	-0.556147	0.0305619	0.184061	0.639293	0.0936479	-0.666921	-0.0341398	0.453059	0.640366	-0.34868	0.659288	0.581189	turquoise	FRG1BP
ENSG00000149564	-0.728568	-0.122492	-0.283415	0.311117	-0.421721	-0.798611	-0.480664	0.163634	0.251905	0.332102	0.776004	0.708342	turquoise	ESAM
ENSG00000149639	-0.0281558	0.710377	0.458556	0.291911	-0.254013	-0.752389	-0.662001	-0.305407	-0.177728	-0.646856	0.278909	0.85583	turquoise	SOGA1
ENSG00000150347	-0.222771	0.57288	0.070855	0.121839	-0.519021	-0.874247	-0.900848	-0.33056	-0.219446	-0.216367	0.466945	0.963158	turquoise	ARID5B
ENSG00000150394	0.0280553	0.592325	0.338757	0.21179	-0.426935	-0.563014	-0.511797	-0.472945	0.355663	-0.323615	0.0856248	0.610777	turquoise	CDH8
ENSG00000150722	-0.290554	0.535391	0.181147	0.341787	-0.27269	-0.909234	-0.830143	-0.28562	-0.0227385	-0.190456	0.514783	0.960025	turquoise	PPP1R1C
ENSG00000150893	-0.247245	0.598639	0.260677	0.331149	-0.389167	-0.919067	-0.797254	-0.305826	0.00837729	-0.339464	0.472091	0.978418	turquoise	FREM2
ENSG00000150938	-0.0662726	0.639485	0.64272	0.537365	-0.0776438	-0.738848	-0.557724	-0.407607	0.0645508	-0.522389	0.219755	0.778321	turquoise	CRIM1
ENSG00000151117	-0.512824	0.298474	0.122087	0.514267	-0.114713	-0.947954	-0.721117	-0.102619	0.0833956	-0.00359039	0.680187	0.929729	turquoise	TMEM86A
ENSG00000151150	-0.632919	0.103692	-0.26757	0.234168	-0.505925	-0.907836	-0.72278	-0.00193614	0.1284	0.252778	0.763948	0.875451	turquoise	ANK3
ENSG00000151320	-0.0630878	0.700121	0.451393	0.399091	-0.173668	-0.772733	-0.655305	-0.364679	0.170556	-0.495432	0.283108	0.842787	turquoise	AKAP6
ENSG00000151348	-0.463542	0.284896	0.507794	0.828652	0.181828	-0.855735	-0.375378	-0.00525296	0.356225	-0.304835	0.568436	0.790067	turquoise	EXT2
ENSG00000151623	-0.342159	0.379023	-0.147537	0.0737783	-0.531053	-0.841475	-0.930135	-0.330428	-0.194912	0.156757	0.527074	0.891611	turquoise	NR3C2
ENSG00000152076	-0.466429	0.386495	0.316054	0.604785	-0.104537	-0.968621	-0.619219	-0.0510887	0.13258	-0.297561	0.650376	0.957478	turquoise	CCDC74B
ENSG00000152104	-0.128013	0.686707	0.366911	0.310862	-0.33219	-0.863275	-0.800108	-0.378607	-0.126336	-0.451273	0.368269	0.94966	turquoise	PTPN14
ENSG00000152223	-0.496195	0.152138	0.247338	0.566749	0.062223	-0.741775	-0.235402	0.353858	0.133498	-0.452581	0.661456	0.710497	turquoise	EPG5
ENSG00000152377	-0.0289055	0.694521	0.557493	0.407736	-0.221204	-0.723087	-0.511168	-0.285174	0.148193	-0.701226	0.236056	0.792945	turquoise	SPOCK1
ENSG00000152443	-0.397732	0.0348378	-0.362823	-0.143433	-0.638658	-0.550879	-0.493442	0.121843	-0.285798	0.0515665	0.526269	0.577584	turquoise	ZNF776
ENSG00000152518	-0.106829	0.674937	0.233184	0.162256	-0.437389	-0.835982	-0.891359	-0.428978	-0.277893	-0.338008	0.355178	0.942051	turquoise	ZFP36L2
ENSG00000152527	-0.688875	0.0469849	-0.25836	0.28095	-0.414689	-0.89294	-0.549673	0.271973	0.186461	0.0391868	0.853567	0.856886	turquoise	PLEKHH2
ENSG00000152642	-0.345346	0.431374	0.0627721	0.260069	-0.317928	-0.892638	-0.880277	-0.275311	-0.246139	-0.0361129	0.552172	0.94018	turquoise	GPD1L
ENSG00000153071	-0.0958768	0.484074	0.290673	0.316225	-0.182168	-0.562885	-0.310303	-0.071555	0.490687	-0.504665	0.266388	0.597059	turquoise	DAB2
ENSG00000153132	-0.509426	0.215717	0.204586	0.596609	-0.177509	-0.84157	-0.428808	-0.0263692	0.553309	-0.0853772	0.591834	0.771636	turquoise	CLGN
ENSG00000153162	-0.303192	0.529837	0.389461	0.508237	-0.14874	-0.921887	-0.713022	-0.229936	-0.0471315	-0.365066	0.508376	0.954253	turquoise	BMP6
ENSG00000153237	-0.138371	0.595204	0.381687	0.350314	-0.246829	-0.747537	-0.500425	-0.107658	0.143513	-0.648154	0.370647	0.813113	turquoise	CCDC148
ENSG00000153982	-0.758658	-0.0773953	-0.153089	0.479384	-0.143124	-0.885713	-0.569961	0.154292	0.0701702	0.309474	0.842589	0.799369	turquoise	GDPD1
ENSG00000154027	-0.343301	0.352821	-0.0955724	0.135339	-0.527117	-0.757701	-0.562406	-1.77353e-05	0.321004	-0.204421	0.539344	0.788315	turquoise	AK5
ENSG00000154175	-0.355918	0.444479	0.257882	0.423941	-0.168372	-0.901668	-0.708418	-0.116164	-0.180327	-0.317955	0.575039	0.938775	turquoise	ABI3BP
ENSG00000154553	-0.0297192	0.618485	0.550911	0.491239	-0.0959086	-0.657098	-0.506966	-0.447208	0.360982	-0.391546	0.154951	0.683114	turquoise	PDLIM3
ENSG00000154856	-0.0778074	0.720046	0.261821	0.17721	-0.448561	-0.832256	-0.854308	-0.425254	-0.122142	-0.406044	0.332877	0.939561	turquoise	APCDD1
ENSG00000154864	0.00987357	0.762548	0.569361	0.377869	-0.219917	-0.767145	-0.696394	-0.462675	-0.0870782	-0.593331	0.208068	0.85784	turquoise	PIEZO2
ENSG00000154930	-0.182106	0.615092	0.329346	0.361909	-0.37679	-0.845445	-0.692133	-0.346312	0.228702	-0.37057	0.373347	0.891983	turquoise	ACSS1
ENSG00000155629	-0.149492	0.624837	0.10111	0.080739	-0.610015	-0.821167	-0.811879	-0.327037	-0.0388705	-0.339035	0.391143	0.91668	turquoise	PIK3AP1
ENSG00000155760	-0.334127	0.48	0.478428	0.631523	-0.014038	-0.887732	-0.518872	-0.0611138	0.144357	-0.513274	0.530475	0.895984	turquoise	FZD7
ENSG00000156218	-0.0392239	0.682449	0.548736	0.482759	0.00263535	-0.746972	-0.698662	-0.480688	-0.00628459	-0.384867	0.228567	0.807963	turquoise	ADAMTSL3
ENSG00000156427	0.204928	0.64323	0.0607278	-0.170996	-0.509796	-0.434284	-0.85537	-0.782421	-0.21395	0.0592453	-0.0609844	0.556859	turquoise	FGF18
ENSG00000156509	-0.375414	0.29489	0.162078	0.385702	-0.126453	-0.804774	-0.734413	-0.238067	-0.288457	0.0280213	0.513237	0.812034	turquoise	FBXO43
ENSG00000156587	-0.650614	-0.151858	-0.4008	0.219159	-0.338511	-0.676657	-0.53472	0.0240601	0.276583	0.603129	0.670562	0.588272	turquoise	UBE2L6
ENSG00000157227	-0.582308	0.260824	0.216644	0.650987	-0.0710342	-0.981229	-0.575107	0.036118	0.276702	-0.146596	0.737079	0.934292	turquoise	MMP14
ENSG00000157303	-0.516845	0.00112884	-0.566386	-0.118673	-0.516645	-0.65539	-0.682381	0.107553	-0.178931	0.362885	0.677962	0.672147	turquoise	SUSD3
ENSG00000157353	-0.735181	-0.0998069	0.113442	0.733163	0.285942	-0.805132	-0.294549	0.378715	0.140168	0.0109784	0.82932	0.700978	turquoise	FUK
ENSG00000157514	-0.399418	0.170589	-0.18095	0.185356	-0.388664	-0.636658	-0.408084	0.0645356	0.557964	0.0216281	0.521567	0.616058	turquoise	TSC22D3
ENSG00000157637	-0.735586	-0.0205614	0.206336	0.79471	0.116655	-0.889975	-0.323197	0.251185	0.359296	-0.0240956	0.801636	0.771029	turquoise	SLC38A10
ENSG00000158008	-0.343082	0.484209	0.262562	0.47698	-0.122105	-0.908359	-0.697235	-0.149453	0.0948253	-0.283533	0.56077	0.935123	turquoise	EXTL1
ENSG00000158050	-0.403927	0.377569	0.0712903	0.272591	-0.45458	-0.878958	-0.624191	0.00264015	0.0406805	-0.32298	0.613615	0.909299	turquoise	DUSP2
ENSG00000158164	-0.367431	0.464246	0.154785	0.347449	-0.286882	-0.935839	-0.79382	-0.16136	-0.13499	-0.234807	0.597121	0.98049	turquoise	TMSB15A
ENSG00000158220	-0.677908	0.000811937	-0.0655697	0.433432	-0.19855	-0.823469	-0.334578	0.418493	0.180968	-0.171777	0.826154	0.769549	turquoise	ESYT3
ENSG00000158373	-0.0133894	0.340997	-0.520668	-0.566847	-0.944854	-0.38375	-0.759124	-0.348947	-0.251148	0.192593	0.180516	0.50611	turquoise	HIST1H2BD
ENSG00000158445	-0.40152	0.463526	0.20891	0.441449	-0.273043	-0.96331	-0.713514	-0.112821	0.101997	-0.295164	0.61934	0.986453	turquoise	KCNB1
ENSG00000158813	-0.0306105	0.363644	-0.263051	-0.310789	-0.864761	-0.433341	-0.668454	-0.455823	0.0264505	0.150308	0.126902	0.506102	turquoise	EDA
ENSG00000159164	-0.315779	0.531037	0.277567	0.413664	-0.283985	-0.942611	-0.790098	-0.269181	-0.0467108	-0.27645	0.525609	0.982412	turquoise	SV2A
ENSG00000159307	0.0729727	0.763853	0.221347	0.0215174	-0.461317	-0.711485	-0.96046	-0.639698	-0.350667	-0.25296	0.167493	0.849605	turquoise	SCUBE1
ENSG00000159388	-0.357139	0.479541	0.0901828	0.263715	-0.444669	-0.935247	-0.797816	-0.167794	-0.0587039	-0.245608	0.58802	0.986225	turquoise	BTG2
ENSG00000159403	-0.348355	0.502419	0.192482	0.355816	-0.368739	-0.951516	-0.793743	-0.221358	-0.032697	-0.257079	0.56432	0.992412	turquoise	C1R
ENSG00000159618	-0.313353	0.499784	0.0591067	0.18921	-0.548022	-0.909557	-0.835877	-0.258988	-0.0673603	-0.19126	0.530015	0.967469	turquoise	ADGRG5
ENSG00000159842	-0.0656124	0.731747	0.30997	0.222232	-0.388754	-0.823138	-0.817718	-0.413641	-0.0667738	-0.446124	0.320249	0.926864	turquoise	ABR
ENSG00000160161	-0.388021	0.455208	0.251615	0.449063	-0.248473	-0.953596	-0.739106	-0.16498	-0.0498858	-0.270852	0.592277	0.977888	turquoise	CILP2
ENSG00000160179	-0.421015	0.417751	0.0485326	0.310859	-0.390488	-0.960683	-0.841954	-0.201046	-0.0423946	-0.0767231	0.627231	0.990044	turquoise	ABCG1
ENSG00000160183	-0.482953	0.33483	-0.015431	0.295562	-0.45273	-0.957014	-0.802041	-0.145178	-0.0123704	-0.0189333	0.665341	0.968692	turquoise	TMPRSS3
ENSG00000160221	-0.4682	0.0617243	-0.250196	0.185673	-0.353401	-0.673975	-0.660951	-0.211809	0.165278	0.492924	0.51833	0.630912	turquoise	C21orf33
ENSG00000160285	-0.199576	0.587368	0.106139	0.125717	-0.508145	-0.862768	-0.895557	-0.348481	-0.256809	-0.244247	0.442289	0.955276	turquoise	LSS
ENSG00000160888	-0.457206	0.325426	-0.0209812	0.24414	-0.445368	-0.894708	-0.663632	0.0433178	-0.023994	-0.233004	0.674371	0.923226	turquoise	IER2
ENSG00000160932	-0.340334	0.31705	-0.0198952	0.232293	-0.230837	-0.780707	-0.848235	-0.325086	-0.235948	0.203683	0.492164	0.805966	turquoise	LY6E
ENSG00000160963	0.128356	0.735631	0.452009	0.176282	-0.19585	-0.623675	-0.823292	-0.63238	-0.492005	-0.360368	0.0770938	0.747542	turquoise	COL26A1
ENSG00000160999	-0.254078	0.210486	-0.174026	0.00260446	-0.325931	-0.586191	-0.814047	-0.371674	-0.462785	0.368947	0.362814	0.624251	turquoise	SH2B2
ENSG00000161048	-0.0991833	0.620009	0.0850045	0.0467764	-0.434049	-0.776375	-0.944746	-0.441839	-0.389066	-0.174198	0.348933	0.891918	turquoise	NAPEPLD
ENSG00000161513	-0.373926	0.445434	-0.0192492	0.193092	-0.485828	-0.927937	-0.862253	-0.199767	-0.102535	-0.106826	0.601077	0.980585	turquoise	FDXR
ENSG00000162040	-0.370094	0.444232	-0.0409449	0.18206	-0.48602	-0.913411	-0.833767	-0.167456	-0.0309278	-0.122533	0.602451	0.966286	turquoise	HS3ST6
ENSG00000162415	0.0302861	0.781805	0.379496	0.197077	-0.327436	-0.771556	-0.877349	-0.549423	-0.266045	-0.419946	0.218631	0.893718	turquoise	ZSWIM5
ENSG00000162552	-0.483788	0.360837	0.117541	0.440295	-0.267053	-0.979737	-0.774379	-0.140721	0.015372	-0.0783069	0.669252	0.981857	turquoise	WNT4
ENSG00000162591	-0.460429	0.340404	0.236635	0.499478	-0.146297	-0.909229	-0.556722	0.0767488	0.0121528	-0.372363	0.664899	0.914058	turquoise	MEGF6
ENSG00000162620	-0.31862	-0.0816921	-0.436961	-0.0775813	-0.159538	-0.352613	-0.579432	-0.153866	-0.27306	0.654976	0.363834	0.34585	turquoise	LRRIQ3
ENSG00000162636	-0.125282	0.663185	0.165092	0.15216	-0.427385	-0.833807	-0.881209	-0.391117	-0.140017	-0.296505	0.381716	0.935759	turquoise	FAM102B
ENSG00000162755	-0.825812	-0.198199	-0.184787	0.483706	-0.134464	-0.836963	-0.398341	0.369068	0.0876992	0.216514	0.898926	0.733169	turquoise	KLHDC9
ENSG00000162814	-0.130825	0.464945	0.209582	0.257676	-0.38636	-0.604117	-0.396967	-0.194084	0.549162	-0.340792	0.263228	0.62513	turquoise	SPATA17
ENSG00000162817	-0.336863	0.499427	0.0939399	0.263095	-0.407773	-0.935571	-0.851687	-0.231323	-0.108516	-0.190351	0.569009	0.991453	turquoise	C1orf115
ENSG00000162976	-0.425635	0.441195	0.22796	0.484782	-0.232419	-0.970113	-0.69048	-0.0907063	0.125564	-0.290707	0.635807	0.983288	turquoise	PQLC3
ENSG00000162999	-0.322727	0.387606	-0.222234	-0.0285485	-0.58319	-0.800209	-0.835627	-0.138953	-0.176611	-0.0365139	0.560887	0.876067	turquoise	DUSP19
ENSG00000163082	-0.56756	0.132116	-0.128206	0.25923	-0.447683	-0.867247	-0.681896	-0.0218217	-0.074345	0.120381	0.69489	0.846706	turquoise	SGPP2
ENSG00000163286	-0.191138	0.0802826	-0.290516	-0.0877325	-0.365755	-0.371036	-0.641628	-0.423232	-0.135427	0.597856	0.203973	0.373118	turquoise	ALPPL2
ENSG00000163331	-0.304399	0.507347	0.0234238	0.16878	-0.476396	-0.89722	-0.844966	-0.2095	-0.107238	-0.205807	0.550536	0.967829	turquoise	DAPL1
ENSG00000163346	-0.654217	0.176946	-0.00619902	0.489487	-0.242836	-0.984679	-0.603647	0.147365	0.207435	-0.068173	0.826638	0.945845	turquoise	PBXIP1
ENSG00000163431	-0.430805	0.416988	0.11822	0.376552	-0.298945	-0.959569	-0.754105	-0.0872893	-0.0263217	-0.221964	0.654704	0.988001	turquoise	LMOD1
ENSG00000163520	-0.583199	0.247415	0.0130295	0.427641	-0.283247	-0.985025	-0.72142	0.00140386	0.0220922	-0.0309813	0.762963	0.970052	turquoise	FBLN2
ENSG00000163531	-0.454335	0.357961	0.401954	0.699044	0.00916886	-0.903183	-0.432041	0.0582577	0.362808	-0.416635	0.620637	0.871309	turquoise	NFASC
ENSG00000163590	-0.205559	0.613093	0.406558	0.413739	-0.25426	-0.879632	-0.702625	-0.262739	-0.0552491	-0.489392	0.430128	0.939663	turquoise	PPM1L
ENSG00000163704	-0.416361	0.432481	0.120622	0.359998	-0.340811	-0.965872	-0.797731	-0.158366	-0.0553632	-0.178581	0.63054	0.995902	turquoise	PRRT3
ENSG00000163864	-0.342117	0.469116	0.158585	0.315971	-0.323446	-0.919693	-0.821177	-0.222643	-0.207602	-0.201805	0.559978	0.968232	turquoise	NMNAT3
ENSG00000163995	-0.286783	0.138719	-0.235999	0.0617183	-0.31384	-0.530357	-0.679932	-0.351283	0.0469115	0.504447	0.340358	0.522444	turquoise	ABLIM2
ENSG00000164050	-0.682944	-0.0163888	-0.0305604	0.482454	-0.114226	-0.807242	-0.284794	0.459034	0.209773	-0.197331	0.828437	0.746195	turquoise	PLXNB1
ENSG00000164187	-0.289145	0.442037	0.512274	0.593373	-0.0635828	-0.809749	-0.467855	-0.117763	0.0584497	-0.491742	0.441723	0.812538	turquoise	LMBRD2
ENSG00000164211	0.0580952	0.791567	0.41741	0.18975	-0.446391	-0.730105	-0.728106	-0.486301	-0.0148485	-0.568989	0.173058	0.842897	turquoise	STARD4
ENSG00000164300	-0.531352	0.326002	0.0780481	0.443514	-0.29437	-0.994202	-0.727425	-0.0478019	0.0942461	-0.109205	0.721941	0.988639	turquoise	SERINC5
ENSG00000164398	-0.51635	0.292167	0.0387483	0.432132	-0.308669	-0.91742	-0.58098	0.0356355	0.395671	-0.139053	0.689748	0.89668	turquoise	ACSL6
ENSG00000164463	-0.520195	0.326279	0.109897	0.459242	-0.309178	-0.964102	-0.609492	0.041793	0.247169	-0.237127	0.711211	0.953736	turquoise	CREBRF
ENSG00000164509	-0.0730969	0.623263	0.671064	0.591383	0.109456	-0.697029	-0.397069	-0.159908	0.132104	-0.738781	0.276034	0.743306	turquoise	IL31RA
ENSG00000164627	-0.393078	0.129498	-0.185633	0.182525	-0.299426	-0.652686	-0.698217	-0.290851	0.0823907	0.459782	0.45467	0.626995	turquoise	KIF6
ENSG00000164674	-0.545998	0.170877	0.0162113	0.456417	-0.111729	-0.815343	-0.402755	0.265819	0.350743	-0.208839	0.725083	0.785384	turquoise	SYTL3
ENSG00000164746	-0.232231	0.506529	0.233264	0.296346	-0.446106	-0.781674	-0.524819	-0.126368	0.302214	-0.460536	0.421569	0.819174	turquoise	C7orf57
ENSG00000164930	-0.315057	0.490699	0.293029	0.419002	-0.354713	-0.898125	-0.683913	-0.25066	0.109086	-0.294854	0.486172	0.918562	turquoise	FZD6
ENSG00000164976	-0.578589	0.249692	0.219489	0.634094	-0.137763	-0.971596	-0.564504	0.00733704	0.284968	-0.133285	0.713866	0.919654	turquoise	KIAA1161
ENSG00000165029	-0.305498	0.476406	-0.0719527	0.0815899	-0.638399	-0.876976	-0.877205	-0.293583	-0.0354937	-0.064879	0.516572	0.939225	turquoise	ABCA1
ENSG00000165215	-0.326555	0.358524	0.152435	0.352831	-0.163332	-0.808353	-0.801433	-0.339192	-0.238563	0.070032	0.469754	0.826279	turquoise	CLDN3
ENSG00000165240	-0.32698	0.526648	0.166515	0.32045	-0.384473	-0.944226	-0.806595	-0.221092	-0.0182423	-0.269974	0.557563	0.995089	turquoise	ATP7A
ENSG00000165272	-0.785533	-0.126391	-0.437434	0.236983	-0.400208	-0.855708	-0.584657	0.263631	0.129217	0.368779	0.898535	0.788981	turquoise	AQP3
ENSG00000165406	0.15732	0.846652	0.316739	0.0364984	-0.434919	-0.673965	-0.884373	-0.624916	-0.246101	-0.430664	0.101526	0.826059	turquoise	2017-03-08
ENSG00000165474	-0.407166	0.416968	0.0763481	0.291363	-0.404298	-0.938616	-0.777736	-0.119341	-0.108815	-0.207773	0.62697	0.97734	turquoise	GJB2
ENSG00000165475	-0.351317	0.506683	0.29689	0.499886	-0.198744	-0.947172	-0.719285	-0.208619	0.150724	-0.280733	0.553541	0.966652	turquoise	CRYL1
ENSG00000165633	-0.392252	0.464571	0.104561	0.336522	-0.383934	-0.962464	-0.805334	-0.187309	0.0397885	-0.177672	0.609417	0.996163	turquoise	VSTM4
ENSG00000165655	-0.0913995	0.678337	0.289146	0.207609	-0.360391	-0.82458	-0.888334	-0.461535	-0.310409	-0.328752	0.330476	0.926998	turquoise	ZNF503
ENSG00000165731	-0.208572	0.628874	0.340474	0.364261	-0.334746	-0.901381	-0.769796	-0.317306	-0.0206925	-0.412514	0.435007	0.965167	turquoise	RET
ENSG00000165821	-0.306827	0.522617	0.15477	0.284907	-0.387379	-0.928199	-0.858347	-0.284663	-0.150371	-0.204581	0.530267	0.985449	turquoise	SALL2
ENSG00000165949	-0.455587	0.296036	-0.117176	0.175547	-0.468731	-0.854005	-0.642015	0.0894086	0.0317745	-0.192632	0.678629	0.885677	turquoise	IFI27
ENSG00000166033	-0.420927	0.432086	0.146536	0.406286	-0.328614	-0.971933	-0.794186	-0.208188	0.0525207	-0.127718	0.613238	0.987761	turquoise	HTRA1
ENSG00000166073	-0.304663	0.537597	0.17803	0.308728	-0.352351	-0.928258	-0.810028	-0.21837	-0.0887019	-0.293977	0.544867	0.987903	turquoise	GPR176
ENSG00000166257	-0.220923	0.611951	0.253042	0.300083	-0.345468	-0.895018	-0.790725	-0.262816	-0.0760055	-0.394709	0.470607	0.970126	turquoise	SCN3B
ENSG00000166432	-0.697729	0.0825565	0.110985	0.646997	-0.0709701	-0.927225	-0.369034	0.318602	0.38382	-0.189136	0.835871	0.85062	turquoise	ZMAT1
ENSG00000166448	-0.716555	0.0462141	-0.0601121	0.553681	-0.178265	-0.931615	-0.527257	0.134683	0.429121	0.156687	0.817934	0.844781	turquoise	TMEM130
ENSG00000166750	-0.157835	0.444444	0.674788	0.740699	0.217465	-0.612192	-0.180273	-0.103415	0.559241	-0.561395	0.257433	0.5826	turquoise	SLFN5
ENSG00000166821	-0.216266	0.289601	-0.370607	-0.240629	-0.560683	-0.598044	-0.877762	-0.263721	-0.514198	0.233366	0.413101	0.691377	turquoise	PEX11A
ENSG00000166833	-0.112701	0.695166	0.35484	0.280127	-0.385831	-0.851247	-0.788754	-0.38349	-0.0944779	-0.467274	0.351059	0.940367	turquoise	NAV2
ENSG00000166963	-0.181358	0.627995	0.21235	0.214905	-0.441766	-0.859285	-0.776372	-0.263092	-0.066291	-0.42765	0.435597	0.946647	turquoise	MAP1A
ENSG00000167074	-0.144572	0.623171	0.0554367	0.037749	-0.577126	-0.829234	-0.927405	-0.400387	-0.24894	-0.222471	0.394782	0.937508	turquoise	TEF
ENSG00000167103	-0.734735	-0.0275611	-0.0190102	0.581546	0.0241322	-0.862924	-0.353788	0.421951	0.225451	-0.0792773	0.87912	0.787568	turquoise	PIP5KL1
ENSG00000167202	-0.318594	0.523516	0.191838	0.333654	-0.324748	-0.934548	-0.81103	-0.219787	-0.109763	-0.277385	0.552781	0.989024	turquoise	TBC1D2B
ENSG00000167244	-0.468709	0.326633	-0.0768597	0.209707	-0.479415	-0.925195	-0.78282	-0.0590461	-0.1156	-0.0861729	0.680224	0.956411	turquoise	IGF2
ENSG00000167941	-0.384754	0.424444	-0.0160336	0.195938	-0.488539	-0.926396	-0.863335	-0.20513	-0.150271	-0.0865739	0.602162	0.975241	turquoise	SOST
ENSG00000168060	-0.251873	0.534177	0.146211	0.235464	-0.370348	-0.8818	-0.901975	-0.368883	-0.259209	-0.137191	0.468393	0.949764	turquoise	NAALADL1
ENSG00000168216	-0.726816	-0.018084	0.138366	0.734201	-0.016121	-0.873889	-0.302237	0.234984	0.545177	0.00624624	0.779918	0.750488	turquoise	LMBRD1
ENSG00000168280	-0.236919	0.587927	0.339284	0.425216	-0.271404	-0.901221	-0.784265	-0.38162	0.0638933	-0.264446	0.42843	0.941529	turquoise	KIF5C
ENSG00000168297	-0.56609	-0.0725857	-0.548624	0.00885646	-0.484438	-0.632347	-0.570362	0.0695879	0.266208	0.51403	0.650552	0.592205	turquoise	PXK
ENSG00000168298	-0.196977	0.380981	-0.240519	-0.158	-0.530808	-0.66496	-0.904166	-0.294703	-0.522603	0.0977222	0.4155	0.766672	turquoise	HIST1H1E
ENSG00000168300	-0.545889	0.279553	0.0625043	0.436495	-0.228718	-0.956003	-0.644665	0.0870972	0.0414449	-0.1885	0.75204	0.953197	turquoise	PCMTD1
ENSG00000168646	-0.387343	0.403302	-0.0363858	0.200685	-0.434953	-0.913479	-0.892952	-0.241358	-0.18282	0.00576401	0.595475	0.958337	turquoise	AXIN2
ENSG00000168671	-0.324422	0.500254	0.307762	0.48696	-0.121033	-0.921003	-0.771314	-0.263986	-0.0429434	-0.218487	0.525357	0.949251	turquoise	UGT3A2
ENSG00000168675	-0.291424	0.441062	0.621302	0.73626	0.184278	-0.796812	-0.386201	-0.0407266	0.119881	-0.568651	0.454591	0.789297	turquoise	LDLRAD4
ENSG00000168785	-0.562728	0.253875	-0.121131	0.306541	-0.428424	-0.959151	-0.749628	-0.0296628	0.152558	0.0519078	0.743107	0.951279	turquoise	TSPAN5
ENSG00000168913	-0.446615	0.226908	-0.296968	0.0503024	-0.560276	-0.81574	-0.867829	-0.227416	-0.0934477	0.317932	0.596868	0.83459	turquoise	ENHO
ENSG00000168916	-0.66906	-0.145784	-0.0362324	0.595043	0.0838103	-0.699988	-0.374543	0.0713829	0.355972	0.425488	0.661798	0.571055	turquoise	ZNF608
ENSG00000168928	-0.416452	0.361541	0.0472017	0.277799	-0.477908	-0.907126	-0.77046	-0.204102	-0.0366395	-0.0634857	0.581844	0.923763	turquoise	CTRB2
ENSG00000169116	-0.240119	0.597727	0.270455	0.328007	-0.340903	-0.913712	-0.815942	-0.301138	-0.109933	-0.345617	0.47466	0.980657	turquoise	PARM1
ENSG00000169174	-0.243438	0.595785	0.246208	0.305703	-0.377792	-0.909793	-0.792284	-0.263871	-0.0648137	-0.376465	0.483954	0.978401	turquoise	PCSK9
ENSG00000169213	0.0913421	0.824864	0.470506	0.217445	-0.292187	-0.734613	-0.818287	-0.550426	-0.257396	-0.538493	0.160139	0.86416	turquoise	RAB3B
ENSG00000169583	-0.270457	0.414116	-0.0794951	0.0799694	-0.492082	-0.794787	-0.932102	-0.427786	-0.22138	0.166602	0.438628	0.848892	turquoise	CLIC3
ENSG00000170153	-0.0880045	0.702783	0.312214	0.235499	-0.449731	-0.816581	-0.744724	-0.372538	0.064328	-0.475851	0.322905	0.905465	turquoise	RNF150
ENSG00000170271	-0.658358	0.138173	-0.18279	0.338788	-0.402907	-0.956393	-0.667279	0.103303	0.211361	0.0947314	0.82076	0.922781	turquoise	FAXDC2
ENSG00000170345	-0.354033	0.457919	0.0623032	0.22729	-0.457356	-0.905467	-0.756774	-0.109011	-0.079937	-0.281908	0.590579	0.960611	turquoise	FOS
ENSG00000170379	-0.567847	0.0432268	-0.00888812	0.376879	-0.0896307	-0.745533	-0.38593	0.334168	-0.144143	-0.186231	0.73035	0.723347	turquoise	TCAF2
ENSG00000170899	-0.620358	0.117695	-0.249125	0.264996	-0.370723	-0.906274	-0.761138	-0.0108669	0.038194	0.275518	0.769558	0.881592	turquoise	GSTA4
ENSG00000170915	-0.409357	0.443017	0.09966	0.340026	-0.363566	-0.965601	-0.808986	-0.167413	-0.0280347	-0.16939	0.627359	0.998634	turquoise	PAQR8
ENSG00000170962	-0.19699	0.627978	0.341842	0.361424	-0.274512	-0.894152	-0.816304	-0.354741	-0.140609	-0.361621	0.426301	0.963737	turquoise	PDGFD
ENSG00000171033	-0.320564	0.519821	0.215618	0.388103	-0.2508	-0.934621	-0.823405	-0.270219	-0.0492531	-0.203333	0.539137	0.977528	turquoise	PKIA
ENSG00000171105	-0.593745	0.237824	0.108052	0.534368	-0.178305	-0.963015	-0.545722	0.157668	0.224429	-0.219938	0.778774	0.933518	turquoise	INSR
ENSG00000171159	-0.123855	0.617165	0.236505	0.274591	-0.232933	-0.786998	-0.830182	-0.44274	-0.03123	-0.180434	0.336594	0.859559	turquoise	C9orf16
ENSG00000171222	-0.176434	0.374207	-0.136167	-0.0519086	-0.469466	-0.650912	-0.920888	-0.482043	-0.428126	0.253996	0.326617	0.722088	turquoise	SCAND1
ENSG00000171223	-0.354685	0.450968	0.110327	0.267672	-0.413797	-0.896349	-0.706712	-0.074054	-0.0661926	-0.337319	0.587954	0.946614	turquoise	JUNB
ENSG00000171345	-0.0123949	0.41175	-0.155409	-0.244722	-0.484944	-0.488727	-0.88515	-0.486451	-0.716481	0.143509	0.187775	0.608892	turquoise	KRT19
ENSG00000171346	-0.403293	0.406583	-0.0198331	0.221385	-0.44795	-0.932662	-0.871447	-0.208188	-0.145531	-0.0425411	0.615369	0.974848	turquoise	KRT15
ENSG00000171365	-0.159256	0.578475	0.632067	0.615135	0.102518	-0.775804	-0.49502	-0.175867	-0.0157388	-0.628284	0.359231	0.81365	turquoise	CLCN5
ENSG00000171604	0.061978	0.662948	0.309167	0.136972	-0.192023	-0.633796	-0.876776	-0.610565	-0.487941	-0.184239	0.141206	0.748704	turquoise	CXXC5
ENSG00000171798	0.176462	0.792216	0.125937	-0.199966	-0.678303	-0.608342	-0.920519	-0.625415	-0.416369	-0.348145	0.0780912	0.781242	turquoise	KNDC1
ENSG00000171914	-0.0231601	0.592153	0.0319787	-0.0732358	-0.600901	-0.607804	-0.615585	-0.207867	0.0348113	-0.446077	0.267133	0.72244	turquoise	TLN2
ENSG00000171992	0.148423	0.747068	0.35347	0.0641281	-0.43436	-0.613491	-0.855941	-0.730706	-0.328357	-0.264556	0.0294137	0.734832	turquoise	SYNPO
ENSG00000172348	-0.286788	0.528616	0.0477056	0.162168	-0.514437	-0.902437	-0.86318	-0.255025	-0.129311	-0.21295	0.527255	0.975659	turquoise	RCAN2
ENSG00000172478	-0.117226	0.586038	0.0980049	0.0415842	-0.552475	-0.777098	-0.922163	-0.483426	-0.364858	-0.14478	0.326644	0.876787	turquoise	C2orf54
ENSG00000172817	0.00906376	0.234125	-0.25013	-0.417446	-0.662271	-0.262937	-0.507315	-0.170688	-0.629849	-0.0769788	0.127505	0.373428	turquoise	CYP7B1
ENSG00000172915	-0.271771	0.56549	0.165809	0.266877	-0.396641	-0.919326	-0.846585	-0.27563	-0.109447	-0.273138	0.512518	0.987698	turquoise	NBEA
ENSG00000173535	-0.403301	0.459834	0.16892	0.410094	-0.289993	-0.96692	-0.760699	-0.144462	0.0539667	-0.233256	0.622098	0.993779	turquoise	TNFRSF10C
ENSG00000173868	-0.199897	0.614313	0.25434	0.294877	-0.414916	-0.886589	-0.843582	-0.424078	-0.0085256	-0.2439	0.403608	0.947954	turquoise	PHOSPHO1
ENSG00000173947	-0.250596	0.509695	0.0412724	0.148201	-0.574181	-0.814667	-0.687824	-0.186459	0.209069	-0.28726	0.46445	0.871959	turquoise	PIFO
ENSG00000174460	-0.364954	0.43884	-0.0695134	0.13996	-0.528681	-0.908312	-0.862989	-0.191055	-0.100392	-0.0917924	0.595448	0.966276	turquoise	ZCCHC12
ENSG00000174469	0.199401	0.84084	0.259854	-0.0988073	-0.570574	-0.622222	-0.873901	-0.607745	-0.390232	-0.480528	0.0652869	0.794935	turquoise	CNTNAP2
ENSG00000174498	-0.424135	0.367781	0.28154	0.493977	-0.194686	-0.906805	-0.601325	-0.0429646	-0.0360362	-0.330016	0.605414	0.911808	turquoise	IGDCC3
ENSG00000174938	-0.725744	0.0363157	0.184934	0.759471	0.0761017	-0.917351	-0.316211	0.333591	0.406353	-0.160838	0.839134	0.818399	turquoise	SEZ6L2
ENSG00000175040	-0.156749	0.657491	0.351416	0.330265	-0.28358	-0.857729	-0.741223	-0.275366	-0.0810506	-0.500345	0.409236	0.940349	turquoise	CHST2
ENSG00000175170	-0.224217	0.589792	0.301478	0.400011	-0.288748	-0.867107	-0.705466	-0.302313	0.238212	-0.326768	0.426663	0.908061	turquoise	FAM182B
ENSG00000175264	-0.684725	-0.0968764	-0.372246	0.244758	-0.254338	-0.779148	-0.654696	0.0733285	-0.0163867	0.509	0.771829	0.719167	turquoise	CHST1
ENSG00000175591	0.126764	0.644267	0.0303896	-0.254576	-0.607009	-0.535038	-0.884644	-0.532864	-0.667179	-0.233817	0.108805	0.700627	turquoise	P2RY2
ENSG00000175793	0.217619	0.762509	0.0722831	-0.293836	-0.694738	-0.531872	-0.902824	-0.615562	-0.53961	-0.328151	0.0349568	0.717147	turquoise	SFN
ENSG00000176244	-0.266855	0.573874	0.152462	0.253362	-0.451825	-0.919182	-0.840732	-0.294062	-0.0231141	-0.264511	0.500295	0.98455	turquoise	ACBD7
ENSG00000176533	-0.215042	0.611955	0.255726	0.289979	-0.426272	-0.900095	-0.826026	-0.362876	-0.0518474	-0.31333	0.433944	0.966539	turquoise	GNG7
ENSG00000176920	-0.64317	-0.189559	-0.602704	-0.0235408	-0.377332	-0.603447	-0.461413	0.373956	-0.0502484	0.351198	0.774302	0.57625	turquoise	FUT2
ENSG00000177000	-0.270457	0.571044	0.186653	0.285719	-0.385941	-0.916808	-0.809221	-0.243167	-0.0548596	-0.323859	0.514333	0.983439	turquoise	MTHFR
ENSG00000177606	-0.32888	0.451293	0.157903	0.274871	-0.404558	-0.868602	-0.673759	-0.0850525	-0.102747	-0.373866	0.551105	0.918731	turquoise	JUN
ENSG00000177728	-0.607474	0.0791401	-0.236204	0.207444	-0.379546	-0.82936	-0.554179	0.267407	-0.0372145	-0.0381198	0.794688	0.82248	turquoise	TMEM94
ENSG00000177791	-0.528715	0.317415	0.236228	0.621564	-0.0619184	-0.973361	-0.620223	-0.0162659	0.205937	-0.171753	0.700912	0.944571	turquoise	MYOZ1
ENSG00000177854	-0.443498	0.329166	0.0741904	0.409143	-0.180498	-0.903909	-0.794863	-0.214568	-0.0192188	0.0753093	0.608151	0.904248	turquoise	TMEM187
ENSG00000178075	-0.493022	0.270086	0.0244618	0.36952	-0.229607	-0.862525	-0.533424	0.174548	0.138451	-0.26937	0.707577	0.868238	turquoise	GRAMD1C
ENSG00000178115	-0.698592	-0.189688	-0.271406	0.348209	-0.307914	-0.638242	-0.113406	0.464132	0.709499	0.0899297	0.744197	0.527939	turquoise	GOLGA8Q
ENSG00000178202	0.127592	0.74243	0.679079	0.422589	0.0450599	-0.616112	-0.662418	-0.593867	-0.243041	-0.482924	0.0481253	0.704482	turquoise	KDELC2
ENSG00000178401	-0.769753	0.0018782	-0.16202	0.48207	-0.236685	-0.94847	-0.525358	0.262445	0.330594	0.121437	0.900619	0.871756	turquoise	DNAJC22
ENSG00000178537	-0.316898	0.0424702	-0.423464	-0.0730445	-0.290819	-0.464068	-0.66432	-0.20013	-0.11147	0.56484	0.399756	0.471201	turquoise	SLC25A20
ENSG00000178662	-0.720383	-0.0206101	0.246638	0.836495	0.141844	-0.853744	-0.208079	0.310692	0.566621	-0.107403	0.777618	0.723562	turquoise	CSRNP3
ENSG00000178977	-0.387233	0.458318	0.0788212	0.32602	-0.374265	-0.944379	-0.790429	-0.177186	0.0993819	-0.158719	0.604175	0.976724	turquoise	LINC00324
ENSG00000179023	-0.213635	0.607138	0.172609	0.210081	-0.466895	-0.895176	-0.87535	-0.354875	-0.142421	-0.274894	0.450471	0.975753	turquoise	KLHDC7A
ENSG00000179314	-0.263473	0.527004	-0.025534	0.0848083	-0.563279	-0.868486	-0.871747	-0.258595	-0.11399	-0.177427	0.509099	0.950456	turquoise	WSCD1
ENSG00000179627	0.109659	0.800658	0.674384	0.396923	-0.0988206	-0.666669	-0.567001	-0.414201	-0.0534752	-0.760421	0.116879	0.768829	turquoise	ZBTB42
ENSG00000179743	-0.636146	0.148165	0.0031696	0.446504	-0.310553	-0.947124	-0.584785	0.119268	0.100227	-0.0625037	0.783936	0.907841	turquoise	FLJ37453
ENSG00000179954	0.0400453	0.72775	0.653379	0.446605	0.0071985	-0.676933	-0.533316	-0.305493	-0.107915	-0.744876	0.191452	0.767571	turquoise	SSC5D
ENSG00000181035	-0.795659	-0.161888	-0.368676	0.317103	-0.224032	-0.836263	-0.551988	0.301241	0.0110453	0.359781	0.905962	0.763213	turquoise	SLC25A42
ENSG00000181804	-0.0703954	0.561503	0.353957	0.326862	-0.289364	-0.623334	-0.402467	-0.220011	0.486736	-0.495631	0.230379	0.661175	turquoise	SLC9A9
ENSG00000182179	-0.363765	0.387897	0.5315	0.739201	0.188405	-0.820738	-0.364801	0.0619118	0.222081	-0.532078	0.536979	0.80255	turquoise	UBA7
ENSG00000182220	-0.758894	-0.0577505	0.0405115	0.647122	-0.0636494	-0.893616	-0.415637	0.210586	0.272599	0.120272	0.821083	0.783079	turquoise	ATP6AP2
ENSG00000182310	-0.526744	-0.0874991	-0.20872	0.292775	-0.00149718	-0.603612	-0.571875	-0.0557832	-0.133922	0.531397	0.570701	0.545241	turquoise	SPACA6
ENSG00000182379	-0.206838	0.595956	0.127489	0.157875	-0.475434	-0.874381	-0.877157	-0.320401	-0.21329	-0.281307	0.456833	0.965084	turquoise	NXPH4
ENSG00000182489	-0.358181	0.49957	0.158857	0.341706	-0.393451	-0.95547	-0.789612	-0.202949	0.028615	-0.249587	0.577951	0.995434	turquoise	XKRX
ENSG00000182568	-0.482772	0.346015	-0.0271186	0.296872	-0.391659	-0.947452	-0.741099	-0.0184439	0.0389247	-0.137033	0.702562	0.969244	turquoise	SATB1
ENSG00000182606	-0.388122	0.334071	-0.0189097	0.264613	-0.335924	-0.789489	-0.535788	0.0678844	0.299023	-0.238624	0.594546	0.808706	turquoise	TRAK1
ENSG00000182621	-0.0839844	0.71678	0.350577	0.298199	-0.311359	-0.835589	-0.827592	-0.461022	-0.0246002	-0.372695	0.317136	0.92286	turquoise	PLCB1
ENSG00000182632	-0.0066052	0.466605	0.287639	0.115877	-0.153221	-0.470244	-0.377238	-0.0130695	-0.360102	-0.646002	0.230623	0.571356	turquoise	CCNYL2
ENSG00000182670	-0.141283	0.673448	0.275491	0.247943	-0.366699	-0.865657	-0.845393	-0.36931	-0.156723	-0.388038	0.394475	0.959447	turquoise	TTC3
ENSG00000182809	-0.599943	-0.103961	-0.528335	0.0543993	-0.441377	-0.657683	-0.616314	0.0201937	0.17297	0.603447	0.665075	0.606234	turquoise	CRIP2
ENSG00000182985	-0.436895	0.316181	0.0897513	0.411085	-0.361003	-0.868398	-0.6434	-0.19785	0.362421	0.0105564	0.553511	0.841871	turquoise	CADM1
ENSG00000183114	-0.26836	0.511953	0.174047	0.28809	-0.27128	-0.877196	-0.87349	-0.329315	-0.270284	-0.144121	0.485536	0.938693	turquoise	FAM43B
ENSG00000183186	-0.348543	0.462268	0.128356	0.322879	-0.26825	-0.917263	-0.84086	-0.225582	-0.181754	-0.144108	0.571074	0.964442	turquoise	C2CD4C
ENSG00000183196	-0.346091	0.475882	0.353077	0.498645	-0.194992	-0.903075	-0.582489	-0.06087	0.0776333	-0.476943	0.555962	0.926533	turquoise	CHST6
ENSG00000183579	-0.320536	0.503596	0.100415	0.240492	-0.42255	-0.920734	-0.840709	-0.221148	-0.159258	-0.226883	0.556519	0.983035	turquoise	ZNRF3
ENSG00000183671	-0.535303	0.0232219	0.31987	0.752808	0.125612	-0.643501	0.0285021	0.341318	0.786722	-0.310726	0.573974	0.526502	turquoise	GPR1
ENSG00000183690	-0.39853	0.0783908	-0.612389	-0.264617	-0.672291	-0.595686	-0.761624	-0.0721517	-0.185983	0.433013	0.549996	0.636316	turquoise	EFHC2
ENSG00000183770	0.252548	0.784498	0.557845	0.189795	-0.0752912	-0.516108	-0.759839	-0.706236	-0.480879	-0.409547	-0.0598882	0.648791	turquoise	FOXL2
ENSG00000183779	-0.235316	0.543337	0.0286689	0.100823	-0.505984	-0.864218	-0.921159	-0.332331	-0.271898	-0.151452	0.476211	0.952289	turquoise	ZNF703
ENSG00000183873	-0.0191252	0.681754	0.672052	0.544406	0.0809877	-0.725137	-0.623499	-0.437448	-0.117608	-0.519712	0.204906	0.786252	turquoise	SCN5A
ENSG00000184012	-0.327074	0.517936	0.166241	0.311881	-0.389627	-0.942151	-0.823269	-0.240303	-0.0810394	-0.247403	0.552396	0.993627	turquoise	TMPRSS2
ENSG00000184292	-0.553872	0.237058	0.341923	0.721099	0.00584512	-0.929332	-0.479931	0.0341774	0.232089	-0.213606	0.676075	0.870132	turquoise	TACSTD2
ENSG00000184304	-0.0511492	0.72622	0.472886	0.374672	-0.153098	-0.793457	-0.712497	-0.358352	-0.0688967	-0.55416	0.300056	0.884863	turquoise	PRKD1
ENSG00000184347	-0.322107	0.51778	0.305944	0.43766	-0.224721	-0.923844	-0.698895	-0.143652	-0.0366605	-0.406868	0.550449	0.965827	turquoise	SLIT3
ENSG00000184481	-0.498322	0.332839	-0.0293909	0.328288	-0.356527	-0.963847	-0.800064	-0.100545	0.0285476	-0.0118539	0.698464	0.975149	turquoise	FOXO4
ENSG00000184500	-0.434509	0.298261	0.464729	0.773475	0.150413	-0.805938	-0.264654	0.128	0.517445	-0.447123	0.567628	0.751166	turquoise	PROS1
ENSG00000184599	-0.517948	0.332148	0.0780162	0.415773	-0.325344	-0.985871	-0.726178	-0.0448958	0.0451492	-0.138273	0.712136	0.986869	turquoise	FAM19A3
ENSG00000184678	-0.262424	0.5618	0.136499	0.232477	-0.447199	-0.890196	-0.774198	-0.205448	0.00806749	-0.342193	0.508827	0.959743	turquoise	HIST2H2BE
ENSG00000184828	-0.640697	-0.112996	-0.579433	0.0176796	-0.525493	-0.697623	-0.631459	0.0800927	0.141571	0.568084	0.723269	0.651265	turquoise	ZBTB7C
ENSG00000184897	-0.273815	0.52887	0.0719739	0.172402	-0.458874	-0.893001	-0.882726	-0.278265	-0.22675	-0.198121	0.514348	0.969778	turquoise	H1FX
ENSG00000184898	-0.364201	0.464478	0.301694	0.465114	-0.297129	-0.923183	-0.635565	-0.132378	0.111466	-0.372706	0.553623	0.939566	turquoise	RBM43
ENSG00000184985	-0.109952	0.662275	0.477513	0.434991	-0.0823969	-0.820571	-0.764561	-0.405979	-0.179283	-0.408966	0.33018	0.892866	turquoise	SORCS2
ENSG00000185015	-0.401784	-0.173939	-0.83186	-0.444224	-0.669978	-0.3485	-0.562616	0.0772406	-0.256503	0.62528	0.487516	0.368658	turquoise	CA13
ENSG00000185112	-0.250866	0.537374	0.0444622	0.127663	-0.475589	-0.869032	-0.875411	-0.261901	-0.237279	-0.219086	0.502125	0.955353	turquoise	FAM43A
ENSG00000185269	-0.254574	0.518134	0.209148	0.290482	-0.312759	-0.871577	-0.859865	-0.3596	-0.270952	-0.163801	0.457189	0.93042	turquoise	NOTUM
ENSG00000185432	-0.493912	0.333359	-0.0669069	0.279692	-0.417555	-0.958516	-0.805221	-0.0911945	0.0163273	-0.0186417	0.699174	0.975974	turquoise	METTL7A
ENSG00000185630	-0.554132	0.110171	-0.390273	0.0835405	-0.550485	-0.816618	-0.76589	-0.0703179	0.0965034	0.367896	0.688306	0.804634	turquoise	PBX1
ENSG00000185664	-0.552684	0.299117	0.0610274	0.443379	-0.287876	-0.992723	-0.709768	-0.00743465	0.0800123	-0.110095	0.743503	0.984111	turquoise	PMEL
ENSG00000185880	-0.00691323	0.150934	-0.475524	-0.380751	-0.473668	-0.174143	-0.542362	-0.32742	-0.00829162	0.464405	0.0803057	0.233133	turquoise	TRIM69
ENSG00000185920	0.166905	0.815922	0.44843	0.157211	-0.189697	-0.636216	-0.823799	-0.592464	-0.392469	-0.472927	0.0838968	0.780327	turquoise	PTCH1
ENSG00000186350	-0.113469	0.682338	0.22853	0.176111	-0.421478	-0.845854	-0.88834	-0.414447	-0.222624	-0.343737	0.368376	0.95079	turquoise	RXRA
ENSG00000186480	-0.129234	0.663394	0.13634	0.106633	-0.532842	-0.841189	-0.884492	-0.392255	-0.134552	-0.309287	0.382783	0.945483	turquoise	INSIG1
ENSG00000186642	-0.301942	0.458298	0.437141	0.551144	-0.00280279	-0.852458	-0.626289	-0.167493	-0.16406	-0.374756	0.489288	0.875583	turquoise	PDE2A
ENSG00000186897	-0.534599	0.312472	0.0191179	0.380591	-0.371378	-0.979851	-0.705689	0.000715466	0.108135	-0.133643	0.732558	0.979814	turquoise	C1QL4
ENSG00000186951	-0.225524	0.595939	0.226715	0.325478	-0.349723	-0.884358	-0.800081	-0.349241	0.117839	-0.2488	0.439495	0.938553	turquoise	PPARA
ENSG00000186952	-0.589402	-0.0147383	-0.0724352	0.419288	0.0391948	-0.747805	-0.585034	0.0553672	-0.216461	0.279516	0.688359	0.69877	turquoise	TMEM232
ENSG00000186998	-0.466887	0.395191	0.158583	0.454501	-0.268574	-0.986027	-0.745243	-0.112348	0.050691	-0.175355	0.665976	0.993893	turquoise	EMID1
ENSG00000187187	-0.270594	0.494334	0.0324653	0.201604	-0.353024	-0.851056	-0.886466	-0.333904	-0.0967543	-0.0303317	0.486188	0.911147	turquoise	ZNF546
ENSG00000187210	-0.112004	0.655016	0.621575	0.592163	0.0426316	-0.798034	-0.598949	-0.337838	0.0807076	-0.530342	0.307081	0.841748	turquoise	GCNT1
ENSG00000187554	-0.474936	0.375102	0.161567	0.482032	-0.269475	-0.954428	-0.615706	-0.0106886	0.289579	-0.258652	0.668247	0.948671	turquoise	TLR5
ENSG00000187605	-0.149789	0.591425	0.288548	0.272855	-0.398891	-0.761635	-0.551352	-0.160508	0.211769	-0.557102	0.371156	0.826299	turquoise	TET3
ENSG00000187634	-0.366786	0.451569	-0.0202594	0.182209	-0.51067	-0.926301	-0.865672	-0.213854	-0.0964542	-0.106656	0.591487	0.979919	turquoise	SAMD11
ENSG00000187730	-0.455122	0.328814	-0.110843	0.189564	-0.486115	-0.922244	-0.865661	-0.179057	-0.132707	0.0663237	0.647898	0.950895	turquoise	GABRD
ENSG00000187867	-0.561058	0.146576	0.00531027	0.469383	-0.221091	-0.864379	-0.638191	-0.127685	0.257408	0.228323	0.642791	0.80396	turquoise	PALM3
ENSG00000188001	-0.422503	0.0607542	-0.334612	0.102984	-0.255631	-0.601338	-0.646939	-0.131625	0.0965037	0.4789	0.51339	0.582575	turquoise	TPRG1
ENSG00000188153	-0.502472	0.260252	0.372897	0.713091	0.16349	-0.875671	-0.430862	0.137166	0.101735	-0.348357	0.670117	0.840956	turquoise	COL4A5
ENSG00000188162	-0.346722	0.171683	-0.0747017	0.0603722	-0.487372	-0.619025	-0.457473	0.0844276	-0.233789	-0.202276	0.493173	0.647661	turquoise	OTOG
ENSG00000188176	-0.385661	0.285507	-0.0532672	0.182862	-0.547621	-0.800671	-0.740199	-0.275602	0.025686	0.119892	0.498167	0.804191	turquoise	SMTNL2
ENSG00000188290	0.189716	0.771211	0.447078	0.141247	-0.14097	-0.576785	-0.825533	-0.648621	-0.502932	-0.37402	0.0323224	0.716127	turquoise	HES4
ENSG00000188488	-0.586778	0.245422	0.00541644	0.424413	-0.279802	-0.972922	-0.653871	0.0959511	0.0970254	-0.123379	0.782784	0.960261	turquoise	SERPINA5
ENSG00000188508	-0.288059	0.501105	0.0163158	0.164408	-0.565707	-0.881552	-0.868574	-0.354868	0.0353918	-0.0598924	0.482116	0.9331	turquoise	KRTDAP
ENSG00000188559	-0.298144	0.53635	0.147138	0.312472	-0.358512	-0.910654	-0.794055	-0.246765	0.0937033	-0.228698	0.52398	0.959867	turquoise	RALGAPA2
ENSG00000188690	0.126303	0.421923	-0.335713	-0.506208	-0.631689	-0.319918	-0.873582	-0.541642	-0.69536	0.224427	0.0502221	0.47229	turquoise	UROS
ENSG00000188747	-0.720604	-0.00372317	-0.32106	0.288768	-0.371966	-0.903981	-0.675916	0.12104	0.113204	0.32544	0.847555	0.851655	turquoise	NOXA1
ENSG00000188833	-0.517333	0.328881	0.145214	0.503418	-0.163443	-0.978548	-0.702548	-0.031314	0.041034	-0.145382	0.712577	0.972905	turquoise	ENTPD8
ENSG00000189120	-0.399429	0.35245	-0.159688	0.0916301	-0.51251	-0.876163	-0.886986	-0.183275	-0.235269	0.049062	0.61338	0.928425	turquoise	SP6
ENSG00000189212	-0.216296	0.542287	-0.000183146	0.0427231	-0.561177	-0.836974	-0.89678	-0.301352	-0.293368	-0.193945	0.463877	0.933987	turquoise	DPY19L2P1
ENSG00000189221	-0.327274	0.496388	0.158534	0.343079	-0.249611	-0.909191	-0.782945	-0.176214	-0.0546692	-0.24458	0.564845	0.959285	turquoise	MAOA
ENSG00000196139	-0.573587	0.238925	-0.0345476	0.385195	-0.321164	-0.938925	-0.600747	0.138979	0.205123	-0.149863	0.770828	0.926818	turquoise	AKR1C3
ENSG00000196177	-0.150561	0.630619	0.274145	0.224318	-0.391501	-0.836245	-0.784432	-0.300134	-0.231585	-0.443575	0.398191	0.92942	turquoise	ACADSB
ENSG00000196189	-0.424811	0.427753	0.147638	0.400439	-0.307438	-0.952792	-0.692466	-0.050822	0.0948348	-0.292652	0.647479	0.976412	turquoise	SEMA4A
ENSG00000196337	-0.487383	0.133773	0.0123966	0.397017	-0.275987	-0.69674	-0.227251	0.258512	0.645353	-0.236754	0.604686	0.64634	turquoise	CGB7
ENSG00000196569	-0.55924	0.0588319	-0.0148961	0.341421	-0.350155	-0.745057	-0.311858	0.287973	0.178282	-0.21827	0.67835	0.704279	turquoise	LAMA2
ENSG00000196743	-0.51079	0.326392	0.0190889	0.353468	-0.368166	-0.975602	-0.766351	-0.0652907	-0.0176515	-0.0873928	0.708849	0.984749	turquoise	GM2A
ENSG00000196872	0.162579	0.791286	0.371448	0.0703822	-0.28061	-0.628003	-0.873926	-0.617777	-0.509853	-0.403972	0.0847318	0.779637	turquoise	KIAA1211L
ENSG00000196914	0.111415	0.838681	0.409245	0.132558	-0.404845	-0.721036	-0.826269	-0.55187	-0.235601	-0.548215	0.147077	0.861223	turquoise	ARHGEF12
ENSG00000197043	-0.266056	0.474247	-0.0387202	0.10094	-0.523817	-0.842586	-0.942156	-0.415459	-0.173323	0.0640916	0.457444	0.904943	turquoise	ANXA6
ENSG00000197177	-0.0931301	0.712474	0.453254	0.371251	-0.277159	-0.845857	-0.769715	-0.430718	-0.0560672	-0.470757	0.316083	0.924894	turquoise	ADGRA1
ENSG00000197444	-0.405823	0.449841	0.119967	0.353741	-0.34955	-0.962682	-0.777811	-0.134762	-0.000925506	-0.222587	0.629726	0.996387	turquoise	OGDHL
ENSG00000197496	-0.428023	0.405849	0.0161194	0.263991	-0.465792	-0.950273	-0.791238	-0.120123	-0.0265865	-0.157951	0.644745	0.984769	turquoise	SLC2A10
ENSG00000197563	-0.112791	0.590988	0.489999	0.508035	0.039401	-0.752715	-0.69919	-0.45365	-0.016555	-0.252595	0.278052	0.792221	turquoise	PIGN
ENSG00000197565	-0.620165	0.124924	0.12934	0.553967	-0.0855506	-0.902032	-0.494444	0.187731	-0.00297104	-0.154696	0.767833	0.857872	turquoise	COL4A6
ENSG00000197859	-0.464386	0.367448	-0.0240569	0.281709	-0.411431	-0.959464	-0.820316	-0.121406	-0.039859	-0.059371	0.675629	0.98535	turquoise	ADAMTSL2
ENSG00000197892	-0.18551	0.634166	0.455602	0.494466	-0.173771	-0.86371	-0.658834	-0.303965	0.189907	-0.459705	0.391457	0.906677	turquoise	KIF13B
ENSG00000198478	-0.167469	0.616474	0.228965	0.243847	-0.420786	-0.85775	-0.888452	-0.484233	-0.110988	-0.181065	0.367447	0.928148	turquoise	SH3BGRL2
ENSG00000198576	-0.339347	0.474255	0.0745131	0.226609	-0.442281	-0.906205	-0.779188	-0.135525	-0.116179	-0.277481	0.579346	0.965939	turquoise	ARC
ENSG00000198740	-0.495075	0.296323	-0.159413	0.209142	-0.480313	-0.927661	-0.830917	-0.129859	0.0298362	0.105331	0.682855	0.942084	turquoise	ZNF652
ENSG00000198911	-0.36769	0.496553	0.293999	0.486526	-0.245785	-0.960856	-0.716567	-0.185734	0.100771	-0.310123	0.570928	0.98146	turquoise	SREBF2
ENSG00000198937	-0.492052	-0.0266695	-0.672261	-0.240807	-0.720079	-0.60735	-0.704707	-0.000779641	-0.0921312	0.511152	0.609634	0.617929	turquoise	CCDC167
ENSG00000202198	0.12458	0.349931	-0.510908	-0.647879	-0.772338	-0.235458	-0.792715	-0.461274	-0.527991	0.286605	0.0393742	0.384434	turquoise	RN7SK
ENSG00000203814	0.256123	0.4733	-0.418328	-0.714074	-0.861881	-0.183463	-0.725457	-0.465954	-0.492868	0.0329246	-0.0635881	0.365158	turquoise	HIST2H2BF
ENSG00000203943	-0.445899	0.200325	0.126602	0.468262	0.0975709	-0.777775	-0.637157	-0.0588387	-0.227575	0.0428569	0.595845	0.767475	turquoise	SAMD13
ENSG00000204060	-0.114145	0.611834	0.086175	0.0379154	-0.477953	-0.787116	-0.926504	-0.405338	-0.411502	-0.221446	0.366405	0.903248	turquoise	FOXO6
ENSG00000204179	0.000808881	0.403209	0.501681	0.430107	0.398286	-0.422969	-0.421903	-0.241737	-0.416008	-0.309782	0.142594	0.472906	turquoise	PTPN20
ENSG00000204186	-0.127424	0.684192	0.32602	0.267112	-0.405275	-0.855756	-0.784688	-0.358048	-0.0754544	-0.464175	0.369276	0.944265	turquoise	ZDBF2
ENSG00000204217	0.0397584	0.80261	0.458867	0.250014	-0.323408	-0.772737	-0.80251	-0.512727	-0.169604	-0.536836	0.206325	0.889355	turquoise	BMPR2
ENSG00000204262	0.0281428	0.751148	0.530146	0.326005	-0.212484	-0.74764	-0.770688	-0.533757	-0.250091	-0.489434	0.185273	0.846977	turquoise	COL5A2
ENSG00000204335	0.146082	0.710568	0.162761	-0.157928	-0.618307	-0.577877	-0.871801	-0.606369	-0.533816	-0.308953	0.0741387	0.73338	turquoise	SP5
ENSG00000204709	-0.481397	0.10499	-0.448672	-0.0793215	-0.583202	-0.698045	-0.612646	0.169741	-0.0535387	0.0872148	0.675341	0.728058	turquoise	LINC01556
ENSG00000205336	-0.472612	0.348485	0.395303	0.705415	-0.0313728	-0.927847	-0.482478	-0.0129437	0.349426	-0.330135	0.619052	0.887708	turquoise	ADGRG1
ENSG00000205978	-0.312764	0.541239	0.185343	0.329705	-0.363649	-0.940267	-0.806596	-0.23244	-0.0137844	-0.281633	0.545504	0.993094	turquoise	NYNRIN
ENSG00000206549	-0.609338	-0.0841023	0.0560222	0.597602	0.330628	-0.678059	-0.359991	0.240948	-0.0543984	0.146368	0.697385	0.600477	turquoise	PRSS50
ENSG00000213420	-0.506481	0.192038	-0.241994	0.120682	-0.584553	-0.85447	-0.798895	-0.150703	-0.0512973	0.235011	0.643941	0.855671	turquoise	GPC2
ENSG00000213626	-0.253519	0.57633	0.156297	0.250628	-0.427083	-0.914065	-0.885382	-0.355584	-0.0935849	-0.20106	0.479727	0.980981	turquoise	LBH
ENSG00000214357	-0.207315	0.628417	0.299789	0.332007	-0.313804	-0.900568	-0.810193	-0.314328	-0.101145	-0.381775	0.449086	0.973949	turquoise	NEURL1B
ENSG00000215386	-0.0776022	0.274313	-0.175725	-0.196532	-0.322332	-0.363087	-0.434559	0.0814382	-0.406669	-0.273301	0.298511	0.468913	turquoise	MIR99AHG
ENSG00000221890	-0.34975	0.490784	0.416776	0.591995	-0.0919382	-0.934518	-0.655759	-0.18801	0.0824551	-0.353295	0.536766	0.944065	turquoise	NPTXR
ENSG00000221968	-0.743476	-0.0744694	0.130939	0.707014	0.0527656	-0.853753	-0.320497	0.284701	0.220967	0.00875489	0.805395	0.740796	turquoise	FADS3
ENSG00000223298	0.103954	0.440983	0.204629	-0.0830319	-0.528162	-0.350139	-0.443841	-0.377443	-0.298167	-0.329806	-0.00303363	0.43588	turquoise	RNY3P8
ENSG00000223573	-0.460457	0.339674	0.0126415	0.327187	-0.262922	-0.928042	-0.796576	-0.094357	-0.133508	-0.0518082	0.672076	0.952015	turquoise	TINCR
ENSG00000224189	-0.0366863	0.739873	0.338885	0.247856	-0.306678	-0.80164	-0.84784	-0.489885	-0.0957092	-0.373238	0.27939	0.90356	turquoise	HAGLR
ENSG00000224389	-0.777806	-0.0666291	-0.302189	0.350767	-0.319922	-0.910601	-0.612145	0.20226	0.125227	0.312118	0.891627	0.840211	turquoise	C4B
ENSG00000224914	-0.026592	0.739369	0.345098	0.200041	-0.343547	-0.785556	-0.79828	-0.390061	-0.220617	-0.518925	0.293696	0.903926	turquoise	LINC00863
ENSG00000225434	-0.554392	-0.079651	-0.04879	0.333816	-0.266867	-0.579685	-0.0525036	0.469099	0.357385	-0.252361	0.632877	0.512941	turquoise	LINC01504
ENSG00000225766	-0.362187	0.319645	-0.213256	0.0760589	-0.456775	-0.762005	-0.707724	-0.065053	0.114367	0.00881478	0.569747	0.802826	turquoise	DHRS4L1
ENSG00000226608	-0.578698	-0.220087	-0.461667	0.0773067	-0.531596	-0.500776	-0.284289	0.137439	0.514241	0.485281	0.556079	0.405278	turquoise	FTLP3
ENSG00000227630	-0.639419	0.160726	-0.118616	0.347049	-0.40262	-0.961776	-0.663509	0.104736	0.0927031	0.00811541	0.808674	0.937007	turquoise	LINC01132
ENSG00000229891	-0.0652554	0.283813	-0.185447	-0.16034	-0.401998	-0.430924	-0.817083	-0.543587	-0.48614	0.401118	0.156843	0.4984	turquoise	LINC01315
ENSG00000230804	-0.401126	-0.0318175	-0.343075	-0.0755671	-0.506338	-0.520421	-0.590777	-0.0953058	-0.380887	0.378639	0.457917	0.518244	turquoise	C2orf27AP3
ENSG00000231738	-0.181221	0.496817	0.155604	0.163307	-0.556218	-0.756371	-0.741374	-0.412431	-0.0300319	-0.152089	0.326849	0.805464	turquoise	TSPAN19
ENSG00000232859	-0.566881	0.272483	0.159644	0.588408	-0.10325	-0.965077	-0.572089	0.078686	0.283155	-0.177579	0.744025	0.931471	turquoise	LYRM9
ENSG00000233901	-0.314333	0.103782	-0.299559	0.0391092	-0.275782	-0.523489	-0.674263	-0.276715	0.012926	0.520637	0.38447	0.518484	turquoise	LINC01503
ENSG00000235169	-0.217218	0.482813	-0.138794	-0.0103375	-0.636218	-0.769842	-0.869186	-0.373004	0.04357	0.039191	0.413279	0.83973	turquoise	SMIM1
ENSG00000235823	-0.509383	0.257344	-0.23173	0.134459	-0.527842	-0.906743	-0.81913	-0.0589289	-0.0729264	0.093131	0.708707	0.930066	turquoise	OLMALINC
ENSG00000236204	0.113274	0.705654	0.0570812	-0.132199	-0.470894	-0.580434	-0.857409	-0.499347	-0.291637	-0.257241	0.146679	0.733672	turquoise	LINC01376
ENSG00000236384	-0.807306	-0.176484	-0.414666	0.286931	-0.287474	-0.837057	-0.561616	0.287015	0.0581743	0.408873	0.908073	0.759889	turquoise	LINC00479
ENSG00000237854	-0.355865	0.3705	-0.135453	0.044899	-0.561986	-0.842175	-0.855994	-0.175038	-0.307145	-0.036855	0.573521	0.906889	turquoise	LINC00674
ENSG00000239521	-0.56121	0.221703	-0.112451	0.289994	-0.516993	-0.917742	-0.630286	0.038532	0.273088	-0.0335308	0.720492	0.899385	turquoise	GATS
ENSG00000239650	-0.568188	0.220965	0.0134608	0.464979	-0.274694	-0.906259	-0.519262	0.107499	0.459757	-0.105923	0.724718	0.866599	turquoise	GUSBP4
ENSG00000239827	-0.520366	0.0531562	-0.0947813	0.32019	-0.400055	-0.66676	-0.225443	0.24009	0.660113	-0.0989093	0.600616	0.602514	turquoise	SUGT1P3
ENSG00000239881	-0.301914	0.332106	-0.117265	0.0107197	-0.641294	-0.751548	-0.804885	-0.295426	-0.245958	0.0653579	0.45157	0.798933	turquoise	RPS27P25
ENSG00000240270	-0.282387	0.171437	-0.210901	-0.0679582	-0.741634	-0.523056	-0.386767	-0.0247326	0.262854	-0.0586341	0.370851	0.533141	turquoise	RPL12P37
ENSG00000241104	-0.24002	0.588027	0.308119	0.378618	-0.228526	-0.903163	-0.802473	-0.289318	-0.141199	-0.342349	0.475225	0.966684	turquoise	CEACAMP10
ENSG00000241458	0.135748	0.485928	-0.0598917	-0.270426	-0.307808	-0.353783	-0.744715	-0.384643	-0.751484	-0.111049	0.086368	0.509042	turquoise	RPL7P19
ENSG00000242498	-0.318648	0.505123	0.0472243	0.191377	-0.50424	-0.914091	-0.831371	-0.20905	-0.0767868	-0.225016	0.55618	0.97817	turquoise	ARPIN
ENSG00000243244	-0.436475	0.418438	0.109918	0.388365	-0.298828	-0.970753	-0.783991	-0.133614	0.0126256	-0.158122	0.650852	0.993552	turquoise	STON1
ENSG00000243449	0.154842	0.59364	0.223226	0.000370615	-0.0970035	-0.445774	-0.785869	-0.554271	-0.639847	-0.146626	0.0450231	0.578557	turquoise	C4orf48
ENSG00000243566	-0.447155	0.339737	0.0656467	0.395752	-0.240067	-0.920061	-0.807504	-0.230355	0.00864561	0.0737529	0.609939	0.920405	turquoise	UPK3B
ENSG00000243649	-0.544213	0.283533	-0.0623389	0.310663	-0.453733	-0.966516	-0.725968	-0.00781389	0.0962643	-0.0640959	0.734765	0.967221	turquoise	CFB
ENSG00000244731	-0.785595	-0.0679008	-0.271994	0.384011	-0.285891	-0.918209	-0.597657	0.217613	0.124014	0.287708	0.899721	0.844689	turquoise	C4A
ENSG00000248334	-0.674476	-0.0142164	0.201635	0.761627	0.0564158	-0.789886	-0.133385	0.340275	0.712717	-0.15319	0.72887	0.664321	turquoise	WHAMMP2
ENSG00000248485	-0.28797	0.516776	0.0351825	0.153364	-0.507046	-0.89982	-0.896973	-0.292868	-0.190092	-0.151711	0.520738	0.972432	turquoise	PCP4L1
ENSG00000249242	-0.421136	0.41473	0.382799	0.619284	-0.0666022	-0.943611	-0.604143	-0.0821143	0.0857789	-0.346807	0.603033	0.938253	turquoise	TMEM150C
ENSG00000250722	-0.597071	0.24465	-0.0211135	0.417692	-0.324446	-0.987506	-0.683742	0.0510974	0.155533	-0.0580928	0.781738	0.968954	turquoise	SEPP1
ENSG00000252147	-0.337101	0.484803	0.0692932	0.229339	-0.429194	-0.916229	-0.814228	-0.168638	-0.125419	-0.240353	0.578539	0.977212	turquoise	RNY3P16
ENSG00000253203	-0.177723	0.633431	0.514296	0.530883	-0.0910701	-0.867064	-0.696324	-0.347628	0.0189697	-0.440739	0.37976	0.912362	turquoise	GUSBP3
ENSG00000253958	-0.415898	0.31917	0.306862	0.552655	-0.199993	-0.853953	-0.548292	-0.168535	0.21635	-0.15783	0.518624	0.819939	turquoise	CLDN23
ENSG00000255769	-0.279142	0.431933	0.41101	0.530414	0.0635578	-0.806345	-0.656717	-0.225076	-0.246183	-0.260024	0.452377	0.82947	turquoise	GOLGA2P10
ENSG00000256340	-0.320996	0.422067	-0.0842507	0.0792267	-0.643805	-0.81769	-0.692072	-0.102819	0.129429	-0.215265	0.534077	0.870758	turquoise	ABCC6P1
ENSG00000257800	0.144676	0.735827	0.77159	0.463772	0.0424994	-0.546543	-0.355046	-0.305028	0.0281296	-0.871524	0.0507795	0.630767	turquoise	FNBP1P1
ENSG00000258701	-0.377619	0.250205	0.249827	0.483595	0.148012	-0.733767	-0.53043	0.0263707	-0.30185	-0.208508	0.552384	0.742076	turquoise	LINC00638
ENSG00000258818	-0.592334	0.20996	-0.121986	0.320379	-0.404829	-0.937526	-0.63507	0.124089	0.198208	-0.0641623	0.782499	0.924847	turquoise	RNASE4
ENSG00000259527	0.0310036	0.572112	0.736755	0.587098	0.197986	-0.49879	-0.143489	-0.0902476	0.323385	-0.834185	0.127315	0.531798	turquoise	LINC00052
ENSG00000259726	-0.402326	0.438978	0.123822	0.337458	-0.366987	-0.946468	-0.742512	-0.0953285	-0.030879	-0.272632	0.627925	0.982739	turquoise	CSPG4P11
ENSG00000260804	-0.233418	0.460523	-0.0287714	0.0457035	-0.4402	-0.786578	-0.892846	-0.286515	-0.452906	-0.0846003	0.464796	0.876664	turquoise	PKI55
ENSG00000261150	0.0749651	0.756322	0.505421	0.227883	-0.341476	-0.683263	-0.665742	-0.448838	-0.201798	-0.636955	0.145892	0.795767	turquoise	EPPK1
ENSG00000263001	0.0549394	0.778247	0.264282	0.0640417	-0.422065	-0.729985	-0.876243	-0.497462	-0.296364	-0.433873	0.217451	0.872276	turquoise	GTF2I
ENSG00000263961	-0.525857	0.277315	-0.14167	0.259057	-0.424504	-0.937847	-0.780879	-0.0539154	0.0850736	0.0576745	0.719529	0.944466	turquoise	C1orf186
ENSG00000265972	-0.501104	0.339668	0.0120937	0.342347	-0.366519	-0.967767	-0.739882	-0.0228247	0.0239043	-0.141501	0.713617	0.982454	turquoise	TXNIP
ENSG00000266405	-0.0484522	0.494034	0.317667	0.283063	-0.303793	-0.523871	-0.289893	-0.17735	0.566026	-0.474439	0.176735	0.550578	turquoise	CBX3P2
ENSG00000266964	-0.743063	-0.183903	0.0174068	0.652253	0.269121	-0.743494	-0.305336	0.367621	0.00867432	0.151972	0.813336	0.63639	turquoise	FXYD1
ENSG00000268089	-0.0246763	0.731646	0.20541	0.0607921	-0.545477	-0.789612	-0.906421	-0.498354	-0.249275	-0.355964	0.27692	0.914653	turquoise	GABRQ
ENSG00000269855	0.0920801	0.781022	0.27391	0.0291248	-0.410311	-0.691969	-0.874516	-0.511514	-0.403721	-0.447992	0.181235	0.84429	turquoise	RNF225
ENSG00000272398	0.033126	0.729045	0.183385	0.00288726	-0.571963	-0.72953	-0.948929	-0.631857	-0.293349	-0.223683	0.187847	0.855795	turquoise	CD24
ENSG00000274070	-0.197641	0.477685	0.0455793	0.149935	-0.418592	-0.765229	-0.895903	-0.509937	-0.115949	0.113629	0.351361	0.816737	turquoise	GATSL2
ENSG00000274180	-0.527274	0.296966	0.135728	0.510898	-0.136221	-0.93902	-0.577213	0.108235	0.167287	-0.249706	0.730583	0.928245	turquoise	NATD1
ENSG00000276141	-0.525846	0.0297075	0.195574	0.638465	0.134181	-0.625398	-0.00286622	0.44625	0.669135	-0.346532	0.622797	0.539447	turquoise	WHAMMP3
ENSG00000277027	0.360269	0.701936	0.0358828	-0.451776	-0.612575	-0.292384	-0.753715	-0.554476	-0.737225	-0.373061	-0.117908	0.501932	turquoise	RMRP
ENSG00000279141	-0.397143	0.423711	-0.0157	0.205781	-0.513349	-0.934932	-0.833314	-0.173345	-0.0725665	-0.1206	0.614971	0.979543	turquoise	LINC01451
ENSG00000281379	-0.186932	0.248395	-0.280248	-0.259776	-0.75799	-0.483883	-0.479019	0.0241059	-0.160795	-0.197983	0.361182	0.561847	turquoise	SEPT14P19
ENSG00000282883	-0.629821	0.137805	-0.216156	0.279399	-0.363071	-0.93184	-0.736237	0.0677398	-0.0071396	0.148318	0.805832	0.916354	turquoise	AKR1C3
ENSG00000020577	0.304812	0.310389	0.921296	0.572276	0.606493	0.0714619	0.285573	-0.218783	0.135526	-0.62462	-0.345869	-0.0836827	salmon	SAMD4A
ENSG00000039523	0.526913	0.686181	0.872228	0.253601	0.333236	-0.0314342	-0.0756007	-0.390182	-0.318834	-0.911239	-0.392611	0.155328	salmon	FAM65A
ENSG00000043143	0.603376	0.448613	0.81115	0.271672	0.6414	0.30843	0.202688	-0.404541	-0.0497822	-0.569118	-0.599633	-0.243707	salmon	JADE2
ENSG00000048740	0.32921	0.686617	0.960855	0.546402	0.424017	-0.274133	-0.163809	-0.406051	-0.0256073	-0.817576	-0.206717	0.344629	salmon	CELF2
ENSG00000070614	0.432125	0.755694	0.941899	0.399493	0.247732	-0.234646	-0.252354	-0.565346	-0.178649	-0.796606	-0.315002	0.333658	salmon	NDST1
ENSG00000070882	0.576951	0.446172	0.874681	0.322862	0.669144	0.28195	0.255913	-0.314046	-0.092121	-0.701473	-0.55964	-0.21775	salmon	OSBPL3
ENSG00000074590	0.445107	0.34078	0.880943	0.447295	0.560955	0.232659	0.395419	-0.242371	0.316034	-0.658411	-0.496781	-0.230228	salmon	NUAK1
ENSG00000075420	0.541511	0.214808	0.737392	0.282615	0.686498	0.48746	0.543896	-0.1536	0.229817	-0.555037	-0.613461	-0.475867	salmon	FNDC3B
ENSG00000076513	0.767729	0.669165	0.853013	0.0595127	0.273748	0.290444	0.132147	-0.496983	-0.158744	-0.884074	-0.704099	-0.157972	salmon	ANKRD13A
ENSG00000078177	0.202349	0.45185	0.848792	0.574195	0.290434	-0.183449	0.107515	-0.254143	0.437196	-0.682092	-0.189639	0.177512	salmon	N4BP2
ENSG00000090857	0.0194479	0.652205	0.781453	0.629159	0.103628	-0.622036	-0.357229	-0.343617	0.273482	-0.673678	0.119102	0.651567	salmon	PDPR
ENSG00000090924	0.14862	0.494325	0.880354	0.590241	0.399794	-0.297118	0.00106308	-0.112031	-0.00538872	-0.867227	-0.0423292	0.33088	salmon	PLEKHG2
ENSG00000095951	0.384709	0.219876	0.834106	0.445187	0.772683	0.279358	0.455865	-0.0226443	-0.0245901	-0.698053	-0.403392	-0.268889	salmon	HIVEP1
ENSG00000105976	0.312383	0.695539	0.94839	0.531247	0.303258	-0.318284	-0.235555	-0.505859	-0.0220978	-0.736853	-0.211838	0.382455	salmon	MET
ENSG00000108797	0.0544581	0.327201	0.88432	0.745823	0.496752	-0.23382	0.207149	-0.0478726	0.4353	-0.706425	-0.0439221	0.193005	salmon	CNTNAP1
ENSG00000109790	0.55491	0.249285	0.778325	0.297727	0.644716	0.44688	0.429956	-0.323121	0.144136	-0.447483	-0.65033	-0.437265	salmon	KLHL5
ENSG00000112414	0.444209	0.599844	0.956586	0.465636	0.38201	-0.0476008	0.0256797	-0.481351	0.148465	-0.719206	-0.414907	0.0952413	salmon	ADGRG6
ENSG00000112893	0.367634	0.773986	0.900283	0.420578	0.155811	-0.336496	-0.349368	-0.617112	-0.0917834	-0.716152	-0.249209	0.426767	salmon	MAN2A1
ENSG00000116991	0.644943	0.431262	0.882344	0.246691	0.51755	0.379674	0.364086	-0.351772	0.0266915	-0.732493	-0.67341	-0.321735	salmon	SIPA1L2
ENSG00000124302	0.511957	0.764411	0.913798	0.335992	0.310111	-0.150548	-0.28729	-0.659271	-0.259443	-0.693374	-0.402623	0.261902	salmon	CHST8
ENSG00000125257	0.608394	0.705877	0.897439	0.235003	0.313282	0.0222713	-0.175633	-0.674721	-0.327397	-0.666805	-0.538613	0.0920454	salmon	ABCC4
ENSG00000125864	0.50775	0.504203	0.80268	0.321883	0.425029	0.16221	0.250997	-0.277815	0.332258	-0.758238	-0.475847	-0.109762	salmon	BFSP1
ENSG00000126561	0.13411	0.321789	0.760936	0.590504	0.495631	-0.101958	0.312072	0.0886482	0.491405	-0.794253	-0.0857091	0.0889815	salmon	STAT5A
ENSG00000127528	0.344164	0.456046	0.65258	0.254905	0.486531	-0.0460322	-0.158189	-0.299855	-0.556129	-0.540329	-0.232642	0.13879	salmon	KLF2
ENSG00000128591	0.489049	0.389544	0.928487	0.421097	0.566816	0.228968	0.347888	-0.275441	0.119991	-0.727289	-0.519858	-0.204546	salmon	FLNC
ENSG00000130508	0.341496	0.833187	0.872486	0.398746	0.0925066	-0.424072	-0.432352	-0.590198	-0.139368	-0.784353	-0.176582	0.533105	salmon	PXDN
ENSG00000133816	0.555289	0.467842	0.884925	0.293702	0.571943	0.228393	0.231845	-0.26827	-0.224409	-0.813385	-0.51405	-0.150388	salmon	MICAL2
ENSG00000136111	0.290118	0.448754	0.841699	0.572379	0.621533	-0.086749	-0.0137211	-0.393262	0.138683	-0.454502	-0.270434	0.0991744	salmon	TBC1D4
ENSG00000138448	-0.0022638	0.454422	0.859598	0.741874	0.366125	-0.461568	-0.147205	-0.263862	0.199377	-0.574703	0.0565365	0.444922	salmon	ITGAV
ENSG00000140443	0.109698	0.431489	0.92519	0.72616	0.48328	-0.29278	0.00938769	-0.253111	0.229639	-0.62841	-0.083978	0.276221	salmon	IGF1R
ENSG00000143473	0.453682	0.653981	0.909409	0.441433	0.409848	-0.0717503	-0.00367986	-0.42886	0.210379	-0.772776	-0.375515	0.137847	salmon	KCNH1
ENSG00000144724	0.358666	0.78136	0.924437	0.461171	0.197263	-0.330585	-0.238679	-0.481173	0.0745611	-0.865262	-0.218472	0.418608	salmon	PTPRG
ENSG00000146350	-0.0361292	0.294451	0.771037	0.719937	0.600271	-0.355971	-0.125375	-0.182402	-0.109828	-0.395419	0.0759957	0.332923	salmon	TBC1D32
ENSG00000154548	0.201749	0.460351	0.623776	0.384231	0.244668	-0.254457	-0.371817	-0.616724	-0.165627	-0.154198	-0.18075	0.284594	salmon	SRSF12
ENSG00000158014	0.363672	0.192681	0.809619	0.449279	0.613203	0.295617	0.575758	0.00254524	0.355229	-0.709432	-0.424178	-0.313867	salmon	SLC30A2
ENSG00000159251	0.419814	0.571772	0.940408	0.488397	0.597915	-0.0415089	0.0248931	-0.340404	-0.0674478	-0.770148	-0.338722	0.105721	salmon	ACTC1
ENSG00000160703	0.206532	0.702896	0.714052	0.402426	0.244652	-0.467067	-0.520074	-0.477197	-0.36448	-0.585576	-0.0197543	0.568653	salmon	NLRX1
ENSG00000160951	0.282695	0.626748	0.851423	0.498661	0.423129	-0.298789	-0.32431	-0.521843	-0.237503	-0.546358	-0.179034	0.365728	salmon	PTGER1
ENSG00000162669	0.277881	0.503438	0.872319	0.552232	0.42595	-0.12041	0.166449	-0.161384	0.40655	-0.833294	-0.215176	0.141992	salmon	HFM1
ENSG00000163053	0.285437	0.117583	0.815034	0.537827	0.678821	0.248529	0.490108	-0.105815	0.280479	-0.477289	-0.395024	-0.297921	salmon	SLC16A14
ENSG00000163430	0.325554	0.621643	0.98094	0.583953	0.439191	-0.204809	-0.0202632	-0.356463	0.16834	-0.820042	-0.245508	0.248911	salmon	FSTL1
ENSG00000164031	0.205784	0.793304	0.771097	0.446682	-0.0243533	-0.537355	-0.440025	-0.518148	0.174704	-0.71409	-0.0446758	0.616473	salmon	DNAJB14
ENSG00000164236	0.431054	0.209344	0.779304	0.341408	0.511273	0.354958	0.567104	-0.0559202	0.279316	-0.705545	-0.498827	-0.357415	salmon	ANKRD33B
ENSG00000167601	0.506232	0.363367	0.920683	0.408548	0.619588	0.274787	0.368426	-0.271448	0.0706844	-0.697745	-0.544096	-0.250193	salmon	AXL
ENSG00000168264	0.149671	0.306077	0.599839	0.390628	0.578765	-0.125604	-0.0736026	-0.0835446	-0.43659	-0.498885	-0.0479091	0.174126	salmon	IRF2BP2
ENSG00000168615	0.502712	0.584331	0.84153	0.271058	0.14975	0.03229	0.0303828	-0.519541	0.092378	-0.689494	-0.489193	0.0318575	salmon	ADAM9
ENSG00000169067	0.129863	0.547807	0.849228	0.604658	0.240159	-0.359801	-0.0114894	-0.17203	0.372829	-0.838451	-0.035851	0.378016	salmon	ACTBL2
ENSG00000170558	0.018197	0.584687	0.742428	0.57393	0.0205417	-0.565461	-0.308655	-0.347917	0.249554	-0.618307	0.0830747	0.584598	salmon	CDH2
ENSG00000170989	0.300128	0.354222	0.913956	0.59219	0.560438	0.0289515	0.253032	-0.265424	0.310632	-0.601402	-0.339467	-0.0457186	salmon	S1PR1
ENSG00000171444	0.43538	0.529631	0.876443	0.374338	0.539721	0.0163115	0.0594206	-0.255057	-0.268124	-0.827732	-0.340537	0.0663568	salmon	MCC
ENSG00000173391	0.120697	0.323082	0.846751	0.653425	0.44528	-0.178758	0.0853617	-0.264266	0.24143	-0.489481	-0.149835	0.14482	salmon	OLR1
ENSG00000173705	0.250997	0.377681	0.74446	0.425779	0.191971	-0.0741886	0.0731526	-0.371822	0.264719	-0.479551	-0.287554	0.0699194	salmon	SUSD5
ENSG00000173706	0.178598	0.676831	0.728471	0.419801	-0.0780478	-0.468298	-0.371079	-0.525632	0.167755	-0.590916	-0.0790982	0.521459	salmon	HEG1
ENSG00000175066	0.153899	0.216129	0.598897	0.470579	0.678425	0.0208378	0.270129	0.127902	0.176518	-0.59409	-0.0926721	-0.0164198	salmon	GK5
ENSG00000176928	0.307607	0.0816857	0.819623	0.53126	0.793138	0.321215	0.578234	-0.00344862	0.218658	-0.543134	-0.405909	-0.365079	salmon	GCNT4
ENSG00000179242	0.417632	0.39292	0.795905	0.330392	0.385592	0.164146	0.389591	-0.0596629	0.23841	-0.896847	-0.388991	-0.124595	salmon	CDH4
ENSG00000182218	0.225195	0.692224	0.928133	0.593573	0.350573	-0.40707	-0.235246	-0.366883	0.0295274	-0.815465	-0.0830334	0.469263	salmon	HHIPL1
ENSG00000183780	0.491068	0.773616	0.928997	0.346921	0.253073	-0.184864	-0.280057	-0.637787	-0.234189	-0.74654	-0.378782	0.294461	salmon	SLC35F3
ENSG00000184545	0.138732	0.368721	0.874121	0.664824	0.661461	-0.168377	0.168478	0.00646669	0.0993099	-0.793864	-0.0635707	0.174066	salmon	DUSP8
ENSG00000185834	0.496573	0.652519	0.735869	0.136479	0.234429	-0.0677505	-0.278411	-0.522636	-0.622808	-0.669634	-0.367573	0.203839	salmon	RPL12P4
ENSG00000197321	0.119762	0.546425	0.884695	0.671985	0.51031	-0.402396	-0.221206	-0.307229	-0.0664714	-0.637048	-0.0100251	0.432862	salmon	SVIL
ENSG00000197582	0.544026	0.50998	0.452467	-0.161887	0.142458	0.140736	-0.183488	-0.370997	-0.79043	-0.57786	-0.410623	0.019746	salmon	GPX1P1
ENSG00000203724	0.215359	0.239315	0.917269	0.68056	0.777835	0.0522771	0.380696	-0.0323914	0.236103	-0.66859	-0.240166	-0.0839808	salmon	C1orf53
ENSG00000251322	0.61014	0.741729	0.735117	0.0594079	0.235477	-0.00742656	-0.296784	-0.587977	-0.597681	-0.712901	-0.457262	0.171317	salmon	SHANK3
ENSG00000255019	0.46349	0.562028	0.71918	0.229546	0.470651	-0.00900959	-0.212712	-0.479569	-0.51342	-0.526663	-0.359316	0.117351	salmon	OR5D15P
ENSG00000255874	0.427721	0.505139	0.714813	0.220184	0.203529	0.0657461	0.231708	-0.101975	0.178745	-0.945501	-0.338947	0.0104181	salmon	LINC00346
ENSG00000266274	0.271353	0.618667	0.836608	0.493295	0.162003	-0.282567	-0.156482	-0.493466	0.298306	-0.61476	-0.219425	0.315777	salmon	RN7SL138P
ENSG00000267151	0.253015	0.185962	0.707744	0.378745	0.553887	0.10732	0.183197	-0.148454	-0.350125	-0.470324	-0.274879	-0.0957312	salmon	MIR2117HG
ENSG00000005001	-0.156317	-0.54325	0.209706	0.421835	0.627702	0.403145	0.936273	0.632032	0.627917	-0.127918	-0.0388817	-0.563082	red	PRSS22
ENSG00000005884	0.146957	-0.290208	0.473453	0.351777	0.747365	0.505766	0.83982	0.38902	0.170731	-0.380348	-0.291577	-0.5865	red	ITGA3
ENSG00000006652	0.242388	-0.51954	-0.218533	-0.303602	0.247953	0.857329	0.864175	0.367015	0.293292	0.147139	-0.447776	-0.91772	red	IFRD1
ENSG00000012171	-0.160532	-0.607074	0.246663	0.478663	0.846443	0.431906	0.845342	0.525287	0.303455	0.0734615	-0.0618175	-0.598655	red	SEMA3B
ENSG00000023445	-0.285519	-0.626593	0.234037	0.579098	0.833512	0.317288	0.888718	0.683181	0.517379	-0.0138476	0.0862161	-0.504062	red	BIRC3
ENSG00000026025	-0.156173	-0.563337	0.254278	0.511128	0.778931	0.408543	0.872272	0.493994	0.612377	0.0645242	-0.0759167	-0.587757	red	VIM
ENSG00000026508	-0.0303827	-0.630261	0.0919231	0.221898	0.73709	0.633532	0.968187	0.618628	0.276889	0.00410058	-0.176044	-0.764933	red	CD44
ENSG00000038382	0.0843178	-0.287122	0.436957	0.372867	0.669705	0.440935	0.866091	0.476551	0.357354	-0.440326	-0.213317	-0.529979	red	TRIO
ENSG00000049249	-0.176761	-0.350891	0.516265	0.73776	0.861658	0.174134	0.742317	0.438473	0.616361	-0.200595	0.0130781	-0.33796	red	TNFRSF9
ENSG00000053747	0.185895	-0.463856	0.074908	-0.0592049	0.422727	0.720772	0.880772	0.434455	0.0677024	-0.129688	-0.366531	-0.785451	red	LAMA3
ENSG00000055483	0.115759	-0.457489	0.100199	0.070068	0.564705	0.654443	0.931935	0.569509	0.278369	-0.209205	-0.263986	-0.732351	red	USP36
ENSG00000058085	0.239658	-0.200734	0.528934	0.301138	0.679132	0.518718	0.769435	0.24353	0.0822227	-0.400509	-0.384058	-0.578439	red	LAMC2
ENSG00000067082	-0.0471649	-0.502597	0.281657	0.407529	0.696261	0.490104	0.941378	0.51274	0.574114	-0.108755	-0.166855	-0.640652	red	KLF6
ENSG00000068028	-0.218353	-0.838399	-0.358026	0.0227369	0.449307	0.60827	0.877456	0.668489	0.489499	0.458009	-0.0270576	-0.774156	red	RASSF1
ENSG00000070190	0.0432241	-0.348376	0.267478	0.273427	0.540941	0.463938	0.895767	0.546594	0.525321	-0.356242	-0.176758	-0.560099	red	DAPP1
ENSG00000070404	0.232602	-0.503398	0.113116	-0.0114093	0.609403	0.814458	0.918045	0.371272	0.0682463	-0.0105141	-0.447331	-0.891999	red	FSTL3
ENSG00000076706	-0.132531	-0.457898	0.34865	0.569515	0.800096	0.345855	0.866097	0.515434	0.678908	-0.113455	-0.0577259	-0.510069	red	MCAM
ENSG00000077238	-0.0204879	-0.576463	0.14246	0.223429	0.694495	0.587309	0.929316	0.606778	0.18227	-0.090195	-0.165271	-0.704801	red	IL4R
ENSG00000078098	-0.413597	-0.810838	-0.0675323	0.419633	0.649326	0.345349	0.912756	0.823731	0.572111	0.199948	0.192174	-0.551875	red	FAP
ENSG00000081041	-0.238072	-0.724882	-0.117939	0.161554	0.478176	0.472616	0.903954	0.787726	0.308142	0.0523867	0.0538283	-0.617967	red	CXCL2
ENSG00000088826	-0.0207336	-0.691134	-0.2763	-0.0970604	0.412146	0.714603	0.91091	0.61138	0.413273	0.235511	-0.186787	-0.830087	red	SMOX
ENSG00000089048	0.0571145	-0.694426	-0.395346	-0.317879	0.179311	0.794027	0.847893	0.501766	0.232145	0.322834	-0.281564	-0.884811	red	ESF1
ENSG00000092969	0.264317	-0.118547	0.608818	0.386233	0.644773	0.464866	0.709267	0.0636621	0.331633	-0.327425	-0.437775	-0.540749	red	TGFB2
ENSG00000095752	0.0998991	-0.408299	0.0954922	0.0464781	0.359079	0.584776	0.900252	0.524876	0.409629	-0.251196	-0.251977	-0.66415	red	IL11
ENSG00000100418	0.298926	-0.389305	0.150205	-0.0317319	0.693591	0.783588	0.805794	0.327252	-0.113193	-0.0887028	-0.452409	-0.82223	red	DESI1
ENSG00000101187	-0.221971	-0.720334	0.019009	0.351121	0.843598	0.469551	0.802866	0.613119	0.186949	0.258999	0.0117628	-0.632468	red	SLCO4A1
ENSG00000101255	-0.316587	-0.671327	-0.127943	0.316348	0.461693	0.3343	0.804523	0.634514	0.830833	0.261711	0.104025	-0.521588	red	TRIB3
ENSG00000102007	0.23557	-0.556537	-0.0844441	-0.207367	0.440701	0.865075	0.868971	0.376117	-0.0376174	0.109863	-0.44802	-0.926768	red	PLP2
ENSG00000102172	0.0381355	-0.730916	-0.312785	-0.185612	0.495922	0.798972	0.820473	0.502847	0.0358252	0.395956	-0.258915	-0.896911	red	SMS
ENSG00000102359	-0.378369	-0.812616	-0.077856	0.396271	0.687531	0.391755	0.92225	0.805608	0.562229	0.227196	0.153967	-0.594251	red	SRPX2
ENSG00000103257	0.366583	-0.381559	0.150404	-0.0940667	0.536881	0.867689	0.917983	0.290697	0.133929	-0.125156	-0.560099	-0.914873	red	SLC7A5
ENSG00000104140	-0.196972	-0.803027	-0.461373	-0.100259	0.252665	0.595543	0.795854	0.58868	0.52774	0.524399	-0.0455469	-0.748264	red	RHOV
ENSG00000104497	0.227328	0.0714893	0.699205	0.497898	0.685338	0.264948	0.643818	0.199785	0.469568	-0.657222	-0.28128	-0.308948	red	SNX16
ENSG00000104689	-0.0936686	-0.776721	-0.384775	-0.158538	0.296823	0.700614	0.898847	0.654818	0.352728	0.324046	-0.130104	-0.826119	red	TNFRSF10A
ENSG00000104691	0.0451367	-0.718685	-0.456103	-0.347886	0.172278	0.800756	0.815583	0.482805	0.224003	0.413518	-0.274546	-0.893362	red	UBXN8
ENSG00000104907	0.148021	-0.610418	-0.0716112	-0.0713156	0.592251	0.827592	0.935165	0.484984	0.152143	0.12612	-0.36208	-0.918026	red	TRMT1
ENSG00000105825	0.119253	-0.390209	0.383873	0.339021	0.719851	0.577833	0.929095	0.397181	0.414521	-0.222998	-0.318267	-0.691192	red	TFPI2
ENSG00000107105	0.340116	0.235159	0.333582	-0.00372577	-0.1409	0.21482	0.300803	-0.170951	0.531263	-0.421192	-0.389992	-0.200506	red	ELAVL2
ENSG00000109321	-0.26136	-0.704436	-0.261657	0.0677252	0.35535	0.43918	0.85966	0.834228	0.43839	0.072179	0.110904	-0.572541	red	AREG
ENSG00000112769	0.0117759	-0.465231	0.271028	0.36772	0.819733	0.534134	0.92489	0.546624	0.445782	-0.158274	-0.182558	-0.657162	red	LAMA4
ENSG00000113070	-0.377016	-0.617446	0.0391568	0.462475	0.516608	0.214215	0.853622	0.780328	0.775177	-0.0338051	0.209022	-0.398514	red	HBEGF
ENSG00000113369	0.357418	-0.238395	0.310789	0.0455929	0.508856	0.726686	0.896148	0.273357	0.337132	-0.333129	-0.518183	-0.772565	red	ARRDC3
ENSG00000113430	-0.07055	-0.373289	0.172947	0.279693	0.5327	0.353517	0.821525	0.664246	0.460796	-0.351395	-0.0176248	-0.446264	red	IRX4
ENSG00000115221	-0.145043	-0.46887	0.415349	0.628825	0.894167	0.320242	0.79672	0.443432	0.4674	-0.0498181	-0.056858	-0.487352	red	ITGB6
ENSG00000115590	-0.307858	-0.752938	-0.115554	0.264055	0.683663	0.413495	0.836518	0.819158	0.216345	0.137885	0.143868	-0.56619	red	IL1R2
ENSG00000115963	-0.0504765	-0.385108	0.295857	0.405614	0.517252	0.372218	0.843457	0.43179	0.727682	-0.170553	-0.140093	-0.513131	red	RND3
ENSG00000116717	-0.0338412	-0.346841	0.219755	0.304654	0.463824	0.372012	0.849835	0.557949	0.672916	-0.314835	-0.0949072	-0.480809	red	GADD45A
ENSG00000117318	0.141864	-0.507898	-0.285645	-0.354486	0.243649	0.707006	0.685373	0.496912	-0.218293	0.0526519	-0.254216	-0.726617	red	ID3
ENSG00000117525	0.250849	-0.446554	0.143833	-0.0225615	0.476105	0.777629	0.894189	0.303538	0.153303	-0.0523968	-0.471648	-0.853316	red	F3
ENSG00000118503	-0.0540302	-0.411511	-0.0375077	0.00595111	0.274988	0.391587	0.71488	0.656534	0.119281	-0.273351	-0.0159933	-0.447446	red	TNFAIP3
ENSG00000121578	-0.225882	-0.768226	-0.0997585	0.231068	0.688328	0.534291	0.936154	0.772809	0.345078	0.162431	0.0227718	-0.69422	red	B4GALT4
ENSG00000121769	-0.126954	-0.786383	-0.256138	0.0526973	0.59817	0.657757	0.835405	0.547002	0.335757	0.478294	-0.121899	-0.810689	red	FABP3
ENSG00000121895	0.0124788	-0.342675	0.412882	0.509721	0.853187	0.411355	0.829889	0.418148	0.574755	-0.195904	-0.173823	-0.53873	red	TMEM156
ENSG00000122641	-0.219702	-0.486412	0.381812	0.648593	0.847249	0.262927	0.853467	0.601412	0.575265	-0.165548	0.0451527	-0.434381	red	INHBA
ENSG00000122862	-0.161633	-0.569129	0.220074	0.456056	0.723774	0.422334	0.94884	0.640665	0.607385	-0.089829	-0.0390665	-0.588232	red	SRGN
ENSG00000122863	0.276941	0.018982	0.73226	0.477424	0.660404	0.353633	0.65771	0.0501355	0.400415	-0.509589	-0.402597	-0.414197	red	CHST3
ENSG00000123136	-0.0453056	-0.763071	-0.267823	-0.0674395	0.493365	0.745328	0.932415	0.619112	0.306763	0.308621	-0.187483	-0.874023	red	DDX39A
ENSG00000123146	-0.109837	-0.650083	-0.0503055	0.149762	0.414998	0.558107	0.938306	0.589415	0.584438	0.104818	-0.124618	-0.710668	red	ADGRE5
ENSG00000123685	-0.213516	-0.779801	-0.0864264	0.23658	0.751795	0.540068	0.848031	0.660985	0.161371	0.293393	-0.00673312	-0.699415	red	BATF3
ENSG00000123843	0.123097	-0.219764	0.471046	0.42781	0.604328	0.409285	0.753242	0.184014	0.639192	-0.206636	-0.311221	-0.522328	red	C4BPB
ENSG00000123977	0.152954	-0.361748	0.414191	0.38065	0.878457	0.587406	0.862209	0.318186	0.347268	-0.140159	-0.344783	-0.695349	red	DAW1
ENSG00000124134	0.322934	-0.0282939	0.681218	0.408254	0.707418	0.464987	0.74045	0.105379	0.383033	-0.501682	-0.45412	-0.52049	red	KCNS1
ENSG00000124882	0.043848	-0.359418	0.333459	0.382276	0.696207	0.474589	0.90225	0.482257	0.614381	-0.263361	-0.204205	-0.591162	red	EREG
ENSG00000125351	0.0625889	-0.689958	-0.437759	-0.370347	0.155703	0.795991	0.821147	0.520468	0.149999	0.31469	-0.269037	-0.873898	red	UPF3B
ENSG00000125398	0.384231	-0.198506	0.342564	0.0154349	0.471156	0.712072	0.85779	0.252407	0.188948	-0.401393	-0.528467	-0.740546	red	SOX9
ENSG00000128342	0.164547	-0.439796	0.0683285	-0.0495281	0.327671	0.676884	0.883369	0.432836	0.226349	-0.154999	-0.346388	-0.748093	red	LIF
ENSG00000129451	-0.156565	-0.342372	0.317366	0.539534	0.575011	0.209568	0.763842	0.477684	0.853882	-0.192963	0.00390271	-0.360406	red	KLK10
ENSG00000131015	-0.309866	-0.571774	0.171231	0.572598	0.656278	0.217626	0.706055	0.442028	0.716569	0.229799	0.0776476	-0.419416	red	ULBP2
ENSG00000131711	0.22624	-0.15165	0.567331	0.417153	0.687503	0.470672	0.782393	0.164022	0.52553	-0.337123	-0.394807	-0.559599	red	MAP1B
ENSG00000131941	0.145525	-0.593298	-0.202492	-0.242776	0.364044	0.804983	0.872841	0.524412	0.0254075	0.0798657	-0.324983	-0.866498	red	RHPN2
ENSG00000132481	-0.113064	-0.766441	-0.111289	0.134681	0.650308	0.6642	0.964534	0.652751	0.342817	0.240689	-0.127635	-0.817954	red	TRIM47
ENSG00000133398	0.080561	-0.610744	-0.21654	-0.148841	0.341913	0.758383	0.918357	0.528611	0.416458	0.148781	-0.287784	-0.855467	red	MED10
ENSG00000134531	0.174668	-0.397823	0.325469	0.26407	0.723497	0.657283	0.942398	0.368257	0.436254	-0.160829	-0.380051	-0.763442	red	EMP1
ENSG00000134668	-0.0447955	-0.703792	-0.279752	-0.129262	0.441729	0.685082	0.856701	0.676891	0.0741347	0.171499	-0.127302	-0.778969	red	SPOCD1
ENSG00000135046	0.231887	-0.531764	-0.112807	-0.207194	0.348251	0.855068	0.922436	0.398115	0.268318	0.0772517	-0.447488	-0.926549	red	ANXA1
ENSG00000135069	0.268295	-0.0896258	0.217069	0.0720047	0.207033	0.439768	0.472817	-0.136545	0.581408	0.043943	-0.443861	-0.499224	red	PSAT1
ENSG00000135480	0.0972603	-0.655778	-0.0693649	-0.0237282	0.609653	0.805868	0.943884	0.49689	0.171588	0.176624	-0.329916	-0.913585	red	KRT7
ENSG00000136068	-0.130716	-0.646253	0.0972474	0.319295	0.65568	0.532287	0.982203	0.641124	0.544936	0.0216789	-0.0950649	-0.695565	red	FLNB
ENSG00000136114	-0.30124	-0.60961	0.0257266	0.372757	0.408679	0.287793	0.848728	0.661323	0.757649	0.0305547	0.099196	-0.467527	red	THSD1
ENSG00000136244	0.19346	-0.304778	0.301212	0.184368	0.466744	0.588658	0.879875	0.308021	0.538196	-0.239865	-0.38267	-0.679088	red	IL6
ENSG00000137673	-0.331791	-0.860907	-0.266072	0.125209	0.472709	0.464117	0.787779	0.708057	0.1446	0.394505	0.101398	-0.632809	red	MMP7
ENSG00000137868	-0.395818	-0.877291	-0.183302	0.291661	0.647017	0.411706	0.830015	0.769234	0.269703	0.374308	0.165269	-0.604248	red	STRA6
ENSG00000138347	0.184222	-0.470198	0.0389758	-0.0379276	0.498011	0.748123	0.946183	0.507881	0.276444	-0.137239	-0.35368	-0.818946	red	MYPN
ENSG00000138623	0.101552	-0.308483	0.473659	0.445417	0.709269	0.462877	0.804552	0.235929	0.492626	-0.16209	-0.309722	-0.586094	red	SEMA7A
ENSG00000139344	-0.104341	-0.690388	-0.18966	-0.00460492	0.578764	0.574083	0.712282	0.59296	-0.169447	0.247278	-0.0617365	-0.672228	red	AMDHD1
ENSG00000140859	0.100302	-0.561942	-0.116949	-0.086962	0.574513	0.726285	0.840787	0.556166	0.0506177	0.0524864	-0.251495	-0.794453	red	KIFC3
ENSG00000141391	-0.263713	-0.618683	-0.243018	0.0487086	0.173178	0.348769	0.79142	0.777974	0.503659	-0.00503015	0.128413	-0.472518	red	PRELID3A
ENSG00000142227	-0.210221	-0.815298	-0.181781	0.156158	0.695121	0.582623	0.859541	0.679875	0.18712	0.353669	-0.0145105	-0.740174	red	EMP3
ENSG00000142623	-0.11149	-0.730587	-0.186376	0.016841	0.559046	0.627034	0.878845	0.708389	0.0919672	0.157475	-0.0722397	-0.743738	red	PADI1
ENSG00000142627	0.0519532	-0.356638	0.160934	0.147322	0.345597	0.477939	0.864279	0.510207	0.539812	-0.299098	-0.194817	-0.567355	red	EPHA2
ENSG00000143367	-0.090955	-0.336526	0.15497	0.336067	0.413124	0.290236	0.746616	0.467075	0.852976	-0.146975	-0.0488137	-0.415595	red	TUFT1
ENSG00000144136	-0.00833296	-0.459648	0.314226	0.381157	0.696402	0.497826	0.947111	0.539021	0.48356	-0.221595	-0.179566	-0.629086	red	SLC20A1
ENSG00000144554	-0.172001	-0.714885	-0.266032	0.0583031	0.612337	0.498847	0.538235	0.395635	-0.0473643	0.604471	-0.0340616	-0.626436	red	FANCD2
ENSG00000146410	0.212853	-0.41665	0.0432634	-0.0106892	0.40642	0.721269	0.852494	0.265662	0.545873	0.0672184	-0.432943	-0.812714	red	MTFR2
ENSG00000147408	0.234869	-0.264474	0.477824	0.361084	0.895977	0.588678	0.802459	0.235421	0.254702	-0.208013	-0.401764	-0.671044	red	CSGALNACT1
ENSG00000147684	0.0704694	-0.735574	-0.423168	-0.331558	0.299185	0.839088	0.798058	0.453068	0.054613	0.457497	-0.303571	-0.927516	red	NDUFB9
ENSG00000147697	0.0198634	-0.573994	-0.492134	-0.371598	0.12699	0.644634	0.675998	0.564126	0.184518	0.231517	-0.139172	-0.694062	red	GSDMC
ENSG00000148344	-0.00335562	-0.703953	-0.363785	-0.210552	0.30299	0.743762	0.883753	0.602431	0.331419	0.270723	-0.201454	-0.846286	red	PTGES
ENSG00000148677	0.0225091	-0.199015	0.494377	0.545128	0.626073	0.266084	0.676115	0.194353	0.724226	-0.191866	-0.19414	-0.393645	red	ANKRD1
ENSG00000152137	0.0607753	-0.516083	0.209661	0.298629	0.794838	0.630054	0.905973	0.403919	0.450577	0.0604515	-0.287293	-0.764022	red	HSPB8
ENSG00000153292	0.168386	-0.350053	0.402081	0.337212	0.762165	0.601945	0.91569	0.345387	0.452519	-0.213351	-0.363342	-0.708504	red	ADGRF1
ENSG00000153294	-0.177625	-0.756918	-0.173437	0.0766674	0.458049	0.577376	0.939541	0.742605	0.321516	0.137616	-0.0330571	-0.721525	red	ADGRF4
ENSG00000155918	-0.120187	-0.490423	-0.0483065	0.193091	0.330126	0.399532	0.779379	0.486912	0.828222	0.0896204	-0.0664801	-0.540095	red	RAET1L
ENSG00000157613	-0.121486	-0.593999	-0.0390107	0.0900646	0.353737	0.477458	0.843948	0.654339	0.224515	-0.0631969	-0.0479497	-0.590908	red	CREB3L1
ENSG00000158125	-0.0284482	-0.523084	0.106464	0.235749	0.612496	0.549747	0.957531	0.627835	0.546008	-0.127532	-0.145234	-0.674	red	XDH
ENSG00000159640	-0.0725535	-0.429832	0.186736	0.271965	0.463232	0.395654	0.875717	0.630454	0.471303	-0.304727	-0.0643831	-0.506273	red	ACE
ENSG00000160072	-0.145833	-0.654681	-0.122659	0.0516834	0.409652	0.51118	0.854824	0.72581	0.156987	-0.00522335	-0.0153251	-0.62337	red	ATAD3B
ENSG00000162078	-0.0152686	-0.277819	0.382634	0.39962	0.491012	0.312841	0.815985	0.481978	0.575298	-0.414916	-0.114907	-0.41953	red	ZG16B
ENSG00000162614	-0.0779373	-0.634546	0.060702	0.298832	0.789859	0.579152	0.890125	0.522392	0.466705	0.196999	-0.149094	-0.734096	red	NEXN
ENSG00000163207	-0.219785	-0.568764	0.0950569	0.395312	0.505825	0.349789	0.870195	0.587208	0.793763	0.0297209	0.0084289	-0.52561	red	IVL
ENSG00000164442	0.153532	-0.215138	0.479054	0.405827	0.607598	0.427903	0.69942	0.090443	0.529407	-0.130135	-0.356234	-0.537114	red	CITED2
ENSG00000165271	0.13684	-0.66243	-0.155229	-0.138107	0.526747	0.853053	0.895535	0.432228	0.0936489	0.269181	-0.376072	-0.948504	red	NOL6
ENSG00000165905	-0.165941	-0.613089	-0.00389168	0.18288	0.426961	0.45178	0.895692	0.709425	0.365557	-0.0819407	-0.00849173	-0.583727	red	GYLTL1B
ENSG00000165912	0.0934351	-0.62803	-0.147658	-0.0448322	0.62997	0.765443	0.785647	0.364714	0.160057	0.377215	-0.320313	-0.868776	red	PACSIN3
ENSG00000166401	-0.0209491	-0.583612	-0.380035	-0.317615	-0.0464977	0.585662	0.718362	0.537931	0.178284	0.134457	-0.140545	-0.654788	red	SERPINB8
ENSG00000167460	0.281161	-0.455551	0.150451	0.0175646	0.693426	0.834023	0.912448	0.323509	0.146789	-0.00799022	-0.489604	-0.907438	red	TPM4
ENSG00000168374	0.128498	-0.467517	0.22917	0.257513	0.776184	0.662774	0.884846	0.333006	0.424094	0.0488742	-0.35296	-0.782986	red	ARF4
ENSG00000168528	0.0452901	-0.625459	0.0731598	0.155793	0.759346	0.711398	0.931593	0.508209	0.183085	0.107982	-0.269025	-0.833135	red	SERINC2
ENSG00000168685	0.207994	-0.270081	0.488952	0.372797	0.746778	0.562914	0.852275	0.231601	0.441801	-0.237745	-0.40288	-0.663033	red	IL7R
ENSG00000169908	-0.249919	-0.820181	-0.180681	0.173615	0.561905	0.554503	0.959706	0.769358	0.439738	0.241097	0.0178579	-0.727254	red	TM4SF1
ENSG00000171206	0.425816	-0.191239	0.364077	0.0136782	0.601255	0.753131	0.838846	0.239728	0.0378506	-0.391336	-0.556595	-0.768577	red	TRIM8
ENSG00000173334	0.192055	-0.452388	-0.103011	-0.247948	0.315343	0.710937	0.742164	0.449957	-0.19806	-0.0761095	-0.319133	-0.735315	red	TRIB1
ENSG00000173530	-0.220105	-0.624	0.0503227	0.334065	0.474766	0.398816	0.903129	0.6258	0.686473	0.0442229	-0.00135284	-0.572877	red	TNFRSF10D
ENSG00000175592	0.290587	-0.379379	0.0971635	-0.0933963	0.516691	0.782264	0.891259	0.423003	0.0988315	-0.210349	-0.43501	-0.820125	red	FOSL1
ENSG00000176092	-0.13012	-0.586861	-0.00380013	0.196134	0.507794	0.48732	0.936448	0.732467	0.506525	-0.105325	-0.0311551	-0.616486	red	AIM1L
ENSG00000178773	-0.173875	-0.674194	-5.65539e-05	0.289351	0.588843	0.511048	0.955926	0.644336	0.662355	0.119973	-0.0570286	-0.683356	red	CPNE7
ENSG00000178921	0.183725	-0.264869	0.450498	0.289815	0.776176	0.504254	0.696892	0.276612	-0.124616	-0.279934	-0.314963	-0.561877	red	PFAS
ENSG00000179776	0.0996502	-0.438846	0.302983	0.266016	0.809473	0.575207	0.777079	0.366414	-0.0502331	-0.0768745	-0.276781	-0.666351	red	CDH5
ENSG00000180209	0.0443039	-0.147151	0.0413981	0.0384275	0.0674128	0.270093	0.590444	0.406432	0.654049	-0.335999	-0.0939966	-0.314394	red	MYLPF
ENSG00000181222	0.10859	-0.263181	0.123876	0.0733327	0.298991	0.4641	0.794342	0.480922	0.546743	-0.350354	-0.206698	-0.523811	red	POLR2A
ENSG00000183696	0.055879	-0.583798	0.00538055	0.089971	0.606458	0.704956	0.97513	0.561448	0.435182	0.0253501	-0.261278	-0.820735	red	UPP1
ENSG00000185022	-0.209633	-0.630813	-0.228347	0.0590575	0.317241	0.435496	0.84665	0.77994	0.530497	0.0201503	0.0687348	-0.559009	red	MAFF
ENSG00000185163	-0.268271	-0.806436	-0.374735	-0.0463165	0.289153	0.511678	0.838599	0.801293	0.246317	0.242353	0.0822743	-0.647903	red	DDX51
ENSG00000185215	0.019395	-0.588074	0.0457298	0.143637	0.528109	0.656464	0.970818	0.508272	0.534566	0.0524129	-0.25568	-0.792124	red	TNFAIP2
ENSG00000185650	0.217481	-0.223417	0.515319	0.358526	0.707648	0.536555	0.870529	0.301498	0.414671	-0.394763	-0.377784	-0.620087	red	ZFP36L1
ENSG00000186832	-0.123861	-0.711799	-0.15579	0.146792	0.565564	0.593298	0.837841	0.487464	0.550462	0.411638	-0.131755	-0.75726	red	KRT16
ENSG00000187840	-0.299645	-0.823426	-0.442142	0.0155597	0.279801	0.485685	0.746936	0.589633	0.604378	0.586781	0.0498021	-0.662503	red	EIF4EBP1
ENSG00000196352	0.197585	-0.225296	0.363936	0.272557	0.540509	0.520997	0.817105	0.244909	0.653333	-0.244467	-0.368971	-0.611459	red	CD55
ENSG00000196639	-0.0260202	-0.690853	-0.102271	0.0578254	0.519324	0.702399	0.981652	0.589092	0.456426	0.167876	-0.21395	-0.840978	red	HRH1
ENSG00000196754	0.128586	-0.670417	-0.265437	-0.217575	0.456408	0.857402	0.868577	0.451695	0.141299	0.321539	-0.354676	-0.945906	red	S100A2
ENSG00000196878	-0.420509	-0.773408	0.00760565	0.47219	0.734449	0.290356	0.848227	0.817084	0.372238	0.140304	0.225764	-0.484396	red	LAMB3
ENSG00000197457	-0.0331512	-0.659902	-0.132934	0.0426661	0.49342	0.671786	0.960069	0.616078	0.510406	0.135335	-0.182066	-0.802285	red	STMN3
ENSG00000197989	-0.331597	-0.872588	-0.387403	0.0157771	0.308727	0.494952	0.851938	0.791323	0.340356	0.357333	0.109642	-0.659849	red	SNHG12
ENSG00000198171	-0.144499	-0.840144	-0.472623	-0.199274	0.269639	0.66254	0.708593	0.487661	0.0777866	0.627499	-0.112789	-0.794942	red	DDRGK1
ENSG00000198369	-0.125825	-0.235285	0.195507	0.342617	0.231326	0.142574	0.649091	0.446905	0.840593	-0.284667	0.0224672	-0.253028	red	SPRED2
ENSG00000198467	-0.0915741	-0.770663	-0.187904	0.0645925	0.65012	0.690609	0.902218	0.60631	0.270618	0.34261	-0.144004	-0.833853	red	TPM2
ENSG00000198604	0.130116	-0.65801	-0.26521	-0.24972	0.287037	0.839761	0.864851	0.392043	0.217393	0.322188	-0.38078	-0.934334	red	BAZ1A
ENSG00000204446	0.347715	0.133216	0.436786	0.0184536	0.0514947	0.317514	0.459653	0.0274649	0.11571	-0.613856	-0.391345	-0.294503	red	C9orf170
ENSG00000204539	0.0835063	-0.578994	-0.239802	-0.219138	0.336825	0.72625	0.852028	0.600687	0.11626	0.0365539	-0.232638	-0.788087	red	CDSN
ENSG00000205542	0.071366	-0.619703	-0.171039	-0.0366984	0.540862	0.729942	0.760849	0.309267	0.318229	0.441215	-0.316263	-0.845991	red	TMSB4X
ENSG00000211448	0.2629	-0.494407	0.107201	-0.0252733	0.610193	0.846348	0.932029	0.34177	0.139011	0.0121678	-0.48562	-0.924438	red	DIO2
ENSG00000213339	-0.0611293	-0.759757	-0.383463	-0.189785	0.415478	0.715112	0.825095	0.649923	0.06054	0.324023	-0.128306	-0.814551	red	QTRT1
ENSG00000213468	0.0872433	-0.691154	-0.201039	-0.144945	0.528344	0.808844	0.816074	0.422247	-0.0434865	0.35289	-0.321505	-0.904143	red	FIRRE
ENSG00000214049	-0.031253	-0.711143	-0.148542	0.0482874	0.553005	0.712854	0.941469	0.546734	0.45695	0.283306	-0.217301	-0.855483	red	UCA1
ENSG00000221955	-0.24375	-0.860913	-0.345889	0.0204213	0.36682	0.577511	0.822318	0.588499	0.378292	0.530592	-0.0305842	-0.751648	red	SLC12A8
ENSG00000225383	-0.0968866	-0.548853	0.191292	0.386434	0.760479	0.486785	0.95168	0.64122	0.540454	-0.104343	-0.0858259	-0.632924	red	SFTA1P
ENSG00000228409	-0.0948393	-0.759436	-0.126736	0.10936	0.660019	0.67956	0.950538	0.643156	0.307483	0.251212	-0.139636	-0.826384	red	CCT6P1
ENSG00000231742	-0.171241	-0.240196	0.122748	0.283831	0.122508	0.0907369	0.606979	0.504072	0.770573	-0.312502	0.0925082	-0.191133	red	LINC01273
ENSG00000232956	0.131098	-0.611246	-0.210859	-0.185599	0.372521	0.815984	0.921	0.490639	0.329596	0.169769	-0.344994	-0.90502	red	SNHG15
ENSG00000233532	-0.0953893	-0.757919	-0.448455	-0.22112	0.355451	0.674009	0.783966	0.675265	0.0756491	0.340029	-0.076954	-0.769413	red	LINC00460
ENSG00000234689	-0.0314463	-0.36252	0.264899	0.250064	0.41188	0.341402	0.698489	0.435373	0.111631	-0.257915	-0.107877	-0.430915	red	LINC00444
ENSG00000234741	-0.208411	-0.778809	-0.282204	0.0372268	0.398272	0.572071	0.932799	0.76152	0.492219	0.222991	-0.00265971	-0.72346	red	GAS5
ENSG00000241322	-0.150926	-0.400221	0.253598	0.472548	0.586893	0.280101	0.833861	0.575616	0.792403	-0.212973	0.00281512	-0.425637	red	CDRT1
ENSG00000251155	-0.191623	-0.724485	-0.720091	-0.411918	-0.200636	0.508652	0.551889	0.495614	0.345861	0.593707	0.000665541	-0.610313	red	SEPT14P4
ENSG00000255524	-0.145155	-0.377801	0.0496995	0.269832	0.281349	0.263074	0.725647	0.505399	0.865266	-0.0985303	0.00478439	-0.39133	red	NPIPB8
ENSG00000255717	-0.168655	-0.748695	-0.308147	-0.0462087	0.342961	0.588859	0.905222	0.763908	0.36306	0.170006	-0.0193365	-0.717062	red	SNHG1
ENSG00000258602	-0.0883801	-0.70645	-0.140562	0.0399277	0.526723	0.640916	0.946167	0.7149	0.250904	0.0837345	-0.104805	-0.763643	red	LINC01629
ENSG00000281162	-0.20505	-0.600363	0.0917456	0.348696	0.77597	0.387733	0.80938	0.725503	0.155419	-0.0533245	0.069156	-0.517207	red	LINC01127
ENSG00000001629	0.439278	0.917852	0.365201	-0.167775	-0.406264	-0.384904	-0.717706	-0.654304	-0.354929	-0.618007	-0.175737	0.587417	magenta	ANKIB1
ENSG00000003096	0.510053	0.860794	0.586408	0.027552	0.0186245	-0.250116	-0.595982	-0.707475	-0.465772	-0.573051	-0.300357	0.42739	magenta	KLHL13
ENSG00000005020	0.374631	0.94312	0.624067	0.114697	-0.306905	-0.491128	-0.637185	-0.676277	-0.133077	-0.735001	-0.151952	0.648948	magenta	SKAP2
ENSG00000005339	0.454788	0.966692	0.55631	-0.0266175	-0.314994	-0.422075	-0.695951	-0.705586	-0.374653	-0.722856	-0.204403	0.615433	magenta	CREBBP
ENSG00000007237	0.332176	0.835266	0.641676	0.192191	-0.282745	-0.433481	-0.495727	-0.651583	0.0978563	-0.650491	-0.179249	0.546154	magenta	GAS7
ENSG00000011677	0.660978	0.904362	0.29086	-0.427783	-0.6053	-0.104598	-0.597134	-0.819954	-0.289975	-0.531772	-0.470588	0.321825	magenta	GABRA3
ENSG00000012963	0.488581	0.584944	0.21737	-0.198262	-0.237524	-0.00256662	-0.446079	-0.788137	0.00966329	-0.0302731	-0.434247	0.114225	magenta	UBR7
ENSG00000023516	0.257034	0.892905	0.543997	0.121319	-0.362914	-0.601939	-0.756223	-0.665891	-0.273536	-0.620895	-0.0277971	0.75214	magenta	AKAP11
ENSG00000048991	0.713388	0.877093	0.229678	-0.519161	-0.492279	-0.0153082	-0.610567	-0.785552	-0.545491	-0.502385	-0.498684	0.257763	magenta	R3HDM1
ENSG00000049130	0.587854	0.965467	0.562816	-0.149434	-0.407755	-0.260868	-0.600151	-0.783581	-0.364328	-0.733478	-0.378703	0.462911	magenta	KITLG
ENSG00000049618	0.445708	0.922511	0.325759	-0.200408	-0.450877	-0.386385	-0.764845	-0.715638	-0.341278	-0.538676	-0.190136	0.589247	magenta	ARID1B
ENSG00000057704	0.730971	0.901751	0.278559	-0.46999	-0.502349	-0.0220438	-0.623191	-0.892745	-0.408182	-0.43966	-0.546626	0.250153	magenta	TMCC3
ENSG00000058056	0.663543	0.911557	0.31216	-0.400727	-0.534245	-0.100565	-0.569813	-0.77049	-0.283373	-0.585176	-0.457554	0.320813	magenta	USP13
ENSG00000058335	0.342129	0.53834	0.612779	0.14314	-0.0280972	-0.0858852	0.0630066	-0.113983	0.0507254	-0.930634	-0.217367	0.177828	magenta	RASGRF1
ENSG00000060749	0.735024	0.917663	0.619171	-0.194263	-0.318911	-0.0335197	-0.436864	-0.864021	-0.311241	-0.681988	-0.594245	0.226599	magenta	QSER1
ENSG00000065534	0.517719	0.802605	0.800057	0.195796	-0.0122447	-0.145167	-0.151382	-0.495122	0.111331	-0.915813	-0.380316	0.267095	magenta	MYLK
ENSG00000066027	0.274272	0.851167	0.311329	-0.0749049	-0.484473	-0.55645	-0.919682	-0.807118	-0.39164	-0.304434	-0.0576373	0.719783	magenta	PPP2R5A
ENSG00000068650	0.428761	0.923466	0.689446	0.110678	-0.262064	-0.41144	-0.566808	-0.686802	-0.226005	-0.775012	-0.228454	0.569717	magenta	ATP11A
ENSG00000070367	0.781101	0.94752	0.568271	-0.243428	-0.284444	0.000776579	-0.470183	-0.897126	-0.281162	-0.633132	-0.624453	0.205351	magenta	EXOC5
ENSG00000070886	0.348686	0.741912	-0.010245	-0.482697	-0.814368	-0.353456	-0.83979	-0.694633	-0.549999	-0.262687	-0.131907	0.553067	magenta	EPHA8
ENSG00000072364	0.476173	0.929232	0.657691	0.0827338	-0.256816	-0.340222	-0.488417	-0.67176	-0.00725118	-0.776362	-0.282629	0.495693	magenta	AFF4
ENSG00000073711	0.524019	0.75776	0.693415	0.158941	0.22358	-0.136899	-0.457331	-0.75167	-0.367967	-0.453116	-0.396162	0.270714	magenta	PPP2R3A
ENSG00000074657	0.724116	0.934165	0.510959	-0.304096	-0.313949	-0.0627128	-0.536475	-0.77659	-0.597901	-0.721742	-0.512779	0.294738	magenta	ZNF532
ENSG00000075223	0.271151	0.848814	0.605033	0.162882	-0.26437	-0.548207	-0.700909	-0.667189	-0.357094	-0.610316	-0.0676257	0.688752	magenta	SEMA3C
ENSG00000075461	0.184139	0.83017	0.442068	0.102302	-0.441072	-0.638799	-0.817179	-0.702175	-0.232847	-0.443005	0.0197502	0.770742	magenta	CACNG4
ENSG00000077147	0.444919	0.908762	0.762838	0.19341	-0.138441	-0.382144	-0.547582	-0.752603	-0.193511	-0.70641	-0.275687	0.523944	magenta	TM9SF3
ENSG00000080561	0.811622	0.877115	0.562274	-0.27126	-0.12666	0.126951	-0.298879	-0.692837	-0.373937	-0.770909	-0.635003	0.0885781	magenta	MID2
ENSG00000082805	0.427789	0.955555	0.436942	-0.105612	-0.423393	-0.442795	-0.751262	-0.708731	-0.333695	-0.640769	-0.169726	0.639824	magenta	ERC1
ENSG00000091039	0.676366	0.986787	0.496017	-0.250894	-0.371945	-0.169269	-0.623482	-0.838147	-0.401869	-0.664993	-0.457673	0.391866	magenta	OSBPL8
ENSG00000092847	0.489958	0.981412	0.502125	-0.0978432	-0.40905	-0.402236	-0.758969	-0.822709	-0.352992	-0.606792	-0.258431	0.598542	magenta	AGO1
ENSG00000096070	0.381566	0.829521	0.368485	-0.157126	-0.457576	-0.357661	-0.5467	-0.462407	-0.300414	-0.761173	-0.13013	0.54383	magenta	BRPF3
ENSG00000100077	0.132243	0.823843	0.467684	0.181994	-0.339983	-0.695753	-0.846055	-0.667003	-0.266703	-0.439556	0.0865238	0.822002	magenta	ADRBK2
ENSG00000100393	0.424481	0.924278	0.518647	-0.0601957	-0.4538	-0.426903	-0.689358	-0.732398	-0.338523	-0.664739	-0.207347	0.606538	magenta	EP300
ENSG00000100852	0.835938	0.896036	0.689113	-0.197161	-0.161758	0.125803	-0.267683	-0.797818	-0.305221	-0.785303	-0.705843	0.0716528	magenta	ARHGAP5
ENSG00000102189	0.682655	0.955819	0.386412	-0.374006	-0.458008	-0.140142	-0.675382	-0.846744	-0.559123	-0.590416	-0.459195	0.377271	magenta	EEA1
ENSG00000102531	0.549938	0.984127	0.517822	-0.127448	-0.336023	-0.321531	-0.685665	-0.771765	-0.382877	-0.682624	-0.307551	0.529815	magenta	FNDC3A
ENSG00000105855	0.485724	0.627295	0.708906	0.0898262	-0.0686291	-0.050274	-0.158276	-0.535514	-0.26225	-0.696126	-0.416389	0.15829	magenta	ITGB8
ENSG00000105887	0.853475	0.906431	0.497838	-0.355373	-0.220854	0.131015	-0.434594	-0.878564	-0.430387	-0.587968	-0.695438	0.0924725	magenta	MTPN
ENSG00000106031	0.22051	0.835119	0.457902	0.0597371	-0.421318	-0.599695	-0.791091	-0.657252	-0.38465	-0.530906	0.000772396	0.748893	magenta	HOXA13
ENSG00000106546	0.447301	0.890704	0.554244	0.0179946	-0.294425	-0.325959	-0.459514	-0.567843	0.0197837	-0.782461	-0.235217	0.485907	magenta	AHR
ENSG00000106692	0.217979	0.872132	0.589096	0.225552	-0.298729	-0.625231	-0.721505	-0.672184	-0.105445	-0.580066	-0.0130075	0.749688	magenta	FKTN
ENSG00000106723	0.817509	0.942051	0.553316	-0.285699	-0.235743	0.0553989	-0.440696	-0.856864	-0.358636	-0.667542	-0.647214	0.163414	magenta	SPIN1
ENSG00000107669	0.401862	0.814149	0.174898	-0.283192	-0.412899	-0.335411	-0.772534	-0.640773	-0.478022	-0.397441	-0.146378	0.537765	magenta	ATE1
ENSG00000108021	0.767277	0.902248	0.754468	-0.0900972	-0.117724	0.0299811	-0.305151	-0.785953	-0.326975	-0.808633	-0.631408	0.156187	magenta	FAM208B
ENSG00000108091	0.382018	0.8702	0.162683	-0.314531	-0.615469	-0.432545	-0.900809	-0.770366	-0.482092	-0.347984	-0.133352	0.637533	magenta	CCDC6
ENSG00000108946	0.786361	0.914082	0.343232	-0.486257	-0.464421	0.0227649	-0.617038	-0.925018	-0.594826	-0.488198	-0.604733	0.217886	magenta	PRKAR1A
ENSG00000111110	0.553058	0.951255	0.604273	-0.0353491	-0.157704	-0.297056	-0.682346	-0.814727	-0.501696	-0.620945	-0.333852	0.493223	magenta	PPM1H
ENSG00000113300	0.310628	0.887068	0.250174	-0.176493	-0.619527	-0.523754	-0.836903	-0.69761	-0.246627	-0.465158	-0.0622705	0.70544	magenta	CNOT6
ENSG00000113448	0.625721	0.92342	0.317992	-0.371749	-0.58524	-0.166718	-0.630802	-0.817968	-0.271217	-0.544873	-0.425039	0.380223	magenta	PDE4D
ENSG00000113494	0.617197	0.845958	0.783936	0.153411	0.105502	-0.0764559	-0.262451	-0.682	0.0187293	-0.731643	-0.486747	0.213333	magenta	PRLR
ENSG00000113594	0.690034	0.941136	0.660159	-0.0880262	-0.234057	-0.0921769	-0.396928	-0.779509	-0.118935	-0.763244	-0.526918	0.27488	magenta	LIFR
ENSG00000113657	0.528069	0.935358	0.767144	0.153987	-0.0475946	-0.306445	-0.56215	-0.814353	-0.264114	-0.66956	-0.354464	0.463594	magenta	DPYSL3
ENSG00000113721	0.151407	0.417466	0.529532	0.401704	0.274653	-0.180669	0.036105	-0.0983448	0.526724	-0.556894	-0.0645076	0.19932	magenta	PDGFRB
ENSG00000113749	0.395533	0.891063	0.656395	0.123718	-0.176323	-0.397314	-0.473945	-0.502704	-0.172712	-0.883834	-0.161107	0.557968	magenta	HRH2
ENSG00000113790	0.20041	0.855552	0.365962	0.0709338	-0.373449	-0.62403	-0.828766	-0.655781	-0.133635	-0.430719	0.039959	0.768506	magenta	EHHADH
ENSG00000114302	0.797861	0.935057	0.609098	-0.238082	-0.206029	0.0176308	-0.50753	-0.93351	-0.516991	-0.6097	-0.643759	0.195812	magenta	PRKAR2A
ENSG00000114450	0.770022	0.914265	0.319989	-0.499128	-0.534999	0.0139281	-0.567847	-0.86159	-0.469465	-0.552152	-0.5825	0.224095	magenta	GNB4
ENSG00000115808	0.622847	0.972377	0.645065	-0.0342683	-0.194498	-0.211418	-0.534121	-0.804267	-0.189406	-0.705674	-0.428815	0.397343	magenta	STRN
ENSG00000115904	0.316037	0.935231	0.526958	0.0648962	-0.378933	-0.562765	-0.748281	-0.673746	-0.240392	-0.661673	-0.0705461	0.728927	magenta	SOS1
ENSG00000116128	0.366637	0.924291	0.585538	0.102748	-0.184289	-0.478877	-0.65946	-0.610477	-0.279659	-0.726595	-0.112547	0.649586	magenta	BCL9
ENSG00000116539	0.374952	0.919579	0.581512	0.0521354	-0.344868	-0.46418	-0.601705	-0.595993	-0.213228	-0.794928	-0.137946	0.632451	magenta	ASH1L
ENSG00000116675	0.61589	0.8228	0.881723	0.193037	0.141872	-0.0497545	-0.126645	-0.539146	-0.0651338	-0.946696	-0.478509	0.187597	magenta	DNAJC6
ENSG00000116990	0.214963	0.686817	0.787563	0.473345	0.263134	-0.396698	-0.224711	-0.243441	0.0505323	-0.867127	-0.0292123	0.479125	magenta	MYCL
ENSG00000117155	0.782051	0.963016	0.481006	-0.35098	-0.368345	-0.0230187	-0.574567	-0.91032	-0.485832	-0.606309	-0.59512	0.254272	magenta	SSX2IP
ENSG00000118200	0.776827	0.934415	0.543461	-0.303553	-0.348382	0.0155727	-0.408792	-0.77385	-0.356036	-0.771286	-0.595977	0.204129	magenta	CAMSAP2
ENSG00000119912	0.831753	0.896333	0.562858	-0.267439	-0.147172	0.105168	-0.453589	-0.934361	-0.432562	-0.530859	-0.695891	0.102356	magenta	IDE
ENSG00000120137	0.475508	0.907778	0.40839	-0.131124	-0.407584	-0.318061	-0.596417	-0.666689	-0.0844825	-0.628988	-0.251288	0.499651	magenta	PANK3
ENSG00000120802	0.851541	0.924147	0.600561	-0.287166	-0.187925	0.100352	-0.441179	-0.909282	-0.519121	-0.64084	-0.701074	0.119883	magenta	TMPO
ENSG00000121481	0.769094	0.828495	0.29353	-0.495247	-0.34737	0.114526	-0.43348	-0.686325	-0.520666	-0.60028	-0.569778	0.122568	magenta	RNF2
ENSG00000121964	0.473109	0.874786	0.348052	-0.174742	-0.410898	-0.284963	-0.579329	-0.633577	-0.0869534	-0.594239	-0.24891	0.467476	magenta	GTDC1
ENSG00000122035	0.545894	0.896475	0.196251	-0.430978	-0.673937	-0.25753	-0.800317	-0.861906	-0.462391	-0.386506	-0.33196	0.476801	magenta	RASL11A
ENSG00000123094	0.377179	0.931628	0.655246	0.166146	-0.245308	-0.474762	-0.609817	-0.700417	-0.0448046	-0.695688	-0.173783	0.619262	magenta	RASSF8
ENSG00000123552	0.823817	0.795264	0.596446	-0.303526	-0.161189	0.197434	-0.256043	-0.72774	-0.60226	-0.730246	-0.697358	0.00937562	magenta	USP45
ENSG00000124120	0.623807	0.974689	0.417857	-0.297059	-0.465405	-0.231767	-0.716138	-0.84833	-0.496931	-0.598825	-0.394378	0.45881	magenta	TTPAL
ENSG00000124782	0.315865	0.844716	0.159128	-0.290005	-0.666068	-0.490597	-0.896919	-0.706678	-0.501854	-0.387842	-0.0631355	0.688399	magenta	RREB1
ENSG00000128513	0.582548	0.877787	0.422938	-0.159063	-0.256921	-0.172366	-0.607661	-0.835321	-0.187302	-0.426367	-0.407312	0.351673	magenta	POT1
ENSG00000130164	0.157417	0.535218	0.621132	0.376526	0.0124966	-0.297358	-0.00612679	-0.113436	0.476745	-0.804756	-0.04173	0.337565	magenta	LDLR
ENSG00000130748	0.537113	0.817365	0.413774	-0.163115	-0.126777	-0.193424	-0.703041	-0.805507	-0.65552	-0.370648	-0.341554	0.386608	magenta	TMEM160
ENSG00000131374	0.456596	0.939591	0.751163	0.206225	-0.0477839	-0.385301	-0.558192	-0.718377	-0.155583	-0.729037	-0.256448	0.536781	magenta	TBC1D5
ENSG00000131873	0.768936	0.912359	0.664955	-0.179265	-0.189485	0.0342056	-0.302155	-0.704243	-0.322408	-0.865736	-0.598365	0.16984	magenta	CHSY1
ENSG00000132623	0.797137	0.878701	0.637709	-0.151311	-0.097574	0.0975346	-0.325227	-0.85221	-0.170422	-0.618031	-0.678553	0.0832536	magenta	ANKEF1
ENSG00000133250	0.552591	0.784128	0.216721	-0.384013	-0.344619	-0.148959	-0.765492	-0.814021	-0.782097	-0.275931	-0.350078	0.36452	magenta	ZNF414
ENSG00000133665	0.515044	0.512896	0.0464845	-0.583855	-0.625475	0.0993107	-0.306384	-0.428872	-0.576939	-0.447267	-0.385821	0.0833386	magenta	DYDC2
ENSG00000133739	0.751449	0.914874	0.487041	-0.275005	-0.241164	-0.0175933	-0.58745	-0.952359	-0.450262	-0.462761	-0.59155	0.227434	magenta	LRRCC1
ENSG00000133863	0.438528	0.86949	0.699275	0.173485	-0.117442	-0.360429	-0.603171	-0.834668	-0.20111	-0.522166	-0.294367	0.49288	magenta	TEX15
ENSG00000134318	0.732019	0.956882	0.421338	-0.366663	-0.426774	-0.0682902	-0.572797	-0.826125	-0.419853	-0.644274	-0.522622	0.300522	magenta	ROCK2
ENSG00000134504	0.422828	0.471936	-0.397513	-0.825413	-0.804545	0.0229542	-0.623499	-0.528135	-0.568248	0.0267553	-0.256803	0.176398	magenta	KCTD1
ENSG00000135108	0.627157	0.95219	0.454356	-0.242914	-0.322426	-0.211563	-0.728249	-0.877642	-0.57838	-0.531592	-0.407587	0.43272	magenta	FBXO21
ENSG00000135373	0.503157	0.946261	0.40057	-0.186135	-0.459487	-0.360995	-0.81607	-0.897692	-0.401581	-0.44202	-0.290408	0.558556	magenta	EHF
ENSG00000135913	0.687386	0.947622	0.500491	-0.279413	-0.463537	-0.124655	-0.568502	-0.865331	-0.374088	-0.644734	-0.508498	0.33538	magenta	USP37
ENSG00000135966	0.574259	0.719115	0.606575	0.0294262	0.080915	0.023052	-0.0957172	-0.403203	0.0520794	-0.800221	-0.422213	0.116726	magenta	TGFBRAP1
ENSG00000136021	0.522974	0.929492	0.63262	0.0656017	-0.11876	-0.297883	-0.599929	-0.810401	-0.169114	-0.580282	-0.337202	0.461038	magenta	SCYL2
ENSG00000137770	0.398549	0.881643	0.524646	0.0418911	-0.367684	-0.388789	-0.543036	-0.666935	0.0914407	-0.638152	-0.212702	0.531603	magenta	CTDSPL2
ENSG00000137962	0.754448	0.883624	0.82271	0.0127464	0.0375213	0.0481821	-0.2049	-0.696107	-0.214494	-0.880177	-0.617217	0.124381	magenta	ARHGAP29
ENSG00000138642	0.608375	0.90237	0.562943	-0.0805656	-0.0803521	-0.178811	-0.629932	-0.841977	-0.484205	-0.515914	-0.416216	0.371057	magenta	HERC6
ENSG00000140262	0.358129	0.867384	0.261429	-0.197871	-0.444662	-0.443855	-0.805764	-0.634213	-0.463551	-0.504294	-0.0861389	0.644134	magenta	TCF12
ENSG00000140263	0.464554	0.914849	0.410742	-0.125988	-0.290922	-0.369767	-0.794714	-0.789499	-0.486835	-0.475625	-0.225273	0.56781	magenta	SORD
ENSG00000140396	0.300606	0.891111	0.279296	-0.134289	-0.53592	-0.551364	-0.906722	-0.752238	-0.367311	-0.40171	-0.051385	0.733214	magenta	NCOA2
ENSG00000140406	0.703972	0.865775	0.837455	0.0448327	0.060606	-0.00623807	-0.248617	-0.6718	-0.365126	-0.884526	-0.557213	0.178693	magenta	MESDC1
ENSG00000140807	0.578506	0.863849	0.552219	-0.127845	-0.131025	-0.183481	-0.601105	-0.729387	-0.706447	-0.627137	-0.368086	0.387615	magenta	NKD1
ENSG00000140832	0.467027	0.725528	0.695698	0.128884	0.0729814	-0.195454	-0.487991	-0.732162	-0.568322	-0.495723	-0.346386	0.329654	magenta	MARVELD3
ENSG00000141429	0.64097	0.984736	0.705115	-0.0103296	-0.159279	-0.208268	-0.536073	-0.826845	-0.278687	-0.738504	-0.449456	0.397119	magenta	GALNT1
ENSG00000141933	0.526426	0.683953	0.511433	-0.0713672	-0.0355274	-0.0921808	-0.559882	-0.832513	-0.667393	-0.278004	-0.423765	0.241622	magenta	TPGS1
ENSG00000143970	0.654944	0.941831	0.771368	0.043923	-0.11403	-0.141299	-0.394935	-0.783621	-0.144497	-0.788324	-0.498934	0.309632	magenta	ASXL2
ENSG00000144036	0.248333	0.875361	0.636576	0.257069	-0.252067	-0.579917	-0.63234	-0.641361	0.0137187	-0.644026	-0.0517806	0.698463	magenta	EXOC6B
ENSG00000144228	0.392062	0.720061	0.270696	-0.175779	-0.436039	-0.20997	-0.351071	-0.396422	0.115928	-0.643937	-0.198369	0.359873	magenta	SPOPL
ENSG00000144320	0.662467	0.924887	0.740018	0.035417	0.0231205	-0.126788	-0.487249	-0.835036	-0.353135	-0.659207	-0.496864	0.304514	magenta	KIAA1715
ENSG00000145012	0.684987	0.985326	0.667916	-0.0797586	-0.170523	-0.156038	-0.541214	-0.847046	-0.339842	-0.715298	-0.491696	0.356579	magenta	LPP
ENSG00000145604	0.603709	0.965612	0.740518	0.0560922	-0.146709	-0.23567	-0.51273	-0.821463	-0.201191	-0.730788	-0.429271	0.407314	magenta	SKP2
ENSG00000145743	0.613752	0.941711	0.392626	-0.280305	-0.352108	-0.208292	-0.713671	-0.82072	-0.526529	-0.540887	-0.380384	0.432784	magenta	FBXL17
ENSG00000148730	0.178077	0.820899	0.175601	-0.122046	-0.570693	-0.630004	-0.93622	-0.652574	-0.34548	-0.334331	0.0811549	0.797684	magenta	EIF4EBP2
ENSG00000151276	0.586879	0.951984	0.755766	0.0928855	-0.0158337	-0.243325	-0.528519	-0.775641	-0.332855	-0.737908	-0.392232	0.419989	magenta	MAGI1
ENSG00000151458	0.445392	0.896802	0.56759	-0.00983351	-0.376827	-0.345067	-0.481924	-0.584125	-0.087309	-0.816042	-0.235007	0.510788	magenta	ANKRD50
ENSG00000151491	0.595804	0.967738	0.458826	-0.214441	-0.353714	-0.246471	-0.661996	-0.766941	-0.416129	-0.65916	-0.354437	0.465084	magenta	EPS8
ENSG00000151892	0.151141	0.825194	0.678854	0.380478	-0.0861705	-0.660245	-0.683096	-0.593186	-0.156251	-0.599776	0.0537555	0.76545	magenta	GFRA1
ENSG00000151893	0.684401	0.939373	0.654286	-0.0677204	-0.132559	-0.120834	-0.550813	-0.91946	-0.331961	-0.571959	-0.52806	0.305796	magenta	CACUL1
ENSG00000152078	0.408325	0.941951	0.389437	-0.125104	-0.436749	-0.46705	-0.846549	-0.788235	-0.419237	-0.50369	-0.159106	0.662846	magenta	TMEM56
ENSG00000152217	0.645147	0.949986	0.696028	-0.0180543	-0.131811	-0.150401	-0.406044	-0.69409	-0.183561	-0.841881	-0.44814	0.336631	magenta	SETBP1
ENSG00000152332	0.79681	0.958873	0.627874	-0.222607	-0.191905	0.0112602	-0.437587	-0.82259	-0.429002	-0.757665	-0.613468	0.208496	magenta	UHMK1
ENSG00000153317	0.597506	0.753506	0.86811	0.184556	0.085075	-0.00646708	-0.0463408	-0.516702	-0.00306909	-0.917017	-0.499537	0.125246	magenta	ASAP1
ENSG00000153827	0.775227	0.951397	0.565549	-0.255434	-0.284085	-0.000197635	-0.42597	-0.799902	-0.294439	-0.743133	-0.593329	0.21519	magenta	TRIP12
ENSG00000154556	0.484445	0.684895	0.558417	0.116105	0.167904	-0.103238	-0.42449	-0.732116	-0.145688	-0.299761	-0.383451	0.216266	magenta	SORBS2
ENSG00000159023	0.442542	0.896343	0.262878	-0.254173	-0.473783	-0.365192	-0.773758	-0.69998	-0.38604	-0.496957	-0.18491	0.572183	magenta	EPB41
ENSG00000160007	0.293926	0.917431	0.577919	0.131819	-0.340744	-0.566522	-0.680297	-0.626388	-0.152419	-0.712163	-0.0590559	0.718534	magenta	ARHGAP35
ENSG00000160551	0.611824	0.95331	0.73116	0.0198144	-0.208204	-0.212857	-0.472989	-0.793282	-0.20406	-0.772936	-0.442221	0.386121	magenta	TAOK1
ENSG00000160710	0.54163	0.987097	0.500187	-0.138022	-0.421367	-0.34097	-0.718694	-0.839861	-0.317063	-0.616101	-0.31912	0.541403	magenta	ADAR
ENSG00000162688	0.223149	0.878581	0.338632	-0.0264081	-0.525773	-0.632375	-0.883311	-0.697381	-0.288534	-0.456604	0.0228279	0.795014	magenta	AGL
ENSG00000163694	0.775694	0.903679	0.365323	-0.418187	-0.412785	0.0413583	-0.508809	-0.857292	-0.319843	-0.532068	-0.603233	0.180531	magenta	RBM47
ENSG00000163848	0.780918	0.960756	0.562761	-0.259713	-0.233892	-0.0219997	-0.549124	-0.908583	-0.492479	-0.621673	-0.599578	0.244477	magenta	ZNF148
ENSG00000164292	0.657819	0.823687	0.796108	0.109483	0.0226938	-0.0209505	-0.25504	-0.785245	-0.0209042	-0.658602	-0.573167	0.151147	magenta	RHOBTB3
ENSG00000164684	0.365431	0.833786	0.756384	0.338219	0.0809439	-0.388641	-0.485474	-0.674008	0.0242572	-0.600996	-0.210103	0.49538	magenta	ZNF704
ENSG00000164742	0.269597	0.889497	0.668939	0.252897	-0.133118	-0.561785	-0.60934	-0.536235	-0.183643	-0.780343	-0.0279558	0.703568	magenta	ADCY1
ENSG00000165650	0.818699	0.853942	0.72071	-0.112751	-0.0545354	0.158129	-0.173828	-0.755581	-0.123977	-0.76643	-0.71194	0.0154297	magenta	PDZD8
ENSG00000165671	0.723609	0.954274	0.660228	-0.143442	-0.171326	-0.0908192	-0.53756	-0.870881	-0.532125	-0.690051	-0.543096	0.300291	magenta	NSD1
ENSG00000165675	0.717945	0.952689	0.463545	-0.295583	-0.320944	-0.0769165	-0.553551	-0.803344	-0.389227	-0.652825	-0.506424	0.30166	magenta	ENOX2
ENSG00000165895	0.680445	0.788684	0.92161	0.209414	0.261661	0.0530503	-0.101481	-0.648279	-0.0929715	-0.81543	-0.589576	0.073652	magenta	ARHGAP42
ENSG00000166106	0.699766	0.737268	0.525673	-0.265377	-0.358561	0.107028	-0.229144	-0.695409	-0.283848	-0.659941	-0.610127	0.0608252	magenta	ADAMTS15
ENSG00000168040	0.722627	0.856944	0.55144	-0.209301	-0.0598606	0.000902169	-0.53169	-0.83574	-0.682137	-0.538902	-0.550427	0.20911	magenta	FADD
ENSG00000169126	0.586645	0.600507	0.709088	0.17798	0.450127	0.136056	-0.0530458	-0.491062	-0.099386	-0.570934	-0.503728	-0.030683	magenta	ARMC4
ENSG00000169184	0.652834	0.721925	0.67967	-0.00173223	0.180338	0.106019	-0.0684247	-0.405216	-0.234827	-0.877885	-0.49493	0.0547456	magenta	MN1
ENSG00000169499	0.850859	0.889239	0.451471	-0.407816	-0.230095	0.136328	-0.481998	-0.882878	-0.585404	-0.546205	-0.684569	0.0973582	magenta	PLEKHA2
ENSG00000169570	0.714779	0.938516	0.706446	-0.10187	-0.153968	-0.0836094	-0.476792	-0.835448	-0.490973	-0.741842	-0.545264	0.283677	magenta	DTWD2
ENSG00000169967	0.698134	0.939586	0.806417	0.0280098	-0.0252992	-0.0905692	-0.381116	-0.770222	-0.327142	-0.829806	-0.532555	0.272735	magenta	MAP3K2
ENSG00000171004	0.122484	0.737055	0.718453	0.434145	-0.0126456	-0.614461	-0.594333	-0.549044	-0.1968	-0.577007	0.0448519	0.697587	magenta	HS6ST2
ENSG00000171522	0.618257	0.738014	0.787448	0.136296	0.0700252	0.0482187	-0.0090434	-0.509817	0.175522	-0.85199	-0.52757	0.0666095	magenta	PTGER4
ENSG00000171813	0.378987	0.292478	0.393036	0.0210944	0.317986	0.12169	-0.248297	-0.538205	-0.663211	-0.0237656	-0.372647	-0.0473234	magenta	PWWP2B
ENSG00000171889	0.741719	0.791888	0.464307	-0.358948	-0.228395	0.114608	-0.303977	-0.582081	-0.606429	-0.776308	-0.556286	0.106665	magenta	MIR31HG
ENSG00000172340	0.435263	0.954285	0.52975	-0.0317045	-0.401411	-0.448648	-0.764675	-0.823259	-0.336703	-0.578	-0.219559	0.628115	magenta	SUCLG2
ENSG00000173212	0.33481	0.362802	-0.366319	-0.758709	-0.901273	0.039633	-0.381515	-0.322125	-0.3055	-0.127016	-0.209863	0.1197	magenta	MAB21L3
ENSG00000173218	0.294342	0.902339	0.693081	0.274461	-0.103474	-0.558015	-0.678739	-0.677688	-0.199895	-0.649224	-0.0795993	0.693332	magenta	VANGL1
ENSG00000174197	0.440029	0.905339	0.499346	-0.0835116	-0.496628	-0.378992	-0.608356	-0.698871	-0.197304	-0.686622	-0.23757	0.551589	magenta	MGA
ENSG00000175344	0.230556	0.80501	0.609461	0.296827	-0.163086	-0.534824	-0.612536	-0.684866	0.103351	-0.471979	-0.0758393	0.628194	magenta	CHRNA7
ENSG00000175697	0.352696	0.837502	0.812367	0.313771	0.0672718	-0.408299	-0.430797	-0.500714	-0.264552	-0.865538	-0.14901	0.540959	magenta	GPR156
ENSG00000176022	0.678748	0.809169	0.306955	-0.444368	-0.390115	-0.0222714	-0.65644	-0.861728	-0.821282	-0.390272	-0.504233	0.248709	magenta	B3GALT6
ENSG00000176105	0.804442	0.929969	0.511087	-0.324926	-0.234096	0.0336877	-0.547496	-0.913522	-0.57591	-0.568532	-0.628774	0.194796	magenta	YES1
ENSG00000177465	0.768486	0.864396	0.786645	-0.0309542	-0.0124493	0.0619836	-0.297087	-0.845824	-0.312509	-0.697623	-0.666391	0.106404	magenta	ACOT4
ENSG00000177565	0.79904	0.934728	0.612132	-0.201414	-0.171366	0.0372933	-0.432562	-0.888083	-0.298462	-0.636339	-0.648143	0.165092	magenta	TBL1XR1
ENSG00000178502	0.759952	0.839487	0.719678	-0.103975	-0.0947714	0.106093	-0.13859	-0.61951	-0.176586	-0.901338	-0.62541	0.0711987	magenta	KLHL11
ENSG00000178966	0.6125	0.9659	0.407332	-0.287701	-0.450676	-0.24392	-0.759513	-0.894596	-0.524079	-0.522088	-0.391809	0.466769	magenta	RMI1
ENSG00000179862	0.558661	0.810473	0.108474	-0.514802	-0.598208	-0.170685	-0.824319	-0.867242	-0.716863	-0.241209	-0.356545	0.396423	magenta	CITED4
ENSG00000180008	0.669813	0.890713	0.644728	-0.118008	-0.285937	-0.0645326	-0.313689	-0.67924	-0.150551	-0.839286	-0.511138	0.244634	magenta	SOCS4
ENSG00000180801	0.514932	0.967052	0.506528	-0.128768	-0.452771	-0.361211	-0.725528	-0.840327	-0.361479	-0.607608	-0.301987	0.556067	magenta	ARSJ
ENSG00000181588	0.509742	0.741613	0.162516	-0.417106	-0.381036	-0.158125	-0.748391	-0.725423	-0.845229	-0.299836	-0.296198	0.375229	magenta	MEX3D
ENSG00000182150	0.577059	0.909009	0.643756	-0.0160766	-0.299766	-0.213265	-0.484451	-0.818602	-0.0914168	-0.650816	-0.432685	0.371882	magenta	ERCC6L2
ENSG00000183826	0.183812	0.856192	0.486386	0.144824	-0.278947	-0.644079	-0.7558	-0.526153	-0.310284	-0.644532	0.0825978	0.795753	magenta	BTBD9
ENSG00000183853	0.449336	0.757852	0.605523	0.0446423	-0.26224	-0.242674	-0.491885	-0.787959	-0.23185	-0.477108	-0.352104	0.366082	magenta	KIRREL
ENSG00000184838	0.735302	0.763587	0.736131	-0.0350619	-0.0624506	0.149282	-0.0603334	-0.656297	0.0134806	-0.778018	-0.663497	-0.00957828	magenta	PRR16
ENSG00000185730	0.3615	0.635857	0.488577	0.0610422	0.068112	-0.242639	-0.613288	-0.699878	-0.674738	-0.260356	-0.22711	0.373771	magenta	ZNF696
ENSG00000186073	0.649811	0.911382	0.446504	-0.247395	-0.216444	-0.131909	-0.636369	-0.795566	-0.569687	-0.559044	-0.429237	0.352633	magenta	C15orf41
ENSG00000186260	0.269076	0.872143	0.274194	-0.130133	-0.571152	-0.553386	-0.79831	-0.596334	-0.266744	-0.552823	-0.00255912	0.733169	magenta	MKL2
ENSG00000187068	0.314589	0.929745	0.567874	0.134187	-0.272184	-0.564155	-0.772016	-0.736245	-0.227577	-0.5775	-0.0858885	0.718737	magenta	C3orf70
ENSG00000187079	0.633041	0.946508	0.571551	-0.112072	-0.3129	-0.184587	-0.572491	-0.89302	-0.179357	-0.574048	-0.469953	0.366009	magenta	TEAD1
ENSG00000187994	0.386018	0.375168	0.0229658	-0.383022	-0.561888	0.127147	-0.00287314	-0.239082	0.272342	-0.398279	-0.329786	-0.0304721	magenta	RINL
ENSG00000188064	0.576719	0.908008	0.413779	-0.295263	-0.531786	-0.229212	-0.655461	-0.790155	-0.517128	-0.615423	-0.371455	0.441513	magenta	WNT7B
ENSG00000188486	0.581399	0.787789	0.108241	-0.550932	-0.564957	-0.112198	-0.740613	-0.761875	-0.792182	-0.347833	-0.364391	0.348426	magenta	H2AFX
ENSG00000196369	0.40678	0.82763	0.60985	0.136836	0.0681279	-0.330172	-0.535795	-0.556325	-0.352034	-0.664921	-0.180987	0.489047	magenta	SRGAP2B
ENSG00000196911	0.237139	0.538509	0.0413108	-0.247604	-0.585141	-0.217045	-0.300811	-0.250559	0.240337	-0.465159	-0.0760085	0.333014	magenta	KPNA5
ENSG00000197258	0.44118	0.703741	0.106882	-0.345638	-0.512765	-0.210546	-0.792997	-0.911382	-0.398097	9.00586e-05	-0.31218	0.373049	magenta	EIF4BP6
ENSG00000197483	0.497127	0.695916	0.771203	0.274671	0.388125	-0.0934765	-0.298918	-0.622075	-0.252325	-0.534638	-0.384208	0.203836	magenta	ZNF628
ENSG00000198081	0.347196	0.863187	0.646648	0.172076	-0.032892	-0.453153	-0.630805	-0.58843	-0.446147	-0.700454	-0.110182	0.61326	magenta	ZBTB14
ENSG00000198146	0.664279	0.936922	0.396503	-0.352063	-0.487208	-0.127084	-0.559331	-0.738865	-0.38449	-0.697467	-0.442747	0.353645	magenta	ZNF770
ENSG00000198160	0.559151	0.962908	0.403368	-0.239839	-0.520951	-0.296872	-0.72704	-0.861435	-0.304895	-0.540409	-0.347037	0.501463	magenta	MIER1
ENSG00000198265	0.463356	0.967312	0.477288	-0.0919724	-0.364099	-0.412785	-0.743977	-0.740698	-0.367483	-0.642171	-0.210049	0.612302	magenta	HELZ
ENSG00000198677	0.662238	0.989428	0.532589	-0.20621	-0.356583	-0.200099	-0.667838	-0.905233	-0.430609	-0.609025	-0.458891	0.414515	magenta	TTC37
ENSG00000198898	0.682122	0.962354	0.390543	-0.343172	-0.442395	-0.144549	-0.679978	-0.887616	-0.441975	-0.537757	-0.471122	0.371867	magenta	CAPZA2
ENSG00000203995	0.515027	0.860232	0.83521	0.201874	0.00992963	-0.217875	-0.268432	-0.530709	-0.117561	-0.953243	-0.341178	0.361371	magenta	ZYG11A
ENSG00000204334	0.230304	0.413927	-0.147355	-0.393137	-0.691654	-0.180001	-0.638126	-0.711014	-0.163053	0.241265	-0.183831	0.276309	magenta	ERICH2
ENSG00000205133	0.692125	0.837621	0.568342	-0.114952	-0.00257744	0.0249131	-0.326345	-0.656049	-0.217815	-0.675392	-0.519428	0.158721	magenta	TRIQK
ENSG00000205413	0.394924	0.83126	0.529313	-0.00809919	-0.437557	-0.345697	-0.448646	-0.562635	-0.0277458	-0.75524	-0.213843	0.491952	magenta	SAMD9
ENSG00000212916	0.263874	0.855889	0.596076	0.151112	-0.325762	-0.544454	-0.604852	-0.549488	-0.20289	-0.751707	-0.0437863	0.685915	magenta	MAP10
ENSG00000215612	0.370279	0.753905	0.353336	-0.0987456	-0.279527	-0.356039	-0.818005	-0.848134	-0.610642	-0.201295	-0.206086	0.514666	magenta	HMX1
ENSG00000226085	0.509772	0.89498	0.761449	0.190133	0.1017	-0.271913	-0.477108	-0.672446	-0.25313	-0.732212	-0.314742	0.427925	magenta	UQCRFS1P1
ENSG00000227674	0.45955	0.659766	-0.190363	-0.709666	-0.831626	-0.128744	-0.754606	-0.673385	-0.610547	-0.144093	-0.25977	0.346643	magenta	LINC00355
ENSG00000233608	0.481542	0.721471	0.354345	-0.142379	-0.221718	-0.180846	-0.700596	-0.922089	-0.453185	-0.112478	-0.370298	0.329146	magenta	TWIST2
ENSG00000233822	0.540689	0.781422	0.123849	-0.406839	-0.432711	-0.124505	-0.646385	-0.712502	-0.325325	-0.311524	-0.336526	0.325785	magenta	HIST1H2BN
ENSG00000237248	0.520539	0.865274	0.663176	0.0563184	-0.268478	-0.233367	-0.421743	-0.750832	0.0163719	-0.665073	-0.38943	0.371171	magenta	LINC00987
ENSG00000253103	0.464493	0.600878	0.450046	-0.162969	-0.367514	-0.0385862	-0.179352	-0.417765	-0.26612	-0.70623	-0.355871	0.174419	magenta	LINC01609
ENSG00000254004	0.365294	0.794218	0.316903	-0.178076	-0.494545	-0.334308	-0.496106	-0.418273	-0.182599	-0.741799	-0.123923	0.511407	magenta	ZNF260
ENSG00000255185	0.694321	0.715486	0.235539	-0.553137	-0.467928	0.11229	-0.423564	-0.631095	-0.751234	-0.557324	-0.52315	0.115077	magenta	PDXDC2P
ENSG00000277224	0.522629	0.715303	-0.0339165	-0.554271	-0.543599	-0.106917	-0.774471	-0.792193	-0.586066	-0.0958035	-0.332256	0.317827	magenta	HIST1H2BF
ENSG00000067715	-0.479482	-0.524581	-0.330726	0.217796	0.127348	-0.0976115	0.0111307	0.128344	0.233196	0.800638	0.314094	-0.0540703	lightyellow	SYT1
ENSG00000080503	-0.603616	-0.567487	-0.620133	0.0430535	-0.0727152	-0.209571	-0.167927	0.220408	0.0820445	0.930852	0.497429	0.0798742	lightyellow	SMARCA2
ENSG00000087842	-0.372901	-0.630909	-0.545644	-0.112349	0.16536	0.13458	0.0561239	0.302818	-0.370961	0.774564	0.258064	-0.223425	lightyellow	PIR
ENSG00000089248	-0.625646	-0.64448	-0.481252	0.186863	-0.035712	-0.146358	0.0897385	0.319201	0.398047	0.812214	0.452842	-0.0310163	lightyellow	ERP29
ENSG00000090013	-0.482391	-0.368777	-0.542218	0.0377129	-0.0901765	-0.243675	-0.254818	0.0847361	0.233502	0.820864	0.422092	0.146488	lightyellow	BLVRB
ENSG00000101442	0.0195899	-0.292341	-0.691512	-0.704618	-0.658408	0.279235	-0.0698228	-0.0398279	-0.317186	0.5414	-0.0954553	-0.255013	lightyellow	ACTR5
ENSG00000105650	-0.438053	-0.607022	-0.808277	-0.253574	-0.245525	0.0493178	-0.0280094	0.226876	0.183397	0.968674	0.30859	-0.154674	lightyellow	PDE4C
ENSG00000108423	-0.237282	-0.654782	-0.931181	-0.561996	-0.31511	0.351732	0.139902	0.297278	-0.0245137	0.888105	0.10623	-0.412209	lightyellow	TUBD1
ENSG00000109794	-0.204879	-0.395497	-0.318172	-0.111076	0.155011	0.0948758	-0.0570283	0.128697	-0.615284	0.515379	0.142057	-0.129445	lightyellow	FAM149A
ENSG00000120158	-0.170516	-0.769405	-0.713286	-0.381411	-0.00166948	0.550927	0.431419	0.328131	0.0906076	0.859783	-0.0528236	-0.658051	lightyellow	RCL1
ENSG00000123130	-0.216434	-0.886755	-0.5771	-0.218643	0.282358	0.641545	0.756077	0.671514	0.149657	0.578742	-0.00397414	-0.773315	lightyellow	ACOT9
ENSG00000123131	-0.329819	-0.911599	-0.636591	-0.210195	0.189949	0.516883	0.661783	0.713904	0.0538903	0.60838	0.127115	-0.652298	lightyellow	PRDX4
ENSG00000128656	-0.314472	-0.444946	-0.630356	-0.171426	-0.196313	0.0599737	0.0229583	0.140757	0.444837	0.781754	0.198396	-0.154709	lightyellow	CHN1
ENSG00000128872	-0.198305	-0.18848	-0.321775	-0.0301968	0.00326389	-0.100222	-0.33084	-0.224501	-0.112985	0.740695	0.133146	0.0551678	lightyellow	TMOD2
ENSG00000133874	-0.77903	-0.551382	-0.604879	0.188563	-0.140838	-0.432268	-0.220293	0.331671	0.251441	0.847737	0.705082	0.281322	lightyellow	RNF122
ENSG00000135114	-0.796275	-0.632522	-0.66451	0.159887	-0.211643	-0.348759	-0.0222243	0.482995	0.537605	0.785425	0.696313	0.176239	lightyellow	OASL
ENSG00000138363	-0.169232	-0.827848	-0.47118	-0.139784	0.360541	0.616676	0.627974	0.428262	0.0876436	0.73071	-0.084718	-0.754861	lightyellow	ATIC
ENSG00000138399	-0.334637	-0.648849	-0.950124	-0.526672	-0.393939	0.213969	0.0247676	0.291378	-0.104558	0.916076	0.219085	-0.277938	lightyellow	FASTKD1
ENSG00000140853	-0.45681	-0.542864	-0.839518	-0.301145	-0.419624	-0.0414144	-0.121926	0.189949	0.182648	0.93134	0.350807	-0.0504775	lightyellow	NLRC5
ENSG00000141574	-0.604724	-0.560406	-0.344447	0.253901	0.232766	-0.223253	-0.0676668	0.329923	-0.190956	0.676045	0.51537	0.0924765	lightyellow	SECTM1
ENSG00000159339	-0.502987	-0.907847	-0.816247	-0.200679	-0.039692	0.305692	0.496109	0.698531	0.35694	0.782551	0.314015	-0.463217	lightyellow	PADI4
ENSG00000162543	-0.38104	-0.820985	-0.912664	-0.434203	-0.187809	0.351464	0.334375	0.568412	0.0123494	0.806252	0.231628	-0.451511	lightyellow	UBXN10
ENSG00000171135	-0.213478	-0.499695	-0.846587	-0.540544	-0.302336	0.199388	-0.13852	0.110483	-0.37355	0.886163	0.137665	-0.221368	lightyellow	JAGN1
ENSG00000171984	-0.433242	-0.716445	-0.734954	-0.14654	0.054844	0.178377	0.172838	0.377174	0.197509	0.931459	0.28096	-0.306099	lightyellow	C20orf196
ENSG00000175183	-0.828643	-0.638445	-0.561545	0.30278	0.064884	-0.394512	-0.0912236	0.469956	0.306933	0.824355	0.743593	0.219493	lightyellow	CSRP2
ENSG00000178852	-0.521587	-0.503788	-0.641886	-0.11557	-0.456408	-0.157969	-0.0426544	0.235125	0.342058	0.72107	0.402493	0.0404452	lightyellow	EFCAB13
ENSG00000183655	-0.127438	-0.370219	-0.6429	-0.403435	-0.0649385	0.177603	-0.18378	0.0176121	-0.445702	0.775071	0.0814043	-0.182993	lightyellow	KLHL25
ENSG00000196154	-0.524866	-0.633373	-0.890103	-0.288371	-0.209273	-0.0321359	-0.104517	0.386338	-0.115297	0.904299	0.462987	-0.0497963	lightyellow	S100A4
ENSG00000203711	-0.0246675	-0.301059	-0.896696	-0.822957	-0.651395	0.251143	-0.152965	0.0914055	-0.388708	0.578861	0.022298	-0.198635	lightyellow	C6orf99
ENSG00000204388	-0.370214	-0.597887	-0.56163	-0.118608	0.23773	0.131535	0.112368	0.466772	-0.335255	0.602647	0.31596	-0.200592	lightyellow	HSPA1B
ENSG00000204389	-0.341927	-0.62887	-0.594825	-0.165256	0.230175	0.199584	0.162255	0.476083	-0.313649	0.627372	0.273104	-0.269701	lightyellow	HSPA1A
ENSG00000213885	-0.203401	-0.682171	-0.90693	-0.58885	-0.360358	0.426264	0.262467	0.348775	0.0361596	0.802524	0.0514255	-0.4913	lightyellow	RPL13AP7
ENSG00000227440	-0.657383	-0.725934	-0.729577	-0.0146057	-0.128708	-0.107937	0.014334	0.390393	0.190745	0.955552	0.511346	-0.0476562	lightyellow	ATP5G1P4
ENSG00000235084	-0.395419	-0.282076	-0.65839	-0.189732	-0.381682	-0.235899	-0.391809	-0.0518163	0.106709	0.846222	0.354577	0.17964	lightyellow	CHCHD2P6
ENSG00000256683	-0.373787	-0.440873	-0.616657	-0.148192	-0.124568	-0.0592744	-0.227584	0.0188738	-0.0648048	0.925838	0.277923	-0.0195161	lightyellow	ZNF350
ENSG00000264049	-0.298438	-0.425158	-0.592031	-0.191669	-0.138755	0.0155603	-0.193736	-0.038315	-0.0684282	0.919149	0.185541	-0.088253	lightyellow	MIR4737
ENSG00000269900	-0.298464	-0.425178	-0.592019	-0.191629	-0.138711	0.0155507	-0.193717	-0.0382866	-0.0684057	0.919151	0.185563	-0.0882515	lightyellow	RMRP
ENSG00000278244	-0.157809	-0.327072	-0.310446	-0.0851201	-0.253039	0.121502	0.143024	-0.0224243	0.477776	0.533529	-0.0113498	-0.217088	lightyellow	UPF3BP3
ENSG00000278504	-0.0520569	-0.0192374	-0.240088	-0.0993182	-0.284344	-0.068532	-0.251016	-0.344885	0.315703	0.5405	-0.0248672	0.0356649	lightyellow	UPF3BP2
ENSG00000006468	0.12971	0.0557415	0.704446	0.584485	0.880656	0.138121	0.451623	0.195283	0.0766863	-0.553979	-0.141937	-0.173402	lightgreen	ETV1
ENSG00000008517	-0.0237957	-0.0993976	0.689022	0.729892	0.94901	0.0842825	0.4473	0.16721	0.154112	-0.289628	-0.0645111	-0.179962	lightgreen	IL32
ENSG00000066629	0.12303	0.0806865	0.568056	0.512439	0.814081	0.112146	0.351313	0.138782	0.202859	-0.412901	-0.119461	-0.141002	lightgreen	EML1
ENSG00000074416	-0.186772	-0.424028	-0.114257	0.237347	0.561352	0.191332	0.222833	0.131567	0.181977	0.569201	0.0445984	-0.303911	lightgreen	MGLL
ENSG00000103047	0.23288	0.0164582	0.63359	0.461955	0.864967	0.266078	0.323307	-0.108723	-0.113655	-0.187531	-0.318834	-0.301912	lightgreen	TANGO6
ENSG00000104856	-0.0687283	-0.410071	0.429613	0.522885	0.850864	0.362851	0.832059	0.535103	0.270303	-0.275881	-0.0805173	-0.488474	lightgreen	RELB
ENSG00000106211	-0.514223	-0.779148	-0.188739	0.447252	0.710535	0.159864	0.536176	0.60807	0.35596	0.573005	0.318909	-0.361685	lightgreen	HSPB1
ENSG00000106366	-0.339115	-0.615276	0.209398	0.592078	0.845711	0.243598	0.839821	0.755654	0.444139	-0.0613803	0.178499	-0.421368	lightgreen	SERPINE1
ENSG00000106631	-0.291913	-0.656842	0.0585032	0.475182	0.78611	0.307192	0.635416	0.420933	0.377489	0.423852	0.0594234	-0.494996	lightgreen	MYL7
ENSG00000111700	-0.352581	-0.525662	0.141031	0.603369	0.890688	0.122014	0.544236	0.525223	0.386408	0.20708	0.216645	-0.287893	lightgreen	SLCO1B3
ENSG00000111863	-0.304185	-0.642204	0.0958642	0.525835	0.810566	0.316224	0.821297	0.642153	0.652167	0.164051	0.105069	-0.506735	lightgreen	ADTRP
ENSG00000118777	0.194477	0.0561882	0.739067	0.59342	0.818801	0.232012	0.59424	0.147631	0.445132	-0.554673	-0.260418	-0.290405	lightgreen	ABCG2
ENSG00000119125	-0.101845	-0.351229	0.287543	0.508629	0.93047	0.253809	0.531114	0.347309	0.22217	0.0482378	-0.012715	-0.366985	lightgreen	GDA
ENSG00000121797	-0.256999	-0.479514	0.183523	0.566066	0.807494	0.174647	0.488691	0.288613	0.423	0.336145	0.0691379	-0.343069	lightgreen	CCRL2
ENSG00000128422	-0.103902	-0.256921	0.576574	0.719949	0.989408	0.155157	0.591707	0.343991	0.258507	-0.223449	-0.0108213	-0.278859	lightgreen	KRT17
ENSG00000134013	-0.284574	-0.531171	0.298103	0.590394	0.845277	0.213304	0.757433	0.667696	0.246725	-0.134331	0.14388	-0.367931	lightgreen	LOXL2
ENSG00000134955	-0.157223	-0.467765	0.33282	0.549269	0.927696	0.316974	0.789844	0.604607	0.289608	-0.163835	0.0228319	-0.452933	lightgreen	SLC37A2
ENSG00000135318	0.0926557	-0.0593342	0.732683	0.674822	0.923847	0.188958	0.503364	0.0814048	0.210872	-0.316195	-0.203186	-0.275977	lightgreen	NT5E
ENSG00000138061	0.0598864	-0.169581	0.632678	0.626711	0.909549	0.289985	0.729019	0.329408	0.434994	-0.411152	-0.174188	-0.391729	lightgreen	CYP1B1
ENSG00000139211	-0.408683	-0.557646	0.281585	0.7139	0.890773	0.0938625	0.721802	0.715405	0.416247	-0.0692187	0.271669	-0.275435	lightgreen	AMIGO2
ENSG00000140682	0.00849697	-0.353616	0.5045	0.575315	0.94175	0.396002	0.786559	0.351794	0.365326	-0.164368	-0.186629	-0.527448	lightgreen	TGFB1I1
ENSG00000149591	0.0960076	-0.147281	0.618431	0.583431	0.950963	0.275722	0.514627	0.105581	0.094519	-0.186125	-0.22021	-0.361752	lightgreen	TAGLN
ENSG00000149781	-0.0288313	-0.236793	0.591547	0.656733	0.929246	0.210121	0.5499	0.198613	0.167407	-0.14794	-0.115157	-0.326761	lightgreen	FERMT3
ENSG00000151651	-0.361798	-0.487434	0.343697	0.722079	0.867775	0.0896321	0.742041	0.704981	0.48485	-0.185439	0.239493	-0.26077	lightgreen	ADAM8
ENSG00000155792	0.106132	-0.00382012	0.547955	0.498406	0.891111	0.153009	0.319873	0.109893	-0.0589736	-0.281654	-0.128013	-0.186865	lightgreen	DEPTOR
ENSG00000164171	0.193617	-0.0657226	0.716033	0.536981	0.878518	0.331425	0.644429	0.192401	0.118254	-0.495307	-0.288951	-0.391264	lightgreen	ITGA2
ENSG00000164970	-0.0274816	-0.386374	0.322441	0.457666	0.961163	0.380521	0.652232	0.386583	0.137295	-0.0268801	-0.105613	-0.487918	lightgreen	FAM219A
ENSG00000170006	-0.0439872	0.00305009	0.713339	0.723021	0.877813	-0.0428732	0.333615	0.190553	0.0149883	-0.439958	0.0211927	-0.0228763	lightgreen	TMEM154
ENSG00000173432	-0.169617	-0.295687	0.518724	0.736211	0.965232	0.101263	0.508906	0.289907	0.254722	-0.0648635	0.0375411	-0.239904	lightgreen	SAA1
ENSG00000182585	-0.249771	-0.513155	0.302684	0.583821	0.913162	0.234162	0.714065	0.610519	0.178433	-0.0821877	0.112632	-0.381036	lightgreen	EPGN
ENSG00000183111	-0.296903	-0.330912	0.332266	0.694104	0.921195	-0.0163375	0.372545	0.371497	0.21857	0.05697	0.211106	-0.118118	lightgreen	ARHGEF37
ENSG00000188549	0.104271	-0.196175	0.520385	0.438684	0.821763	0.369918	0.743597	0.426456	0.16518	-0.484788	-0.184633	-0.435708	lightgreen	C15orf52
ENSG00000197826	0.443288	0.172445	0.735977	0.348911	0.830103	0.386027	0.399788	-0.136758	-0.138793	-0.467831	-0.488754	-0.371071	lightgreen	C4orf22
ENSG00000219891	0.337464	0.154016	0.405032	0.155098	0.629918	0.243557	0.0118401	-0.303406	-0.396649	-0.0434884	-0.351809	-0.207598	lightgreen	ZSCAN12P1
ENSG00000227507	-0.0104289	-0.121728	0.604875	0.658278	0.946635	0.115898	0.38745	0.119247	0.067398	-0.164273	-0.0804092	-0.204652	lightgreen	LTB
ENSG00000233117	-0.203169	-0.406394	0.284853	0.515129	0.868422	0.191576	0.622433	0.60118	0.0912244	-0.182778	0.126642	-0.301151	lightgreen	LINC00702
ENSG00000236060	-0.188992	-0.516279	0.148954	0.466124	0.843932	0.337209	0.766845	0.596854	0.511679	0.0269552	0.0424492	-0.484419	lightgreen	HSPB1P1
ENSG00000241769	-0.150927	-0.0953827	0.426536	0.614095	0.844098	-0.0849235	0.151379	0.159958	-0.0368046	-0.0690743	0.133005	0.0136471	lightgreen	LINC00893
ENSG00000263006	0.0397523	0.0408791	0.435615	0.49836	0.74586	0.0197408	0.118821	-0.0669877	0.155429	-0.0320803	-0.0708371	-0.0671096	lightgreen	ROCK1P1
ENSG00000264352	-0.0420589	-0.123606	0.701381	0.772121	0.878844	0.0972139	0.548798	0.180716	0.455745	-0.292882	-0.0839027	-0.220387	lightgreen	RN7SL602P
ENSG00000281706	-0.107598	-0.245796	0.0807883	0.318329	0.576236	0.0965427	0.0847085	-0.0581398	0.0703505	0.456944	-0.0100869	-0.185484	lightgreen	LINC01012
ENSG00000000971	-0.421151	-0.532418	0.0745597	0.57371	0.495857	0.063352	0.661455	0.566587	0.937669	0.142159	0.24157	-0.263951	lightcyan	CFH
ENSG00000027697	-0.548435	-0.737512	-0.00687751	0.574621	0.530531	0.0936236	0.735382	0.714309	0.714291	0.250187	0.329463	-0.323016	lightcyan	IFNGR1
ENSG00000070669	-0.411445	-0.339955	0.093469	0.554717	0.268243	-0.139512	0.348247	0.284192	0.904422	0.212991	0.261877	-0.0362632	lightcyan	ASNS
ENSG00000096006	-0.260489	-0.185319	0.230274	0.523092	0.246284	-0.0881244	0.428292	0.292185	0.958279	-0.0967762	0.153726	-0.0502514	lightcyan	CRISP3
ENSG00000105523	-0.527935	-0.518456	-0.321183	0.258116	-0.00631605	-0.082183	0.423456	0.598211	0.920882	0.272289	0.413111	-0.0829315	lightcyan	FAM83E
ENSG00000111897	-0.629099	-0.184309	0.228172	0.755332	0.170674	-0.553845	0.184356	0.493982	0.795909	-0.193959	0.611465	0.397778	lightcyan	SERINC1
ENSG00000116741	0.110858	0.224285	-0.0828956	-0.197501	-0.364299	-0.0351331	0.0406865	0.101936	0.400701	-0.379499	-0.0111722	0.0918017	lightcyan	RGS2
ENSG00000116761	-0.190832	-0.235945	0.134514	0.406296	0.275286	0.0552208	0.496308	0.314561	0.948607	-0.0304469	0.0737573	-0.184907	lightcyan	CTH
ENSG00000124224	-0.523596	-0.349766	-0.252069	0.247293	-0.225197	-0.257776	0.239361	0.474808	0.841811	0.142136	0.45378	0.1215	lightcyan	PPP4R1L
ENSG00000128165	-0.566435	-0.466466	0.0511917	0.655828	0.361362	-0.206127	0.371638	0.421924	0.88064	0.290102	0.407286	-0.00148135	lightcyan	ADM2
ENSG00000130513	-0.717384	-0.289597	-0.00699822	0.655178	0.121492	-0.545486	0.174981	0.613812	0.870096	-0.0364254	0.7111	0.382802	lightcyan	GDF15
ENSG00000130755	-0.394968	-0.316958	0.0529614	0.535714	0.333057	-0.14878	0.237735	0.198932	0.816252	0.335229	0.257699	-0.0165944	lightcyan	GMFG
ENSG00000134757	-0.642168	-0.730061	-0.104075	0.591278	0.483844	-0.0146364	0.673989	0.784909	0.869991	0.278149	0.457508	-0.219027	lightcyan	DSG3
ENSG00000136155	-0.258989	-0.366888	0.145563	0.481018	0.405771	0.106167	0.640955	0.465881	0.950831	-0.032654	0.114118	-0.264379	lightcyan	SCEL
ENSG00000136943	-0.543123	-0.44382	0.134036	0.695682	0.404537	-0.181273	0.501654	0.547818	0.955653	0.0735851	0.403805	-0.021932	lightcyan	CTSV
ENSG00000137752	-0.0633567	-0.0592798	-0.0199375	0.129741	0.0316069	0.0418266	0.303343	0.228739	0.794737	-0.104188	0.0375256	-0.0953623	lightcyan	CASP1
ENSG00000140941	-0.448408	-0.261649	0.166814	0.65466	0.385358	-0.234232	0.381973	0.465851	0.964787	-0.0476463	0.378165	0.0745209	lightcyan	MAP1LC3B
ENSG00000147437	-0.406852	-0.146716	-0.0305027	0.347967	-0.144546	-0.308384	0.198126	0.360412	0.894216	-0.0779194	0.376978	0.198316	lightcyan	GNRH1
ENSG00000148841	-0.755425	-0.766666	-0.137885	0.601106	0.42608	-0.126867	0.616418	0.893912	0.670834	0.225739	0.60074	-0.103963	lightcyan	ITPRIP
ENSG00000149150	-0.571609	-0.0772647	0.102911	0.662033	0.176862	-0.583538	-0.0159052	0.351229	0.829541	-0.0349343	0.601769	0.458715	lightcyan	SLC43A1
ENSG00000151012	-0.245871	-0.318779	0.305041	0.615371	0.554134	0.0726837	0.649983	0.444402	0.916923	-0.124743	0.105807	-0.234221	lightcyan	SLC7A11
ENSG00000152689	-0.127344	0.150047	0.188906	0.357281	0.0720799	-0.255157	0.0574163	0.0831154	0.785858	-0.218057	0.161305	0.210412	lightcyan	RASGRP3
ENSG00000154153	-0.739602	-0.47223	-0.0844087	0.642426	0.195307	-0.395771	0.316212	0.645288	0.938006	0.169997	0.653168	0.193701	lightcyan	FAM134B
ENSG00000157036	-0.250184	0.00155632	-0.0454683	0.181146	-0.29912	-0.267712	0.0895193	0.191746	0.810364	-0.121778	0.249244	0.205333	lightcyan	EXOG
ENSG00000159450	-0.349127	-0.464747	0.120248	0.541483	0.516191	0.0989448	0.712182	0.623779	0.919462	-0.0381842	0.207188	-0.274215	lightcyan	TCHH
ENSG00000162496	-0.527946	-0.0570946	0.350329	0.808849	0.240674	-0.559001	0.110368	0.311355	0.848312	-0.19627	0.511942	0.414506	lightcyan	DHRS3
ENSG00000163536	-0.583766	-0.229119	0.0470295	0.617197	0.132446	-0.441481	0.196922	0.466599	0.956245	-0.00912693	0.55089	0.286442	lightcyan	SERPINI1
ENSG00000169435	-0.684233	-0.510219	-0.108179	0.622418	0.293653	-0.304567	0.275679	0.495419	0.887365	0.396018	0.553557	0.0942057	lightcyan	RASSF6
ENSG00000170381	-0.092703	0.212996	0.394908	0.447509	-0.0215173	-0.291332	0.096439	-0.015657	0.794293	-0.366345	0.0897827	0.236504	lightcyan	SEMA3E
ENSG00000170477	-0.433556	-0.549548	-0.171886	0.38052	0.303722	0.0531389	0.480577	0.450287	0.890054	0.415017	0.256441	-0.239545	lightcyan	KRT4
ENSG00000171124	-0.60062	-0.601139	0.0458452	0.666382	0.502839	-0.0836368	0.665758	0.781885	0.887106	0.0536866	0.456515	-0.131728	lightcyan	FUT3
ENSG00000171962	-0.551235	-0.452572	-0.271265	0.281033	-0.125892	-0.188863	0.328086	0.523372	0.879543	0.232086	0.444456	0.0283725	lightcyan	DRC3
ENSG00000174501	-0.745473	-0.230873	-0.0074871	0.667896	0.017631	-0.657516	0.00441944	0.455254	0.837245	0.0731108	0.736139	0.495253	lightcyan	ANKRD36C
ENSG00000178904	-0.0876232	0.118574	0.296785	0.430409	0.172118	-0.175552	0.175204	0.0704076	0.846575	-0.242492	0.0791265	0.112126	lightcyan	DPY19L3
ENSG00000179869	0.0887944	0.0545649	0.335182	0.317182	0.197869	0.099681	0.368653	-0.000252897	0.82125	-0.218029	-0.172312	-0.164428	lightcyan	ABCA13
ENSG00000180354	-0.503715	-0.194024	0.232146	0.739825	0.414075	-0.368476	0.302603	0.501737	0.899427	-0.159983	0.480271	0.21809	lightcyan	MTURN
ENSG00000182898	-0.377459	-0.30606	-0.0989883	0.301757	-0.0451471	-0.112832	0.364973	0.402072	0.93766	0.0757775	0.279506	-0.0235727	lightcyan	TCHHL1
ENSG00000184305	-0.00338901	-0.315426	-0.166562	-0.0130842	0.0779757	0.35391	0.496854	0.195593	0.76191	0.231355	-0.149743	-0.445286	lightcyan	CCSER1
ENSG00000186529	-0.507516	-0.123282	0.014326	0.52224	0.0392967	-0.455093	0.0792714	0.349003	0.919418	-0.00164056	0.503852	0.330699	lightcyan	CYP4F3
ENSG00000189367	-0.410508	-0.517912	-0.127535	0.358222	0.21442	0.0646355	0.588763	0.560104	0.957371	0.191241	0.252451	-0.241049	lightcyan	KIAA0408
ENSG00000196998	-0.677109	-0.495639	-0.166131	0.580415	0.355023	-0.295808	0.271257	0.586732	0.843055	0.342731	0.592998	0.105371	lightcyan	WDR45
ENSG00000197614	-0.508943	-0.685912	0.0116942	0.615033	0.666362	0.105223	0.721851	0.694015	0.81748	0.258397	0.311457	-0.32843	lightcyan	MFAP5
ENSG00000206344	-0.640582	-0.778567	-0.114802	0.556879	0.505929	0.0375418	0.748851	0.885535	0.758953	0.208128	0.460707	-0.266207	lightcyan	HCG27
ENSG00000213145	-0.575566	-0.715114	-0.34887	0.36132	0.38105	0.03596	0.444189	0.57569	0.728426	0.621189	0.396646	-0.239931	lightcyan	CRIP1
ENSG00000221676	-0.174891	0.290725	0.451384	0.569353	0.129428	-0.453403	0.02154	0.130328	0.712957	-0.54867	0.263796	0.417127	lightcyan	RNU6ATAC
ENSG00000224259	-0.229221	-0.35556	0.175531	0.487035	0.422109	0.126112	0.631983	0.405593	0.937973	-0.0048233	0.0710519	-0.285021	lightcyan	LINC01133
ENSG00000236217	-0.52578	-0.592722	0.0711723	0.685968	0.717468	-0.00531707	0.621782	0.674834	0.79084	0.187268	0.374213	-0.20424	lightcyan	C1DP2
ENSG00000237352	-0.19366	-0.170787	0.063995	0.313725	0.0947226	-0.0116097	0.409584	0.305116	0.938191	-0.0793129	0.112638	-0.0956852	lightcyan	LINC01358
ENSG00000241464	-0.211016	-0.180668	-0.00937953	0.26769	0.0298932	-0.0293334	0.342795	0.257644	0.929827	0.0242034	0.125667	-0.07785	lightcyan	RPL39P38
ENSG00000250342	0.106546	0.0403611	0.0511577	0.0316912	-0.043148	0.144884	0.303631	0.0673341	0.751161	-0.161527	-0.144648	-0.171444	lightcyan	SNRPCP16
ENSG00000262468	-0.659597	-0.545707	-0.183163	0.514406	0.185835	-0.22387	0.395403	0.613523	0.960484	0.301166	0.532184	0.0205608	lightcyan	LINC01569
ENSG00000276019	-0.306673	0.00339891	0.0441419	0.265029	-0.28787	-0.343363	0.105706	0.262926	0.721747	-0.251268	0.317592	0.276735	lightcyan	HULC
ENSG00000004799	-0.689441	-0.595068	0.114835	0.798973	0.762056	-0.237135	0.399805	0.68625	0.357622	0.204009	0.581069	0.0317976	grey60	PDK4
ENSG00000005243	-0.469042	-0.0771915	0.508467	0.938554	0.7381	-0.475138	0.117182	0.34713	0.408188	-0.22169	0.481502	0.347099	grey60	COPZ2
ENSG00000010278	-0.70439	-0.423096	0.174546	0.838221	0.539719	-0.44953	0.130987	0.411881	0.413156	0.268509	0.604965	0.251957	grey60	CD9
ENSG00000025039	-0.342631	-0.203954	0.410155	0.740931	0.519337	-0.157191	0.541838	0.515448	0.86693	-0.347718	0.274823	0.00877534	grey60	RRAGD
ENSG00000035862	-0.609191	0.00401183	0.402547	0.928089	0.369106	-0.735872	-0.102472	0.24958	0.625523	-0.143645	0.639242	0.599797	grey60	TIMP2
ENSG00000048052	-0.288333	-0.379532	0.38519	0.673295	0.617164	0.0772645	0.751051	0.582982	0.753496	-0.268882	0.147936	-0.244963	grey60	HDAC9
ENSG00000050344	-0.252185	-0.124838	0.652573	0.874269	0.809652	-0.17981	0.313112	0.188033	0.310664	-0.199298	0.163611	0.046119	grey60	NFE2L3
ENSG00000064225	-0.643521	-0.0714111	0.261311	0.840375	0.440978	-0.688651	-0.0637388	0.439398	0.495432	-0.15795	0.716631	0.568265	grey60	ST3GAL6
ENSG00000064687	-0.606444	-0.207482	0.126638	0.665054	0.47961	-0.506929	0.0594093	0.604586	0.214381	-0.159305	0.680799	0.404146	grey60	ABCA7
ENSG00000065320	-0.0895857	0.477532	0.8151	0.771977	0.395424	-0.593893	-0.281284	-0.218578	0.0686999	-0.566323	0.196319	0.588516	grey60	NTN1
ENSG00000065485	-0.487213	0.158106	0.487925	0.886105	0.449477	-0.746034	-0.237403	0.143589	0.339406	-0.25428	0.579698	0.661991	grey60	PDIA5
ENSG00000065600	-0.421847	-0.508908	0.0703065	0.466774	0.257873	-0.00560438	0.485757	0.406772	0.545904	0.195593	0.229972	-0.175386	grey60	TMEM206
ENSG00000073910	-0.341218	0.301267	0.63464	0.876637	0.379589	-0.697661	-0.170224	0.0601342	0.490802	-0.467225	0.438337	0.633439	grey60	FRY
ENSG00000079435	0.00719085	0.391808	0.768664	0.662376	0.574039	-0.366722	-0.0631702	-0.00606667	-0.0610432	-0.695586	0.11735	0.3823	grey60	LIPE
ENSG00000080031	-0.440857	-0.14125	0.574627	0.980553	0.759942	-0.380308	0.249091	0.318022	0.527536	-0.188967	0.387629	0.223998	grey60	PTPRH
ENSG00000091136	-0.419969	0.131584	0.482369	0.739576	0.17636	-0.666708	-0.222592	0.0141178	0.194578	-0.22397	0.451063	0.58537	grey60	LAMB1
ENSG00000099994	-0.466199	0.262113	0.459517	0.797682	0.179424	-0.847278	-0.436691	-0.071093	0.285861	-0.178531	0.558055	0.780398	grey60	SUSD2
ENSG00000099998	-0.691223	-0.434068	0.214844	0.902111	0.662855	-0.402698	0.242649	0.490493	0.580169	0.205966	0.591563	0.194943	grey60	GGT5
ENSG00000100156	-0.0206337	0.156297	0.785399	0.774513	0.68556	-0.132493	0.394768	0.196553	0.538579	-0.665766	0.020318	0.0646835	grey60	SLC16A8
ENSG00000100234	-0.641551	-0.282097	0.369501	0.970757	0.613336	-0.478352	0.258649	0.488044	0.713076	-0.0614408	0.580769	0.287436	grey60	TIMP3
ENSG00000100593	-0.155877	0.44989	0.707205	0.730708	0.398832	-0.630791	-0.273741	-0.0406018	0.0428337	-0.632931	0.315161	0.637417	grey60	ISM2
ENSG00000100731	-0.506831	0.0277487	0.554606	0.960784	0.579601	-0.641758	-0.0503873	0.244686	0.333458	-0.266938	0.545467	0.526182	grey60	PCNX
ENSG00000101203	-0.485982	-0.0918838	0.50241	0.882509	0.647126	-0.481885	0.161988	0.464098	0.258454	-0.375577	0.520986	0.368078	grey60	COL20A1
ENSG00000101336	-0.332567	-0.128062	0.463371	0.781004	0.494926	-0.227445	0.446568	0.404323	0.884842	-0.332945	0.270143	0.0827368	grey60	HCK
ENSG00000101443	-0.676736	-0.506202	-0.0740705	0.650179	0.426092	-0.328196	0.121084	0.357111	0.564024	0.546969	0.543716	0.126189	grey60	WFDC2
ENSG00000101680	-0.720733	-0.525235	0.202736	0.876655	0.691199	-0.336735	0.410746	0.720426	0.486644	0.0396259	0.6319	0.129324	grey60	LAMA1
ENSG00000102935	-0.0665086	0.224344	0.745351	0.720857	0.674003	-0.312061	-0.0201552	-0.0226504	-0.138774	-0.465093	0.116302	0.285744	grey60	ZNF423
ENSG00000102996	-0.325793	0.200298	0.586959	0.816474	0.486162	-0.618588	-0.277367	-0.0745293	0.0588746	-0.196674	0.381003	0.555062	grey60	MMP15
ENSG00000103249	-0.470575	0.132069	0.547457	0.882043	0.457524	-0.691182	-0.0928894	0.286454	0.282664	-0.453773	0.569765	0.611806	grey60	CLCN7
ENSG00000104365	-0.446255	-0.159894	0.0462902	0.534376	0.5189	-0.368578	-0.0588237	0.324826	0.211434	0.127722	0.489782	0.282772	grey60	IKBKB
ENSG00000105246	-0.686082	-0.499176	0.259322	0.908638	0.678455	-0.319508	0.437641	0.652102	0.613189	0.0410448	0.573228	0.103078	grey60	EBI3
ENSG00000105404	-0.778571	-0.478824	-0.020142	0.775336	0.568551	-0.45916	0.136297	0.586134	0.521486	0.318692	0.725382	0.265836	grey60	RABAC1
ENSG00000105499	-0.211031	-0.221699	0.496407	0.753105	0.748017	0.0185256	0.6228	0.429464	0.78595	-0.286857	0.10719	-0.165935	grey60	PLA2G4C
ENSG00000105767	-0.537786	0.0162923	0.455623	0.88905	0.333219	-0.680631	-0.124817	0.119972	0.483735	-0.103265	0.535747	0.549941	grey60	CADM4
ENSG00000106624	-0.513633	-0.51049	0.322858	0.796937	0.744221	-0.0932481	0.610929	0.678397	0.456345	-0.0978237	0.384765	-0.0993389	grey60	AEBP1
ENSG00000108244	-0.538844	0.0530988	0.478432	0.915902	0.522069	-0.706723	-0.148462	0.247369	0.279678	-0.238939	0.610135	0.604771	grey60	KRT23
ENSG00000108582	-0.372768	0.373646	0.557521	0.759517	0.13359	-0.842513	-0.440543	-0.0921662	0.169097	-0.385441	0.499688	0.808951	grey60	CPD
ENSG00000109736	-0.711183	-0.391634	0.271386	0.906494	0.648893	-0.465041	0.254799	0.627114	0.395691	-0.0359748	0.667977	0.28162	grey60	MFSD10
ENSG00000110628	-0.501465	-0.376868	0.36278	0.818891	0.567048	-0.1973	0.567894	0.612812	0.757498	-0.206101	0.392119	0.00891766	grey60	SLC22A18
ENSG00000111859	-0.484314	-0.0507045	0.469583	0.916756	0.517683	-0.504817	0.171674	0.343208	0.78178	-0.254766	0.477514	0.360995	grey60	NEDD9
ENSG00000115652	-0.306491	0.235228	0.686847	0.910806	0.532814	-0.608631	-0.155417	-0.0246391	0.327416	-0.33251	0.356539	0.531631	grey60	UXS1
ENSG00000115902	-0.439226	0.22474	0.539299	0.853456	0.245211	-0.768464	-0.283928	-0.021786	0.40808	-0.249541	0.498498	0.683741	grey60	SLC1A4
ENSG00000117298	-0.339705	0.21085	0.705152	0.907642	0.47175	-0.622919	-0.086991	0.0867179	0.279828	-0.466197	0.397931	0.546287	grey60	ECE1
ENSG00000122861	-0.552527	-0.56526	0.273726	0.836449	0.840203	-0.0815171	0.618383	0.692031	0.551769	0.0273431	0.409883	-0.128916	grey60	PLAU
ENSG00000124145	-0.392604	-0.354822	0.432493	0.763844	0.597741	-0.097092	0.593902	0.543752	0.565552	-0.251924	0.271282	-0.0730267	grey60	SDC4
ENSG00000124467	-0.170543	0.0805023	0.745405	0.898912	0.728884	-0.25697	0.285001	0.142802	0.59299	-0.425365	0.138546	0.149682	grey60	PSG8
ENSG00000125122	-0.513519	-0.137265	0.223407	0.690291	0.583801	-0.470628	0.0139596	0.471064	0.132943	-0.147199	0.584736	0.380208	grey60	LRRC29
ENSG00000127129	-0.0531179	-0.0355933	0.493915	0.539639	0.4715	-0.0575727	0.108085	-0.185904	0.140579	0.0567227	-0.070153	-0.0321756	grey60	EDN2
ENSG00000128159	-0.67003	-0.0677008	0.375548	0.897195	0.340509	-0.747809	-0.0742354	0.378614	0.39118	-0.213811	0.711771	0.615832	grey60	TUBGCP6
ENSG00000129003	-0.889773	-0.37834	0.040779	0.844262	0.365322	-0.706321	-0.0129665	0.584162	0.473906	0.169837	0.881392	0.520188	grey60	VPS13C
ENSG00000130023	-0.632164	-0.329187	-0.20092	0.497072	0.290126	-0.424138	-0.0373003	0.399232	0.563955	0.393924	0.619826	0.285127	grey60	ERMARD
ENSG00000130052	-0.219178	0.397066	0.687476	0.785991	0.439702	-0.658549	-0.278435	-0.0294444	0.0911737	-0.541961	0.36095	0.644871	grey60	STARD8
ENSG00000130433	-0.37498	0.0384785	0.544378	0.902403	0.570579	-0.465892	0.113643	0.19999	0.706348	-0.254733	0.371955	0.34205	grey60	CACNG6
ENSG00000130487	-0.499155	-0.511579	0.251652	0.802856	0.733663	-0.0651181	0.594458	0.55963	0.795092	0.108163	0.332636	-0.149982	grey60	KLHDC7B
ENSG00000133624	-0.105511	-0.2229	0.62529	0.703179	0.786789	0.10837	0.587887	0.29228	0.281797	-0.301219	-0.0277837	-0.234284	grey60	ZNF767P
ENSG00000134247	-0.639216	-0.548622	0.220177	0.85161	0.758461	-0.196306	0.567655	0.768094	0.624243	-0.014534	0.530928	-0.0139068	grey60	PTGFRN
ENSG00000134294	-0.644652	-0.30456	0.304043	0.864307	0.406406	-0.456273	0.323814	0.558648	0.751176	-0.145527	0.580036	0.269986	grey60	SLC38A2
ENSG00000134363	-0.221243	-0.0271946	0.740906	0.915461	0.820406	-0.21598	0.371811	0.280589	0.420278	-0.452129	0.181916	0.0997086	grey60	FST
ENSG00000135048	-0.283742	0.0449457	0.654863	0.850174	0.46288	-0.386598	0.153553	0.0860668	0.50759	-0.313101	0.233387	0.268483	grey60	TMEM2
ENSG00000135842	-0.376928	0.111888	0.51987	0.825999	0.281801	-0.557947	-0.00981996	0.0648611	0.714736	-0.241692	0.368674	0.443178	grey60	FAM129A
ENSG00000136026	-0.67491	-0.54016	0.174868	0.818454	0.655896	-0.288431	0.331121	0.548614	0.382921	0.227877	0.545211	0.0794716	grey60	CKAP4
ENSG00000136235	-0.828904	-0.410605	0.121025	0.889421	0.423687	-0.58158	0.196938	0.63268	0.728988	0.0861844	0.777365	0.374143	grey60	GPNMB
ENSG00000137193	-0.766255	-0.409252	0.208012	0.91776	0.560304	-0.524282	0.169694	0.526564	0.523287	0.144452	0.693807	0.320695	grey60	PIM1
ENSG00000137440	-0.514376	-0.4454	0.124243	0.64374	0.375542	-0.188788	0.302543	0.296515	0.623397	0.322647	0.339153	-0.00805714	grey60	FGFBP1
ENSG00000137628	-0.370455	-0.392472	0.38059	0.679335	0.648954	-0.0570804	0.49332	0.484875	0.18564	-0.132725	0.252326	-0.0937717	grey60	DDX60
ENSG00000138639	-0.209618	0.199171	0.76646	0.913629	0.619231	-0.447861	0.0175281	-0.0218101	0.399771	-0.379688	0.215377	0.361382	grey60	ARHGAP24
ENSG00000138760	-0.41696	0.252937	0.572699	0.830637	0.225418	-0.771942	-0.286169	-0.0012049	0.284882	-0.347226	0.494831	0.702737	grey60	SCARB2
ENSG00000140465	-0.502569	-0.122252	0.486131	0.961016	0.724436	-0.468013	0.162283	0.368463	0.533299	-0.174859	0.491922	0.321274	grey60	CYP1A1
ENSG00000140545	-0.675535	-0.368888	0.331693	0.961739	0.683106	-0.443099	0.273397	0.534544	0.552537	0.0117131	0.602041	0.245648	grey60	MFGE8
ENSG00000140678	-0.523764	-0.123465	0.426381	0.880226	0.53448	-0.470408	0.279884	0.547208	0.68009	-0.380985	0.539657	0.331712	grey60	ITGAX
ENSG00000141622	-0.288105	0.12467	0.529379	0.753081	0.651272	-0.467711	-0.0841073	0.176717	0.0166565	-0.340405	0.37683	0.418806	grey60	RNF165
ENSG00000142156	-0.448844	-0.162886	0.333642	0.627816	0.378088	-0.374402	0.205818	0.517799	0.0837699	-0.378081	0.473615	0.282054	grey60	COL6A1
ENSG00000145362	-0.683358	-0.356061	0.250698	0.922468	0.601336	-0.449029	0.286119	0.558258	0.773564	0.0278956	0.617526	0.249502	grey60	ANK2
ENSG00000146021	-0.269154	0.250781	0.643871	0.813875	0.574686	-0.571046	-0.151713	0.0945627	0.0810747	-0.465639	0.378296	0.531709	grey60	KLHL3
ENSG00000146842	-0.203742	-0.173115	0.441498	0.568507	0.331612	-0.07642	0.374282	0.17823	0.395822	-0.177275	0.0771222	-0.0461452	grey60	TMEM209
ENSG00000147364	-0.34571	-0.0339353	0.513548	0.859431	0.578981	-0.346088	0.268073	0.286101	0.806532	-0.277326	0.316014	0.212238	grey60	FBXO25
ENSG00000148346	-0.460139	-0.442734	0.284185	0.790448	0.662448	-0.0918156	0.530711	0.453137	0.811845	0.108527	0.293174	-0.115046	grey60	LCN2
ENSG00000148450	-0.713997	-0.678432	-0.208121	0.581488	0.587948	-0.189731	0.270894	0.598757	0.419083	0.574795	0.586245	-0.0154003	grey60	MSRB2
ENSG00000149218	-0.216345	0.260416	0.707753	0.850661	0.494329	-0.533362	-0.164999	-0.151223	0.289862	-0.282333	0.239412	0.463726	grey60	ENDOD1
ENSG00000150556	-0.111668	-0.0804848	0.584167	0.750804	0.735618	-0.0415468	0.334379	0.0341884	0.551574	-0.0789476	-0.00836896	-0.0853271	grey60	LYPD6B
ENSG00000154265	-0.646545	-0.00780438	0.314727	0.856236	0.344928	-0.755746	-0.0860756	0.429029	0.521531	-0.268983	0.734675	0.642087	grey60	ABCA5
ENSG00000154645	-0.293513	0.0735839	0.459695	0.733857	0.576958	-0.453286	-0.208419	-0.085212	0.0752666	0.0322713	0.300614	0.375046	grey60	CHODL
ENSG00000155465	-0.556327	-0.211	0.0821313	0.66715	0.326125	-0.477345	-0.105812	0.115818	0.558081	0.381366	0.491216	0.324483	grey60	SLC7A7
ENSG00000156453	-0.584892	-0.512044	0.244686	0.820508	0.621968	-0.164696	0.606106	0.684059	0.805535	-0.0287695	0.445826	-0.050898	grey60	PCDH1
ENSG00000157379	-0.495816	0.0593285	0.329005	0.783272	0.486715	-0.65651	-0.2242	0.19431	0.276638	-0.0978879	0.581265	0.572574	grey60	DHRS1
ENSG00000159433	-0.211702	0.0934151	0.721208	0.902237	0.793359	-0.338502	0.120447	0.100791	0.302794	-0.345158	0.212184	0.247167	grey60	STARD9
ENSG00000160190	-0.436174	-0.151608	0.573889	0.917225	0.604748	-0.357598	0.354151	0.423233	0.549934	-0.358736	0.385272	0.206652	grey60	SLC37A1
ENSG00000160200	-0.344669	0.0995481	0.522277	0.817106	0.338262	-0.487342	0.105326	0.162983	0.811308	-0.333891	0.344381	0.374519	grey60	CBS
ENSG00000160255	-0.476195	0.0698592	0.546877	0.93077	0.424178	-0.651188	-0.0884277	0.105182	0.50814	-0.192805	0.483123	0.528111	grey60	ITGB2
ENSG00000162772	-0.376685	-0.381502	0.346005	0.734974	0.648243	-0.022371	0.693486	0.634803	0.824516	-0.237963	0.261152	-0.153184	grey60	ATF3
ENSG00000163121	-0.441767	0.13596	0.586545	0.948404	0.505	-0.664584	-0.105802	0.126393	0.482908	-0.286671	0.488241	0.560038	grey60	NEURL3
ENSG00000163347	-0.207356	-0.354157	0.436715	0.692319	0.755121	0.153547	0.765822	0.509995	0.761568	-0.231802	0.0576372	-0.317369	grey60	CLDN1
ENSG00000163703	-0.92218	-0.685943	-0.157996	0.722946	0.433991	-0.433856	0.27354	0.796419	0.493089	0.360139	0.827895	0.207642	grey60	CRELD1
ENSG00000163803	-0.453466	-0.231072	0.453305	0.841444	0.784389	-0.306749	0.288428	0.503858	0.18308	-0.246123	0.438622	0.17718	grey60	PLB1
ENSG00000163898	-0.357216	-0.436713	0.309917	0.73275	0.759153	0.052128	0.69656	0.582166	0.817399	-0.0758633	0.212712	-0.238396	grey60	LIPH
ENSG00000164176	-0.44263	-0.0228323	0.423203	0.81726	0.423827	-0.536171	-0.124599	-0.000760433	0.387346	0.0725713	0.401844	0.407875	grey60	EDIL3
ENSG00000164181	-0.253417	0.267683	0.71203	0.82942	0.335447	-0.581745	-0.118103	-0.0612535	0.326015	-0.432972	0.288033	0.513937	grey60	ELOVL7
ENSG00000165915	-0.624856	0.0412612	0.3495	0.839808	0.356554	-0.798234	-0.215078	0.336128	0.249627	-0.252334	0.73167	0.705534	grey60	SLC39A13
ENSG00000166145	-0.749267	-0.460233	0.169818	0.887196	0.627288	-0.4549	0.193431	0.531543	0.460911	0.220225	0.663602	0.249683	grey60	SPINT1
ENSG00000167165	-0.650173	-0.352369	0.243079	0.865505	0.725222	-0.419794	0.233101	0.608249	0.393728	-0.0221893	0.630843	0.25419	grey60	UGT1A6
ENSG00000167393	-0.267264	-0.103899	0.612004	0.886825	0.823392	-0.179596	0.430315	0.364765	0.618943	-0.351556	0.21855	0.0466317	grey60	PPP2R3B
ENSG00000167525	-0.827987	-0.248388	0.128284	0.831399	0.312787	-0.753315	-0.0433134	0.581811	0.41907	-0.0475569	0.870088	0.599449	grey60	PROCA1
ENSG00000167702	-0.713747	-0.387514	0.166151	0.833908	0.65847	-0.470566	0.172084	0.629329	0.314236	0.0408411	0.700558	0.303937	grey60	KIFC2
ENSG00000169418	-0.582994	0.114603	0.441127	0.898679	0.339582	-0.827142	-0.266285	0.178767	0.355877	-0.219136	0.667427	0.728139	grey60	NPR1
ENSG00000170370	-0.377234	0.0996766	0.6121	0.910243	0.630905	-0.531192	0.0669681	0.297245	0.399337	-0.464132	0.44323	0.441769	grey60	EMX2
ENSG00000171401	-0.467856	-0.252669	0.101583	0.634412	0.398731	-0.317834	0.0442602	0.131984	0.639844	0.370362	0.369004	0.159747	grey60	KRT13
ENSG00000171903	-0.583197	-0.0739222	0.367215	0.86497	0.292688	-0.610141	0.102886	0.37126	0.800465	-0.223731	0.580401	0.460961	grey60	CYP4F11
ENSG00000173402	-0.292434	0.449165	0.609508	0.746161	0.120147	-0.817117	-0.453323	-0.183819	0.225094	-0.417737	0.419661	0.794793	grey60	DAG1
ENSG00000174125	-0.424928	-0.0625356	0.501082	0.904614	0.590225	-0.41468	0.254439	0.362523	0.777129	-0.294059	0.408985	0.27369	grey60	TLR1
ENSG00000174808	-0.0475008	0.178104	0.819936	0.833526	0.638038	-0.208812	0.272499	0.0174506	0.558898	-0.508532	0.0122576	0.124234	grey60	BTC
ENSG00000177628	-0.395063	-0.241732	0.562787	0.904919	0.704776	-0.217997	0.464438	0.421064	0.575932	-0.259431	0.295485	0.0500983	grey60	GBA
ENSG00000179750	-0.422416	-0.357444	0.455217	0.897531	0.838659	-0.12409	0.54815	0.504061	0.678931	-0.111823	0.301395	-0.0636849	grey60	APOBEC3B
ENSG00000180422	-0.88908	-0.453935	0.0323483	0.829395	0.357691	-0.618075	0.155532	0.706789	0.576617	0.0977346	0.857287	0.418175	grey60	LINC00304
ENSG00000181982	-0.16504	0.120161	0.705732	0.796634	0.759338	-0.30539	0.134824	0.19586	0.0620861	-0.512971	0.213067	0.250621	grey60	CCDC149
ENSG00000183317	0.0703753	0.165466	0.81783	0.738634	0.796955	-0.0354373	0.401507	0.140331	0.386132	-0.646067	-0.0743676	-0.01727	grey60	EPHA10
ENSG00000183668	-0.402453	-0.059387	0.580766	0.961652	0.728721	-0.414773	0.162755	0.231727	0.54071	-0.185861	0.369333	0.274017	grey60	PSG9
ENSG00000183760	-0.368143	-0.317505	0.492581	0.838309	0.6964	-0.119512	0.485039	0.357113	0.560399	-0.0898361	0.222148	-0.0594991	grey60	ACP7
ENSG00000184613	-0.542048	-0.273294	0.30132	0.87371	0.670401	-0.370168	0.202135	0.353332	0.658622	0.110828	0.468258	0.193202	grey60	NELL2
ENSG00000184908	-0.409332	0.288652	0.529885	0.773266	0.156505	-0.807106	-0.389233	-0.0658154	0.184241	-0.302547	0.502858	0.753203	grey60	CLCNKB
ENSG00000185164	-0.654462	-0.606523	0.161089	0.809845	0.629516	-0.172027	0.556446	0.669779	0.699654	0.153436	0.489265	-0.0596329	grey60	NOMO2
ENSG00000185442	-0.192852	-0.33029	0.422375	0.623841	0.595655	0.0974199	0.52708	0.212452	0.469417	0.0156652	0.00127995	-0.256071	grey60	FAM174B
ENSG00000185585	-0.251649	0.485517	0.62757	0.716265	0.151998	-0.808	-0.496408	-0.208049	0.0718174	-0.449881	0.399737	0.805228	grey60	OLFML2A
ENSG00000185818	-0.154052	-0.186605	0.621106	0.71737	0.7084	0.00714926	0.501155	0.277082	0.251693	-0.316499	0.0403302	-0.129084	grey60	NAT8L
ENSG00000185950	-0.113828	-0.025963	0.732756	0.820537	0.782641	-0.0681611	0.523112	0.3241	0.540207	-0.552033	0.0634128	-0.0383466	grey60	IRS2
ENSG00000186212	-0.0112932	0.466003	0.740697	0.703806	0.496973	-0.453215	-0.147779	-0.114882	0.26399	-0.602573	0.134624	0.457218	grey60	SOWAHB
ENSG00000188092	-0.652209	-0.21913	0.377032	0.93939	0.464617	-0.553238	0.220593	0.504698	0.703162	-0.184908	0.619917	0.377227	grey60	GPR89B
ENSG00000189143	-0.946353	-0.53167	-0.116895	0.748801	0.318571	-0.617774	0.0994911	0.737348	0.475914	0.245386	0.915194	0.417118	grey60	CLDN4
ENSG00000189283	-0.24093	0.0462536	0.505943	0.676173	0.660944	-0.312808	0.138457	0.3598	0.0476652	-0.487865	0.321784	0.265935	grey60	FHIT
ENSG00000196668	-0.69174	-0.256799	0.0447141	0.719767	0.281768	-0.604501	-0.161613	0.201044	0.494667	0.390711	0.641118	0.439303	grey60	LINC00173
ENSG00000198756	-0.108046	0.318156	0.819282	0.867659	0.566287	-0.435651	-0.0104135	-0.0993161	0.428048	-0.488249	0.13859	0.37599	grey60	COLGALT2
ENSG00000198768	-0.203051	0.434723	0.746593	0.803322	0.368125	-0.675435	-0.252964	-0.0489706	0.163932	-0.623979	0.338458	0.660383	grey60	APCDD1L
ENSG00000204099	-0.132013	0.546502	0.711611	0.682449	0.241037	-0.712928	-0.425814	-0.189172	-0.0254811	-0.614074	0.303864	0.737785	grey60	NEU4
ENSG00000204542	-0.243697	-0.29059	0.45142	0.762089	0.767749	0.0154165	0.499535	0.250363	0.666988	0.0201395	0.0834286	-0.18437	grey60	C6orf15
ENSG00000204941	-0.305535	0.0916351	0.739208	0.954116	0.664536	-0.444361	0.161511	0.21581	0.422159	-0.485091	0.31791	0.340933	grey60	PSG5
ENSG00000226002	-0.542877	-0.0118215	0.377327	0.812618	0.17864	-0.645095	-0.0344229	0.194612	0.66992	-0.146933	0.53146	0.509305	grey60	GTF2IP14
ENSG00000230183	-0.627674	0.00959009	0.300104	0.785185	0.320905	-0.763623	-0.161386	0.419291	0.236856	-0.296948	0.742012	0.675629	grey60	CNOT6LP1
ENSG00000231925	-0.217626	0.413619	0.74787	0.818551	0.335344	-0.683544	-0.279807	-0.123693	0.183961	-0.527443	0.322083	0.654698	grey60	TAPBP
ENSG00000235316	-0.31247	0.206712	0.614411	0.854955	0.603827	-0.575458	-0.126758	0.112249	0.215814	-0.388707	0.403516	0.516162	grey60	DUSP8P5
ENSG00000243406	-0.462635	0.0996693	0.521827	0.871071	0.274794	-0.645751	-0.00513349	0.197053	0.670312	-0.350825	0.487052	0.530744	grey60	MRPS31P5
ENSG00000248905	-0.259768	0.311634	0.701324	0.868508	0.438861	-0.600199	-0.063334	0.0790765	0.50775	-0.564526	0.348728	0.541653	grey60	FMN1
ENSG00000259803	-0.697778	-0.282769	0.24583	0.894223	0.595312	-0.538417	0.187021	0.620562	0.55978	-0.105527	0.704324	0.373421	grey60	SLC22A31
ENSG00000261040	-0.404565	-0.412272	0.257396	0.746314	0.804379	-0.0684606	0.385758	0.343719	0.529719	0.238589	0.261467	-0.112383	grey60	WFDC21P
ENSG00000265107	-0.421113	-0.227759	0.559696	0.938161	0.767517	-0.251672	0.469142	0.498544	0.606964	-0.31871	0.352617	0.0879873	grey60	GJA5
ENSG00000272523	-0.624394	-0.521531	0.0322666	0.657798	0.374975	-0.250345	0.267825	0.376751	0.591782	0.410522	0.4543	0.04016	grey60	LINC01023
ENSG00000280237	-0.617466	-0.141228	0.245703	0.765588	0.446068	-0.580456	0.085664	0.598585	0.368532	-0.293659	0.693647	0.469198	grey60	MIR4697HG
ENSG00000047634	-0.882224	-0.275738	-0.331695	0.420735	-0.157787	-0.808665	-0.324087	0.53625	0.202563	0.226387	0.971545	0.700523	greenyellow	SCML1
ENSG00000058668	-0.835156	-0.221957	0.0204284	0.729151	0.223647	-0.794753	-0.170816	0.551669	0.283009	0.0132852	0.910052	0.663891	greenyellow	ATP2B4
ENSG00000059804	-0.907513	-0.537122	-0.359351	0.463589	0.0828182	-0.59703	-0.141288	0.569722	0.108341	0.502634	0.886468	0.436059	greenyellow	SLC2A3
ENSG00000068697	-0.914649	-0.41337	-0.142096	0.706097	0.117129	-0.705724	-0.0708247	0.513783	0.628327	0.352574	0.878953	0.512214	greenyellow	LAPTM4A
ENSG00000085117	-0.843299	-0.25354	-0.230484	0.459468	-0.0988894	-0.787006	-0.288393	0.527587	0.118093	0.136926	0.930065	0.683105	greenyellow	CD82
ENSG00000086730	-0.817316	-0.398919	-0.0696656	0.664228	0.319628	-0.572153	0.122144	0.777748	0.416388	-0.00298342	0.852683	0.420106	greenyellow	LAT2
ENSG00000089356	-0.887123	-0.546482	-0.654793	0.16891	-0.195218	-0.546759	-0.178623	0.653693	0.130253	0.537278	0.910562	0.421956	greenyellow	FXYD3
ENSG00000095397	-0.5807	-0.0139008	0.110642	0.566432	0.168344	-0.667864	-0.122842	0.51109	0.231106	-0.312518	0.721347	0.607264	greenyellow	DFNB31
ENSG00000100284	-0.796976	-0.141213	-0.283235	0.443871	-0.0997392	-0.844917	-0.496773	0.295929	0.237418	0.344686	0.896117	0.752314	greenyellow	TOM1
ENSG00000100968	-0.800573	-0.196262	-0.276828	0.405587	-0.0855279	-0.780796	-0.334716	0.519383	0.133638	0.125632	0.92321	0.698375	greenyellow	NFATC4
ENSG00000108799	-0.91908	-0.423108	-0.150695	0.656097	0.154616	-0.687234	0.0113047	0.733993	0.433712	0.117371	0.943475	0.521445	greenyellow	EZH1
ENSG00000110455	-0.91905	-0.378746	-0.300647	0.482834	-0.113124	-0.751912	-0.189606	0.596042	0.291129	0.251473	0.957045	0.611001	greenyellow	ACCS
ENSG00000110651	-0.955641	-0.487379	-0.324215	0.52975	0.0320367	-0.695964	-0.15393	0.603718	0.254315	0.411981	0.955056	0.530409	greenyellow	CD81
ENSG00000112655	-0.905828	-0.318803	-0.259415	0.530039	-0.0495843	-0.811463	-0.341235	0.433309	0.201508	0.370383	0.945216	0.674922	greenyellow	PTK7
ENSG00000113140	-0.886982	-0.325958	-0.00876509	0.781563	0.22524	-0.768531	-0.152822	0.462047	0.423494	0.252414	0.884273	0.594135	greenyellow	SPARC
ENSG00000114378	-0.887938	-0.297201	-0.354136	0.465488	-0.147544	-0.779725	-0.25958	0.511827	0.538724	0.31824	0.942581	0.644368	greenyellow	HYAL1
ENSG00000116661	-0.812631	-0.172905	-0.110297	0.631539	0.0850175	-0.837322	-0.4092	0.275717	0.304987	0.335003	0.867138	0.711417	greenyellow	FBXO2
ENSG00000117385	-0.92153	-0.346854	-0.283768	0.539434	-0.102575	-0.796644	-0.289481	0.430694	0.399828	0.415538	0.932864	0.641192	greenyellow	P3H1
ENSG00000119655	-0.848178	-0.208199	-0.416465	0.315064	-0.302398	-0.84438	-0.479704	0.39017	0.167897	0.337626	0.948881	0.75598	greenyellow	NPC2
ENSG00000119899	-0.780657	-0.287499	-0.139793	0.619875	0.0455534	-0.661339	-0.134971	0.348955	0.735191	0.362141	0.75451	0.493463	greenyellow	SLC17A5
ENSG00000119915	-0.775959	-0.274216	-0.330325	0.415261	-0.18492	-0.656311	-0.162176	0.436896	0.731468	0.314985	0.794982	0.519144	greenyellow	ELOVL3
ENSG00000121310	-0.956192	-0.51624	-0.46133	0.446366	0.0156306	-0.648077	-0.119152	0.684447	0.390671	0.453972	0.972562	0.487109	greenyellow	ECHDC2
ENSG00000125046	-0.717402	-0.424894	-0.312931	0.26345	-0.0747803	-0.456296	0.00189968	0.665051	-0.000949964	0.117173	0.747063	0.35458	greenyellow	SSUH2
ENSG00000126432	-0.745619	-0.368057	-0.418597	0.359201	0.0660345	-0.548451	-0.261205	0.361571	0.342614	0.593803	0.754583	0.420952	greenyellow	PRDX5
ENSG00000134569	-0.960898	-0.482777	-0.434606	0.439315	-0.0876395	-0.708913	-0.225894	0.559945	0.280895	0.50615	0.96434	0.550217	greenyellow	LRP4
ENSG00000135144	-0.587392	-0.272456	-0.221695	0.423064	0.169173	-0.460237	-0.248131	0.133347	0.373064	0.592489	0.55324	0.334084	greenyellow	DTX1
ENSG00000135643	-0.891375	-0.392481	-0.0933748	0.749482	0.268661	-0.674496	0.0249052	0.653236	0.66272	0.186136	0.895516	0.49184	greenyellow	KCNMB4
ENSG00000139636	-0.84012	-0.547548	-0.496885	0.293435	0.0245986	-0.460582	0.0445141	0.809399	0.273047	0.304076	0.868368	0.327319	greenyellow	LMBR1L
ENSG00000142046	-0.890368	-0.51839	-0.52859	0.279686	-0.133579	-0.560159	-0.0495337	0.75864	0.293602	0.331553	0.922152	0.425975	greenyellow	TMEM91
ENSG00000142102	-0.891063	-0.370575	-0.0958867	0.698873	0.246119	-0.703505	-0.0267829	0.69719	0.406848	0.0949588	0.933367	0.546365	greenyellow	ATHL1
ENSG00000146242	-0.848663	-0.393904	-0.219016	0.526885	0.119073	-0.623825	0.00351725	0.756433	0.326798	0.0702925	0.904975	0.489072	greenyellow	TPBG
ENSG00000150593	-0.815143	-0.0919245	-0.213894	0.49891	-0.184872	-0.905167	-0.44582	0.338899	0.412426	0.192373	0.921767	0.806921	greenyellow	PDCD4
ENSG00000155085	-0.860135	-0.54634	-0.444042	0.391867	0.0689204	-0.536177	-0.203444	0.43457	0.153746	0.707232	0.811947	0.374008	greenyellow	AK9
ENSG00000158104	-0.818011	-0.449388	-0.547162	0.243446	-0.301779	-0.568169	-0.234152	0.357956	0.475894	0.66884	0.773572	0.41817	greenyellow	HPD
ENSG00000158106	-0.791544	-0.247749	-0.183145	0.48511	0.0122215	-0.701941	-0.128199	0.650812	0.274849	-0.0180821	0.891569	0.599857	greenyellow	RHPN1
ENSG00000158825	-0.944484	-0.571366	-0.46828	0.465936	0.0561629	-0.57243	-0.0256628	0.683483	0.56002	0.523744	0.920568	0.389571	greenyellow	CDA
ENSG00000162694	-0.80785	-0.231659	-0.270824	0.445682	-0.261885	-0.774221	-0.350363	0.264345	0.477291	0.401551	0.81731	0.640431	greenyellow	EXTL2
ENSG00000162729	-0.897846	-0.285983	-0.286265	0.479718	-0.129422	-0.830993	-0.361553	0.451735	0.186939	0.311459	0.959191	0.70836	greenyellow	IGSF8
ENSG00000162881	-0.890881	-0.46978	-0.456843	0.348087	-0.152158	-0.601407	-0.0257662	0.745662	0.459819	0.257548	0.921272	0.459364	greenyellow	OXER1
ENSG00000163517	-0.902647	-0.37673	-0.274511	0.59059	0.0905433	-0.714243	-0.142841	0.572932	0.569144	0.342546	0.927381	0.552655	greenyellow	HDAC11
ENSG00000165171	-0.931814	-0.346759	-0.304468	0.544011	-0.0677538	-0.805777	-0.305128	0.446432	0.403972	0.43182	0.954251	0.65206	greenyellow	WBSCR27
ENSG00000165507	-0.888797	-0.29729	-0.0922176	0.681671	0.115715	-0.77327	-0.0900954	0.645916	0.477841	0.0507493	0.946291	0.624799	greenyellow	C10orf10
ENSG00000167107	-0.893218	-0.359776	-0.190393	0.63393	0.125296	-0.70869	-0.0471912	0.674662	0.57914	0.155809	0.934279	0.550763	greenyellow	ACSF2
ENSG00000167608	-0.906717	-0.31909	-0.188719	0.581613	0.0132763	-0.794659	-0.21256	0.579209	0.257765	0.175287	0.964794	0.658225	greenyellow	TMC4
ENSG00000169885	-0.711381	-0.346672	-0.474876	0.246944	-0.117506	-0.55543	-0.39889	0.174109	0.200529	0.74289	0.694685	0.437992	greenyellow	CALML6
ENSG00000170412	-0.892874	-0.509614	-0.525723	0.311529	-0.198327	-0.608789	-0.240455	0.434122	0.30399	0.671642	0.853774	0.450402	greenyellow	GPRC5C
ENSG00000176809	-0.871755	-0.407816	-0.451491	0.305256	-0.197064	-0.652914	-0.146924	0.678363	0.255043	0.243442	0.930753	0.535269	greenyellow	LRRC37A3
ENSG00000177169	-0.855146	-0.184195	-0.131052	0.616534	0.0464932	-0.856903	-0.306558	0.490753	0.338423	0.122091	0.952652	0.73994	greenyellow	ULK1
ENSG00000178093	-0.429592	-0.318972	-0.865517	-0.404707	-0.47979	-0.224917	-0.3857	0.228894	-0.19012	0.676524	0.484252	0.21838	greenyellow	TSSK6
ENSG00000178934	-0.511429	-0.36698	-0.710925	-0.261883	-0.649982	-0.297872	-0.296821	0.174678	-0.021674	0.639478	0.480166	0.239889	greenyellow	LGALS7B
ENSG00000181085	-0.591745	-0.0820543	-0.0540852	0.378271	-0.0177131	-0.630203	-0.174843	0.520038	0.00289965	-0.219841	0.728866	0.585275	greenyellow	MAPK15
ENSG00000182700	-0.898705	-0.425633	-0.429312	0.363696	-0.151978	-0.701782	-0.306012	0.46733	0.116475	0.500249	0.913589	0.567042	greenyellow	IGIP
ENSG00000183506	-0.9095	-0.374552	-0.387281	0.412098	-0.100524	-0.73852	-0.23032	0.625389	0.232039	0.279491	0.977168	0.614631	greenyellow	PI4KAP2
ENSG00000185033	-0.821531	-0.334576	-0.310503	0.386069	-0.034694	-0.669139	-0.183406	0.637278	0.0872047	0.147889	0.905499	0.567534	greenyellow	SEMA4B
ENSG00000185262	-0.899646	-0.376864	-0.204742	0.623162	0.0371592	-0.699946	-0.0168503	0.65244	0.698551	0.184334	0.914372	0.529478	greenyellow	UBALD2
ENSG00000187045	-0.87252	-0.200594	-0.0766526	0.652231	0.0114387	-0.866077	-0.258552	0.508703	0.347011	0.066659	0.952236	0.73861	greenyellow	TMPRSS6
ENSG00000189334	-0.813019	-0.426128	-0.70296	0.0846255	-0.293804	-0.581256	-0.354379	0.457027	0.150313	0.639353	0.856031	0.481959	greenyellow	S100A14
ENSG00000196074	-0.893344	-0.520853	-0.286112	0.565612	0.0125	-0.569377	0.0320239	0.553237	0.702081	0.459821	0.816383	0.366682	greenyellow	SYCP2
ENSG00000196476	-0.891982	-0.514737	-0.684082	0.176953	-0.268256	-0.58887	-0.263241	0.518356	0.292347	0.677701	0.894102	0.452975	greenyellow	C20orf96
ENSG00000198520	-0.629786	-0.215599	-0.321754	0.293752	-0.25493	-0.524159	-0.0790532	0.402715	0.788337	0.212709	0.648491	0.411235	greenyellow	C1orf228
ENSG00000198799	-0.692349	-0.272289	-0.214987	0.371128	-0.21682	-0.54229	0.0659649	0.612975	0.648026	-0.0357906	0.721888	0.42313	greenyellow	LRIG2
ENSG00000204789	-0.812602	-0.286759	-0.453272	0.304897	-0.143614	-0.733967	-0.482889	0.306587	0.0817869	0.558081	0.871754	0.634073	greenyellow	ZNF204P
ENSG00000205464	-0.846644	-0.392305	-0.210271	0.523967	0.15596	-0.658052	-0.174537	0.573737	0.0265649	0.262819	0.886001	0.528329	greenyellow	ATP6AP1L
ENSG00000213199	-0.882121	-0.367333	-0.0305231	0.760772	0.290756	-0.689854	0.0369496	0.704764	0.516795	0.0519887	0.910289	0.521205	greenyellow	ASIC3
ENSG00000224452	-0.632748	-0.389718	-0.203835	0.347332	-0.0787452	-0.426292	-0.132494	0.209742	0.149559	0.494104	0.543858	0.286807	greenyellow	RSL24D1P6
ENSG00000225697	-0.813648	-0.581467	-0.494335	0.261161	0.00912757	-0.390926	0.135556	0.855503	0.28255	0.257711	0.826932	0.255731	greenyellow	SLC26A6
ENSG00000228526	-0.761715	-0.171098	0.0241535	0.645843	0.0820601	-0.735138	-0.0553537	0.614252	0.450581	-0.174707	0.848159	0.618902	greenyellow	MIR34AHG
ENSG00000234005	-0.575158	-0.375651	-0.704419	-0.212102	-0.455846	-0.331329	-0.178009	0.538306	-0.122987	0.319492	0.64509	0.297208	greenyellow	GAPDHP22
ENSG00000234367	-0.888256	-0.469421	-0.252375	0.586126	0.207001	-0.639211	-0.184637	0.469489	0.220859	0.525725	0.864157	0.469962	greenyellow	PFN1P3
ENSG00000270103	-0.659934	-0.351007	-0.361361	0.200731	-0.0944188	-0.429508	0.0410701	0.733869	0.184101	-0.000408823	0.736316	0.350134	greenyellow	RNU11
ENSG00000002586	-0.850276	-0.649999	-0.692388	0.164204	-0.0241372	-0.38809	-0.0403687	0.705115	0.20751	0.63827	0.836657	0.24602	cyan	CD99
ENSG00000005238	-0.850199	-0.550869	-0.305974	0.544777	0.234479	-0.452234	0.197589	0.797589	0.678882	0.27921	0.826974	0.269639	cyan	FAM214B
ENSG00000006611	-0.702501	-0.779994	-0.392462	0.331008	0.358482	-0.0387916	0.54872	0.982051	0.441271	0.271269	0.61331	-0.140886	cyan	USH1C
ENSG00000007384	-0.675049	-0.608065	-0.0346531	0.602365	0.453237	-0.171082	0.586469	0.921291	0.604088	-0.0399445	0.595932	-0.0173263	cyan	RHBDF1
ENSG00000008128	-0.735776	-0.821897	-0.38383	0.357921	0.342001	-0.041852	0.58223	0.998551	0.465017	0.288469	0.62484	-0.152671	cyan	CDK11A
ENSG00000010295	-0.427579	-0.568994	-0.00892746	0.513141	0.659679	0.105645	0.678516	0.75398	0.697392	0.0686193	0.313564	-0.277301	cyan	IFFO1
ENSG00000011422	-0.426498	-0.854764	-0.209567	0.312212	0.620236	0.376548	0.886961	0.878195	0.499743	0.27386	0.22311	-0.571375	cyan	PLAUR
ENSG00000012124	-0.797256	-0.70175	-0.597249	0.236132	-0.0658367	-0.24649	0.261028	0.741055	0.741851	0.558139	0.697455	0.0572383	cyan	CD22
ENSG00000019186	-0.643207	-0.917877	-0.335125	0.370567	0.531438	0.164459	0.737707	0.955763	0.479059	0.399446	0.462188	-0.379766	cyan	CYP24A1
ENSG00000042980	-0.851654	-0.893034	-0.687165	0.218345	0.0968022	-0.141719	0.300943	0.795879	0.484483	0.779514	0.706826	-0.0687886	cyan	ADAM28
ENSG00000044446	-0.775428	-0.656771	-0.382112	0.335349	0.233105	-0.280846	0.233683	0.859917	0.09938	0.273037	0.750346	0.133051	cyan	PHKA2
ENSG00000046651	-0.605669	-0.912249	-0.512107	0.165921	0.342301	0.208218	0.690035	0.957853	0.440105	0.44302	0.446431	-0.396471	cyan	OFD1
ENSG00000061656	-0.712274	-0.70168	-0.463624	0.243851	0.250017	-0.141608	0.348856	0.914868	0.219678	0.294098	0.67532	-0.00431538	cyan	SPAG4
ENSG00000062038	-0.898882	-0.736095	-0.415347	0.430113	0.0438617	-0.360422	0.253516	0.770875	0.524339	0.478694	0.78454	0.14861	cyan	CDH3
ENSG00000065618	-0.539509	-0.885833	-0.436622	0.167804	0.488233	0.238026	0.587659	0.835382	0.0764116	0.500878	0.383702	-0.406019	cyan	COL17A1
ENSG00000067191	-0.771162	-0.741427	-0.290549	0.549245	0.440103	-0.164562	0.469816	0.819822	0.769206	0.43165	0.641157	-0.0589926	cyan	CACNB1
ENSG00000072778	-0.658951	-0.764362	-0.199966	0.442009	0.522276	-0.0206875	0.559758	0.911608	0.213114	0.21165	0.549916	-0.160707	cyan	ACADVL
ENSG00000073282	-0.74734	-0.887139	-0.627949	0.142831	0.126424	-0.00132575	0.494609	0.956017	0.4007	0.501475	0.625586	-0.183432	cyan	TP63
ENSG00000073605	-0.838192	-0.69058	-0.108293	0.71328	0.570928	-0.309605	0.412399	0.880934	0.494986	0.239167	0.751445	0.0934637	cyan	GSDMB
ENSG00000073737	-0.517624	-0.905807	-0.56789	0.0127103	0.258463	0.301567	0.679663	0.915044	0.261938	0.446887	0.35971	-0.463486	cyan	DHRS9
ENSG00000079385	-0.714102	-0.727748	-0.200223	0.547052	0.549953	-0.101195	0.568942	0.940087	0.575899	0.212662	0.615975	-0.0998556	cyan	CEACAM1
ENSG00000079393	-0.631103	-0.891714	-0.568018	0.150946	0.299478	0.157398	0.615189	0.929034	0.484099	0.503801	0.484824	-0.343261	cyan	DUSP13
ENSG00000080947	-0.0208549	-0.478154	-0.463384	-0.427049	-0.00983729	0.463032	0.418426	0.504674	-0.367879	0.133936	-0.0304185	-0.4663	cyan	CROCCP3
ENSG00000082074	-0.863038	-0.834863	-0.522252	0.356303	0.265423	-0.197622	0.375819	0.946566	0.430933	0.496164	0.770403	-0.0028253	cyan	FYB
ENSG00000084636	-0.710578	-0.734109	-0.0169382	0.694208	0.683628	-0.105341	0.610225	0.889066	0.49639	0.172727	0.577664	-0.114528	cyan	COL16A1
ENSG00000087074	-0.720693	-0.61424	-0.147048	0.553578	0.300113	-0.217652	0.535923	0.892682	0.78235	0.0636958	0.634397	0.0203069	cyan	PPP1R15A
ENSG00000087494	-0.421353	-0.792798	-0.394563	0.0938679	0.410179	0.319001	0.72049	0.90398	0.257794	0.24716	0.294635	-0.461682	cyan	PTHLH
ENSG00000088340	-0.718057	-0.422181	-0.162554	0.487449	0.233389	-0.415636	0.229507	0.832839	0.41183	-0.0531126	0.752668	0.284438	cyan	FER1L4
ENSG00000088448	-0.634704	-0.770569	-0.168433	0.519251	0.540754	-0.0162568	0.421499	0.550088	0.364367	0.61076	0.426756	-0.204773	cyan	ANKRD10
ENSG00000088836	-0.920236	-0.769451	-0.331736	0.549352	0.281679	-0.337032	0.367904	0.921527	0.527322	0.363476	0.823758	0.117221	cyan	SLC4A11
ENSG00000092068	-0.802988	-0.629033	-0.411474	0.312946	-0.0105289	-0.328573	0.288567	0.880186	0.428139	0.19784	0.765223	0.167692	cyan	SLC7A8
ENSG00000095596	-0.472338	-0.814901	-0.518039	0.0396979	0.0612403	0.270499	0.671169	0.725147	0.684787	0.490941	0.267097	-0.452637	cyan	CYP26A1
ENSG00000096093	-0.807742	-0.823145	-0.309069	0.54017	0.360453	-0.151729	0.459074	0.745165	0.702119	0.576735	0.620113	-0.0945185	cyan	EFHC1
ENSG00000100083	-0.854605	-0.66861	-0.243259	0.567031	0.382337	-0.351579	0.330181	0.919862	0.394583	0.215985	0.808843	0.162349	cyan	GGA1
ENSG00000100181	-0.597992	-0.848175	-0.329296	0.310969	0.547711	0.114516	0.490542	0.752724	0.0452832	0.528773	0.438406	-0.296292	cyan	TPTEP1
ENSG00000100292	-0.838685	-0.833624	-0.477271	0.408388	0.346054	-0.163705	0.418758	0.919524	0.542271	0.516652	0.72842	-0.0476556	cyan	HMOX1
ENSG00000100298	-0.713917	-0.703757	-0.401946	0.364938	0.255555	-0.120479	0.48098	0.881897	0.737075	0.323299	0.622099	-0.0686766	cyan	APOBEC3H
ENSG00000100867	-0.592724	-0.862537	-0.405971	0.251564	0.365175	0.183534	0.741682	0.960567	0.583084	0.330392	0.432824	-0.378642	cyan	DHRS2
ENSG00000101104	-0.698622	-0.815873	-0.294788	0.421321	0.364884	0.00427023	0.682836	0.971096	0.656256	0.24914	0.552694	-0.216604	cyan	PABPC1L
ENSG00000101115	-0.495711	-0.55066	0.204783	0.702381	0.719206	-0.00442977	0.727933	0.819534	0.621	-0.141226	0.381912	-0.183034	cyan	SALL4
ENSG00000101188	-0.895337	-0.682226	-0.598627	0.263086	0.0410871	-0.409173	0.0491843	0.80436	0.198855	0.519445	0.87673	0.252722	cyan	NTSR1
ENSG00000101782	-0.484137	-0.699241	-0.174753	0.377289	0.52365	0.166263	0.757705	0.902244	0.627867	0.100774	0.358955	-0.341728	cyan	RIOK3
ENSG00000102265	-0.595262	-0.942067	-0.48041	0.171935	0.341627	0.243757	0.731411	0.945521	0.406525	0.447205	0.41101	-0.439656	cyan	TIMP1
ENSG00000102287	-0.501406	-0.60862	-0.0878365	0.435884	0.420944	0.0569272	0.724175	0.883186	0.716801	-0.0388388	0.395205	-0.229273	cyan	GABRE
ENSG00000102547	-0.68015	-0.351448	-0.346439	0.323545	-0.0111429	-0.435042	0.0880194	0.680572	0.625619	0.119934	0.720765	0.318474	cyan	CAB39L
ENSG00000104368	-0.827351	-0.896606	-0.422174	0.409503	0.3207	-0.0940199	0.538725	0.960092	0.495317	0.456518	0.678501	-0.129908	cyan	PLAT
ENSG00000104419	-0.671165	-0.839808	-0.526964	0.169218	0.213058	0.0548227	0.573389	0.976542	0.407154	0.358933	0.559759	-0.228722	cyan	NDRG1
ENSG00000104783	-0.688973	-0.810919	-0.445283	0.241081	0.316137	-0.00991824	0.489252	0.944331	0.190773	0.34038	0.596254	-0.156415	cyan	KCNN4
ENSG00000105327	-0.763349	-0.509845	-0.370246	0.361373	-0.16462	-0.406508	0.152696	0.574248	0.790069	0.374245	0.679563	0.227021	cyan	BBC3
ENSG00000105397	-0.686249	-0.709709	-0.496627	0.227696	0.0849978	-0.0821894	0.478785	0.879514	0.713164	0.328057	0.593979	-0.0935328	cyan	TYK2
ENSG00000105717	-0.555491	-0.982402	-0.540661	0.115263	0.385388	0.326121	0.716953	0.876474	0.362977	0.599128	0.346987	-0.523082	cyan	PBX4
ENSG00000107159	-0.583109	-0.851999	-0.612882	-0.00320957	0.203248	0.144596	0.436622	0.831958	-0.0186579	0.527298	0.468981	-0.285378	cyan	CA9
ENSG00000108465	-0.824343	-0.571188	-0.0434454	0.736787	0.493935	-0.402878	0.363556	0.871791	0.560858	0.0772378	0.779952	0.204737	cyan	CDK5RAP3
ENSG00000108846	-0.566761	-0.924604	-0.373787	0.243567	0.424734	0.261496	0.781108	0.934102	0.414393	0.380427	0.372354	-0.462361	cyan	ABCC3
ENSG00000110031	-0.903422	-0.549781	-0.239722	0.585774	0.248079	-0.53626	0.138916	0.839306	0.380867	0.187269	0.903905	0.363363	cyan	LPXN
ENSG00000110944	-0.339788	-0.602087	0.0891213	0.457755	0.657977	0.241797	0.847558	0.835581	0.494857	-0.132917	0.209127	-0.400955	cyan	IL23A
ENSG00000112659	-0.925821	-0.696166	-0.310558	0.579783	0.296685	-0.410585	0.300142	0.914867	0.546524	0.308123	0.866703	0.203141	cyan	CUL9
ENSG00000112715	-0.468706	-0.733857	-0.132012	0.375822	0.607951	0.206771	0.770734	0.920494	0.378638	0.0789088	0.341049	-0.375326	cyan	VEGFA
ENSG00000113504	-0.669764	-0.506889	0.0815689	0.677201	0.443321	-0.271671	0.505146	0.851482	0.562288	-0.13813	0.612964	0.0929079	cyan	SLC12A7
ENSG00000114270	-0.589824	-0.809458	-0.363485	0.237481	0.408571	0.11473	0.603646	0.937088	0.185132	0.270223	0.477479	-0.2775	cyan	COL7A1
ENSG00000114923	-0.428646	-0.0944713	-0.0137937	0.349732	0.0554916	-0.373352	0.153825	0.593227	0.496221	-0.340713	0.521204	0.314491	cyan	SLC4A3
ENSG00000115548	-0.489069	-0.601779	-0.446973	0.00806322	0.0279413	0.0376988	0.445317	0.849965	0.167907	0.0895649	0.454412	-0.136187	cyan	KDM3A
ENSG00000115919	-0.493943	-0.94244	-0.561579	0.0348919	0.390113	0.358706	0.66675	0.847409	0.199576	0.580265	0.311253	-0.528446	cyan	KYNU
ENSG00000118705	-0.673285	-0.740548	-0.220464	0.465159	0.322176	-0.0978496	0.359309	0.528377	0.415008	0.594833	0.47146	-0.119966	cyan	RPN2
ENSG00000119681	-0.587921	-0.500908	-0.331418	0.142317	-0.0116764	-0.216979	0.183036	0.704854	-0.0724653	0.102005	0.58168	0.122729	cyan	LTBP2
ENSG00000120708	-0.523627	-0.9127	-0.281277	0.302763	0.50536	0.302944	0.835266	0.895389	0.462697	0.35534	0.308213	-0.511604	cyan	TGFBI
ENSG00000122884	-0.775724	-0.827498	-0.453508	0.287851	0.199654	-0.107169	0.451925	0.92979	0.28377	0.380027	0.665609	-0.0795258	cyan	P4HA1
ENSG00000124107	-0.494155	-0.732357	-0.180087	0.369789	0.397493	0.182439	0.806053	0.86012	0.776667	0.146763	0.322664	-0.378866	cyan	SLPI
ENSG00000124143	-0.668485	-0.558425	-0.132986	0.555141	0.43879	-0.204073	0.479625	0.86566	0.696196	0.0619178	0.617263	0.027695	cyan	ARHGAP40
ENSG00000124191	-0.286618	-0.618902	-0.443779	-0.00800207	0.312959	0.318883	0.559158	0.6647	0.44505	0.341993	0.183733	-0.4304	cyan	TOX2
ENSG00000124216	-0.545692	-0.226664	-0.330447	0.169379	-0.230413	-0.393351	0.0725064	0.59807	0.595075	-0.0389617	0.607713	0.316574	cyan	SNAI1
ENSG00000124466	-0.572511	-0.863984	-0.231138	0.383208	0.552045	0.200621	0.79385	0.949883	0.455478	0.255817	0.39672	-0.404419	cyan	LYPD3
ENSG00000125730	-0.749659	-0.861946	-0.216864	0.567174	0.618099	-0.0414901	0.559006	0.851887	0.40836	0.458701	0.578778	-0.189412	cyan	C3
ENSG00000127481	-0.652769	-0.970809	-0.486728	0.246685	0.39608	0.20068	0.705968	0.927336	0.498396	0.548146	0.453524	-0.417105	cyan	UBR4
ENSG00000127507	-0.38865	-0.647453	-0.259479	0.166737	0.290796	0.231101	0.746074	0.878753	0.532451	0.018323	0.282518	-0.369351	cyan	ADGRE2
ENSG00000128918	-0.463912	-0.858579	-0.711517	-0.109058	0.0252911	0.303864	0.495455	0.585273	0.49826	0.807221	0.250019	-0.474041	cyan	ALDH1A2
ENSG00000130066	-0.759077	-0.758612	-0.394232	0.352474	0.234452	-0.130853	0.512784	0.983573	0.521829	0.240882	0.673649	-0.0553107	cyan	SAT1
ENSG00000130158	-0.718641	-0.483288	0.109422	0.792664	0.50427	-0.349276	0.462468	0.802587	0.773179	-0.0622614	0.655376	0.149549	cyan	DOCK6
ENSG00000130175	-0.715099	-0.920546	-0.310454	0.434909	0.494838	0.0673719	0.672525	0.929783	0.454191	0.429897	0.528637	-0.294789	cyan	PRKCSH
ENSG00000130529	-0.65711	-0.492636	0.00747184	0.617629	0.337738	-0.259263	0.514237	0.841423	0.747999	-0.110682	0.598468	0.0802803	cyan	TRPM4
ENSG00000130600	-0.614637	-0.843468	-0.844308	-0.164176	-0.0309508	0.0762384	0.181175	0.624273	-0.0301113	0.869149	0.491487	-0.210032	cyan	H19
ENSG00000130684	-0.714097	-0.569657	-0.195615	0.454915	0.356369	-0.278653	0.317494	0.873753	0.195708	0.0668451	0.702666	0.133987	cyan	ZNF337
ENSG00000130787	-0.734972	-0.513289	0.106077	0.75534	0.548862	-0.368303	0.351935	0.776586	0.330092	-0.0138507	0.684812	0.186713	cyan	HIP1R
ENSG00000132003	-0.860018	-0.489695	-0.129656	0.651763	0.26009	-0.529408	0.22101	0.841588	0.564987	0.0487901	0.858036	0.352662	cyan	ZSWIM4
ENSG00000132424	-0.829644	-0.774568	-0.417824	0.368001	0.164122	-0.216635	0.424173	0.950281	0.444382	0.31131	0.739674	0.0232967	cyan	PNISR
ENSG00000132470	-0.654216	-0.699346	-0.0278335	0.600206	0.55667	-0.0638491	0.661796	0.922796	0.502854	0.0436898	0.534137	-0.137487	cyan	ITGB4
ENSG00000132510	-0.555878	-0.525173	-0.276264	0.226208	0.212281	-0.120738	0.370936	0.854088	0.141043	-0.0113034	0.556862	0.0161564	cyan	KDM6B
ENSG00000132680	-0.541223	-0.873042	-0.359019	0.239409	0.480681	0.247688	0.749368	0.952459	0.34979	0.312824	0.383841	-0.429526	cyan	KIAA0907
ENSG00000133619	-0.315642	-0.153486	0.227352	0.433075	0.283205	-0.186853	0.382379	0.628961	0.267804	-0.512397	0.356091	0.120478	cyan	KRBA1
ENSG00000134107	-0.219993	-0.28368	0.191654	0.358529	0.283495	0.071621	0.647838	0.645478	0.526841	-0.430564	0.167704	-0.168611	cyan	BHLHE40
ENSG00000134759	-0.640697	-0.847334	-0.615238	0.0744895	0.250537	0.0838927	0.447112	0.893075	0.154116	0.512076	0.541142	-0.236969	cyan	ELP2
ENSG00000135047	-0.927479	-0.739594	-0.277462	0.621293	0.284299	-0.375206	0.356016	0.858508	0.669497	0.38407	0.81546	0.141776	cyan	CTSL
ENSG00000135404	-0.702895	-0.926205	-0.330255	0.453551	0.567396	0.0887425	0.646355	0.86586	0.527883	0.549204	0.502769	-0.323942	cyan	CD63
ENSG00000135723	-0.364282	-0.847908	-0.406397	0.0191637	0.382392	0.431403	0.77371	0.857043	0.157293	0.3082	0.196316	-0.575779	cyan	FHOD1
ENSG00000135929	-0.943155	-0.789888	-0.604312	0.348031	0.0752904	-0.366275	0.120575	0.739041	0.442623	0.732292	0.840617	0.158601	cyan	CYP27A1
ENSG00000135976	-0.652416	-0.717414	-0.78101	-0.102321	-0.206651	-0.0530996	0.286547	0.803199	0.393906	0.500907	0.589579	-0.0757215	cyan	ANKRD36
ENSG00000137331	-0.508612	-0.724014	-0.106132	0.423984	0.512744	0.153242	0.80293	0.929961	0.572635	0.0370483	0.367143	-0.33861	cyan	IER3
ENSG00000137745	-0.406397	-0.74463	-0.14591	0.319222	0.45649	0.300979	0.881964	0.858266	0.66694	0.104345	0.223421	-0.486274	cyan	MMP13
ENSG00000138100	-0.928512	-0.554634	-0.257009	0.607938	0.215942	-0.556087	0.152082	0.840864	0.533942	0.213361	0.919643	0.371023	cyan	TRIM54
ENSG00000138166	-0.785685	-0.540177	-0.228955	0.539031	0.241961	-0.37337	0.332627	0.858963	0.71881	0.115329	0.757715	0.195363	cyan	DUSP5
ENSG00000139289	-0.0944852	-0.22981	0.162681	0.286919	0.433085	0.186526	0.643877	0.606338	0.510408	-0.408191	0.0701871	-0.255277	cyan	PHLDA1
ENSG00000139318	-0.401947	-0.616528	-0.173156	0.252667	0.445641	0.178643	0.69299	0.889826	0.352355	-0.0354109	0.325274	-0.307935	cyan	DUSP6
ENSG00000139624	-0.762732	-0.971939	-0.640757	0.187984	0.207974	0.0441312	0.464799	0.81779	0.409368	0.771967	0.572253	-0.260627	cyan	CERS5
ENSG00000140451	-0.524212	-0.755509	-0.343898	0.259123	0.438444	0.167162	0.683408	0.918517	0.526407	0.239143	0.407424	-0.335231	cyan	PIF1
ENSG00000141040	-0.85733	-0.749534	-0.695275	0.147365	-0.168408	-0.316775	0.0404859	0.612342	0.313985	0.779662	0.748675	0.137325	cyan	ZNF287
ENSG00000141458	-0.672803	-0.7821	-0.126414	0.537498	0.540108	-0.00751223	0.683653	0.946333	0.478554	0.158631	0.531477	-0.201801	cyan	NPC1
ENSG00000141738	-0.888298	-0.532714	-0.130323	0.716812	0.294714	-0.520481	0.24904	0.796772	0.755421	0.172454	0.84479	0.314425	cyan	GRB7
ENSG00000142347	-0.541793	-0.384429	-0.488981	0.0198694	-0.425331	-0.24979	0.1431	0.519702	0.663146	0.227079	0.505974	0.143024	cyan	MYO1F
ENSG00000142552	-0.362005	-0.577581	-0.271554	0.0534456	0.267986	0.150267	0.459944	0.743077	-0.155178	0.0612556	0.311504	-0.233502	cyan	RCN3
ENSG00000143178	-0.725242	-0.63146	0.00138708	0.662395	0.51732	-0.260106	0.349503	0.689928	0.225785	0.234525	0.612003	0.0630816	cyan	TBX19
ENSG00000143198	-0.853229	-0.78949	-0.503896	0.398644	0.32715	-0.253787	0.18829	0.725705	0.340105	0.711573	0.745829	0.0518192	cyan	MGST3
ENSG00000143369	-0.621297	-0.548928	0.166787	0.768557	0.642051	-0.163838	0.625175	0.831799	0.688839	-0.0916606	0.521338	-0.0378021	cyan	ECM1
ENSG00000143512	-0.258775	-0.465144	0.103574	0.340314	0.459266	0.202081	0.760077	0.770992	0.385693	-0.293272	0.173464	-0.318478	cyan	HHIPL2
ENSG00000143546	-0.541555	-0.923902	-0.784767	-0.164193	0.0638343	0.272259	0.491361	0.802362	0.141867	0.692316	0.386507	-0.419598	cyan	S100A8
ENSG00000144285	-0.423629	-0.674965	-0.455575	-0.0327991	0.183537	0.18228	0.497007	0.831034	-0.0122901	0.188013	0.361832	-0.279121	cyan	SCN1A
ENSG00000144355	-0.391339	-0.304008	0.283886	0.623065	0.500959	-0.116263	0.589892	0.720557	0.594093	-0.409213	0.356708	-0.0147014	cyan	DLX1
ENSG00000146556	-0.880507	-0.841153	-0.471357	0.416558	0.266749	-0.209316	0.42843	0.962314	0.541521	0.458924	0.772143	-0.00586372	cyan	WASH2P
ENSG00000146674	-0.486342	-0.839229	-0.391735	0.131867	0.389114	0.275802	0.712781	0.922607	0.213584	0.278332	0.344517	-0.433018	cyan	IGFBP3
ENSG00000147100	-0.500677	-0.817279	-0.581537	-0.0726245	0.140274	0.205211	0.451295	0.773465	-0.0966495	0.475848	0.379308	-0.330431	cyan	SLC16A2
ENSG00000147689	-0.283448	-0.641673	-0.715289	-0.359403	-0.0140465	0.315223	0.354634	0.658252	-0.106748	0.421258	0.230046	-0.367684	cyan	FAM83A
ENSG00000149451	-0.973037	-0.667425	-0.51897	0.389989	-0.00406637	-0.521988	0.0388158	0.786608	0.353805	0.495698	0.937851	0.340136	cyan	ADAM33
ENSG00000151322	-0.642548	-0.508716	0.0992361	0.680559	0.61239	-0.249578	0.427441	0.811968	0.276772	-0.075703	0.602717	0.0869582	cyan	NPAS3
ENSG00000152763	-0.409661	-0.697915	-0.56703	-0.141163	0.0857003	0.222083	0.479288	0.815449	-0.00104787	0.269754	0.342923	-0.312902	cyan	WDR78
ENSG00000153395	-0.622863	-0.675698	-0.141213	0.441048	0.51236	-0.0744065	0.455827	0.828979	0.0664031	0.161516	0.541182	-0.0848389	cyan	LPCAT1
ENSG00000155256	-0.848259	-0.90547	-0.53333	0.331131	0.239079	-0.111156	0.475626	0.957475	0.48414	0.533185	0.711936	-0.105309	cyan	ZFYVE27
ENSG00000156804	-0.529568	-0.865089	-0.213474	0.408119	0.635835	0.25949	0.825925	0.895922	0.572626	0.323419	0.332197	-0.472196	cyan	FBXO32
ENSG00000158406	-0.0236858	-0.16151	-0.428761	-0.366378	-0.373777	0.183694	0.261215	0.362001	0.377189	-0.0520842	0.0389034	-0.175947	cyan	HIST1H4H
ENSG00000158863	-0.544465	-0.652297	-0.278808	0.254759	0.363365	0.0245688	0.535423	0.915133	0.21047	0.0727632	0.49161	-0.15722	cyan	FAM160B2
ENSG00000159167	-0.310672	-0.765104	-0.657741	-0.286903	0.0363216	0.409929	0.573095	0.766073	0.0375287	0.387443	0.194902	-0.501354	cyan	STC1
ENSG00000159208	-0.677637	-0.504527	0.0974717	0.732256	0.398329	-0.282141	0.516585	0.757985	0.830453	-0.0399084	0.578029	0.0767647	cyan	CIART
ENSG00000159899	-0.797396	-0.517389	-0.0102152	0.694806	0.426887	-0.436904	0.288182	0.82474	0.355891	0.0122489	0.773184	0.261022	cyan	NPR2
ENSG00000160801	-0.515546	-0.351378	-0.308386	0.137235	-0.273752	-0.240192	0.264092	0.626015	0.619683	-0.0220218	0.498656	0.136565	cyan	PTH1R
ENSG00000162599	-0.317332	-0.505179	-0.506732	-0.150568	0.131852	0.144893	0.291416	0.674226	-0.103735	0.203889	0.320739	-0.190339	cyan	NFIA
ENSG00000162645	-0.828687	-0.605255	-0.543832	0.298335	-0.120081	-0.38735	0.126614	0.657121	0.752366	0.533834	0.754599	0.20422	cyan	GBP2
ENSG00000163162	-0.632742	-0.929221	-0.419869	0.246663	0.374177	0.180202	0.705756	0.94655	0.373027	0.415446	0.453232	-0.381632	cyan	RNF149
ENSG00000163220	-0.381581	-0.868146	-0.361775	0.103957	0.455161	0.440176	0.848233	0.884599	0.333427	0.303885	0.194827	-0.605418	cyan	S100A9
ENSG00000163565	-0.50789	-0.843841	-0.630464	-0.0187573	0.0606039	0.259664	0.627322	0.782297	0.629282	0.549171	0.327723	-0.433343	cyan	IFI16
ENSG00000163660	-0.657357	-0.508725	-0.214425	0.325994	0.0284931	-0.276096	0.31409	0.783347	0.285366	-0.00243137	0.626998	0.142404	cyan	CCNL1
ENSG00000163739	-0.555251	-0.711747	-0.430478	0.177589	0.207403	0.0872874	0.611971	0.907977	0.611335	0.22166	0.457561	-0.245866	cyan	CXCL1
ENSG00000163874	-0.557288	-0.465528	-0.356332	0.186652	-0.123272	-0.16597	0.376274	0.720217	0.750261	0.0790838	0.511615	0.0340557	cyan	ZC3H12A
ENSG00000163993	-0.588748	-0.803988	-0.53687	0.15715	0.11766	0.116413	0.546493	0.711136	0.769423	0.594595	0.401823	-0.314937	cyan	S100P
ENSG00000164078	-0.334865	-0.761366	-0.43343	-0.0723271	0.242678	0.376309	0.667215	0.816146	0.0287802	0.236415	0.207874	-0.488709	cyan	MST1R
ENSG00000164692	-0.9432	-0.805122	-0.516783	0.429809	0.207359	-0.35175	0.170484	0.770165	0.390533	0.684054	0.835525	0.13708	cyan	COL1A2
ENSG00000165359	-0.684192	-0.75681	-0.118517	0.554697	0.548581	-0.0442203	0.656275	0.954883	0.477906	0.131781	0.559755	-0.160723	cyan	DDX26B
ENSG00000165458	-0.556256	-0.538901	-0.00898651	0.499655	0.459184	-0.0957464	0.574194	0.890025	0.399498	-0.144501	0.506996	-0.0539682	cyan	INPPL1
ENSG00000166436	-0.317763	-0.463773	-0.173698	0.107921	0.29595	0.10815	0.470047	0.753894	-0.0396695	-0.117382	0.305971	-0.17634	cyan	TRIM66
ENSG00000166446	-0.575892	-0.326634	-0.0954355	0.418018	0.0983497	-0.322503	0.329052	0.759704	0.635358	-0.195852	0.595655	0.203985	cyan	CDYL2
ENSG00000166473	-0.953098	-0.725971	-0.360904	0.579862	0.256689	-0.417868	0.275789	0.862388	0.651299	0.435911	0.867911	0.194543	cyan	PKD1L2
ENSG00000166825	-0.372551	-0.722321	-0.648208	-0.267499	-0.159932	0.285469	0.510158	0.732157	0.13207	0.349139	0.256947	-0.38366	cyan	ANPEP
ENSG00000167615	-0.655285	-0.505016	0.0727574	0.682825	0.567019	-0.253218	0.480675	0.863488	0.475839	-0.113392	0.618081	0.0837551	cyan	LENG8
ENSG00000167653	-0.604447	-0.953693	-0.464341	0.261237	0.463347	0.237798	0.673733	0.814006	0.524409	0.651094	0.384767	-0.45735	cyan	PSCA
ENSG00000168062	-0.943591	-0.621971	-0.484593	0.396113	-0.0526984	-0.515593	0.105269	0.817078	0.530078	0.37967	0.915518	0.335365	cyan	BATF2
ENSG00000168209	-0.679633	-0.835675	-0.243894	0.475766	0.546122	0.0455349	0.700308	0.975243	0.55663	0.270227	0.532396	-0.25903	cyan	DDIT4
ENSG00000168389	-0.384131	-0.717218	-0.32602	0.132303	0.241555	0.303843	0.792937	0.824642	0.686078	0.176326	0.224121	-0.465039	cyan	MFSD2A
ENSG00000168405	-0.38729	-0.118353	0.0385819	0.353422	0.19324	-0.303929	0.194921	0.625329	0.288304	-0.383686	0.483359	0.254858	cyan	CMAHP
ENSG00000169242	-0.740615	-0.914268	-0.46142	0.281002	0.253954	0.0224361	0.571196	0.915651	0.381342	0.478838	0.572697	-0.231819	cyan	EFNA1
ENSG00000169429	-0.530768	-0.421173	-0.139355	0.362978	0.106924	-0.16885	0.472903	0.776759	0.741927	-0.119192	0.496628	0.0326697	cyan	CXCL8
ENSG00000171163	-0.540369	-0.601791	-0.0922382	0.424569	0.566341	-0.0349098	0.477884	0.827868	0.0740882	0.0498346	0.486564	-0.102927	cyan	ZNF692
ENSG00000172183	-0.676513	-0.539134	-0.194713	0.532318	0.444271	-0.24098	0.353878	0.774378	0.651022	0.203185	0.633276	0.0702344	cyan	ISG20
ENSG00000172379	-0.116735	-0.608152	-0.470318	-0.287263	0.188851	0.493769	0.573226	0.662266	-0.135552	0.192214	0.0359033	-0.541566	cyan	ARNT2
ENSG00000172932	-0.646766	-0.863739	-0.451747	0.213944	0.361261	0.0947453	0.572423	0.944454	0.202288	0.383263	0.523029	-0.26844	cyan	ANKRD13D
ENSG00000173295	-0.439906	-0.465555	-0.315378	0.139024	-0.00262919	-0.0121276	0.492163	0.747701	0.697489	0.00136083	0.392693	-0.104529	cyan	FAM86B3P
ENSG00000173846	-0.54264	-0.831195	-0.428892	0.186723	0.330202	0.216707	0.733356	0.941232	0.564874	0.309331	0.394248	-0.396373	cyan	PLK3
ENSG00000175265	-0.618715	-0.709184	-0.119055	0.474641	0.500281	-0.0114874	0.643862	0.94124	0.373744	0.0560247	0.51517	-0.16857	cyan	GOLGA8A
ENSG00000175455	-0.771225	-0.54867	-0.255049	0.424494	0.0971798	-0.363791	0.308712	0.87536	0.445313	0.0444848	0.752389	0.207708	cyan	CCDC14
ENSG00000175787	-0.343509	-0.249026	-0.092824	0.137248	0.161531	-0.188852	-0.00619253	0.409493	-0.474027	-0.0186693	0.387696	0.161144	cyan	ZNF169
ENSG00000175899	-0.783969	-0.905525	-0.361109	0.461305	0.481734	-0.0508174	0.477805	0.811272	0.364081	0.61514	0.603126	-0.17957	cyan	A2M
ENSG00000175906	-0.478062	-0.686597	-0.781128	-0.188183	-0.193927	0.128151	0.314086	0.577168	0.550072	0.670304	0.356091	-0.256457	cyan	ARL4D
ENSG00000178038	-0.720304	-0.495009	-0.0541414	0.600273	0.427993	-0.350808	0.33646	0.862708	0.36301	-0.0483812	0.717095	0.196378	cyan	ALS2CL
ENSG00000179674	-0.563914	-0.783855	-0.382431	0.215456	0.209597	0.141807	0.715183	0.916919	0.648704	0.235569	0.41557	-0.324793	cyan	ARL14
ENSG00000179913	-0.513998	-0.6942	-0.130812	0.474416	0.60816	0.121676	0.719795	0.84477	0.702736	0.178165	0.375682	-0.313615	cyan	B3GNT3
ENSG00000180573	-0.129036	-0.395362	-0.627632	-0.440137	-0.362275	0.2802	0.349735	0.493104	0.31504	0.182308	0.0924368	-0.305064	cyan	HIST1H2AC
ENSG00000181652	-0.622502	-0.857509	-0.426674	0.25164	0.364993	0.139835	0.692928	0.97745	0.515784	0.332813	0.48096	-0.329579	cyan	ATG9B
ENSG00000181744	-0.477097	-0.72745	-0.478637	0.0344539	0.0462311	0.109175	0.242076	0.348607	0.083343	0.778633	0.273961	-0.265549	cyan	C3orf58
ENSG00000182272	-0.667315	-0.875563	-0.722471	0.0058349	0.171346	0.0626591	0.327733	0.796799	0.0723491	0.706075	0.553767	-0.216519	cyan	B4GALNT4
ENSG00000182484	-0.777446	-0.806833	-0.388791	0.376333	0.277601	-0.110525	0.538175	0.990875	0.49371	0.287384	0.671946	-0.0873226	cyan	WASH6P
ENSG00000182578	-0.633777	-0.432952	0.25964	0.825956	0.700137	-0.321736	0.377636	0.699794	0.317352	-0.101004	0.585642	0.149875	cyan	CSF1R
ENSG00000182782	-0.723882	-0.95253	-0.742583	0.053446	0.139804	0.077757	0.432466	0.850771	0.310148	0.750041	0.568741	-0.265495	cyan	HCAR2
ENSG00000183486	-0.604826	-0.738057	-0.713283	-0.0832426	0.0363649	0.0114131	0.263714	0.80337	0.0105779	0.503569	0.557167	-0.121838	cyan	MX2
ENSG00000183856	-0.673369	-0.486871	-0.0544284	0.568014	0.334471	-0.285597	0.451564	0.876796	0.617423	-0.109151	0.648137	0.123534	cyan	IQGAP3
ENSG00000184205	-0.438764	-0.57421	-0.192452	0.322138	0.310356	0.101494	0.662505	0.761145	0.842602	0.0962032	0.322555	-0.264999	cyan	TSPYL2
ENSG00000184206	-0.647525	-0.652073	-0.232768	0.394981	0.248191	-0.0897893	0.592685	0.932801	0.641828	0.051442	0.562208	-0.0863667	cyan	GOLGA6L4
ENSG00000184445	-0.781584	-0.788922	-0.134316	0.646327	0.615517	-0.152617	0.50505	0.859099	0.39744	0.342733	0.642371	-0.0723125	cyan	KNTC1
ENSG00000184786	-0.756479	-0.785672	-0.485536	0.318564	0.282418	-0.0993375	0.468201	0.939313	0.5646	0.403886	0.664375	-0.089863	cyan	TCTE3
ENSG00000185101	-0.75779	-0.57915	-0.13314	0.590137	0.451492	-0.309644	0.38149	0.904016	0.442307	0.0625856	0.730734	0.137156	cyan	ANO9
ENSG00000185596	-0.737653	-0.746801	-0.423517	0.317816	0.219349	-0.112411	0.507799	0.974253	0.550166	0.252188	0.657344	-0.0679729	cyan	WASH3P
ENSG00000185615	-0.57472	-0.943722	-0.409155	0.268678	0.493769	0.275088	0.768946	0.901027	0.526109	0.497773	0.367847	-0.487791	cyan	PDIA2
ENSG00000185864	-0.3847	-0.782328	-0.306813	0.132271	0.374665	0.359803	0.833129	0.901392	0.423127	0.153915	0.228305	-0.515415	cyan	NPIPB4
ENSG00000186081	-0.522604	-0.935503	-0.672691	-0.0558484	0.207259	0.284511	0.445221	0.639535	0.0641648	0.837171	0.318612	-0.451593	cyan	KRT5
ENSG00000187678	-0.406155	-0.578613	-0.281876	0.202173	0.171291	0.142476	0.643107	0.719838	0.839871	0.150919	0.281543	-0.296609	cyan	SPRY4
ENSG00000188234	-0.684935	-0.826085	-0.283585	0.371751	0.361318	-0.00548891	0.543716	0.848984	0.238486	0.350864	0.531246	-0.190929	cyan	AGAP4
ENSG00000188566	-0.183963	-0.301005	-0.0409336	0.12575	0.247264	0.135184	0.544103	0.69411	0.260635	-0.337349	0.188879	-0.186988	cyan	NDOR1
ENSG00000188603	-0.743145	-0.765575	-0.530648	0.233455	-0.0494133	-0.125127	0.391131	0.721593	0.721145	0.555472	0.586058	-0.0793629	cyan	CLN3
ENSG00000196436	-0.795763	-0.944058	-0.545714	0.320373	0.359979	-0.0182338	0.46162	0.852601	0.428454	0.708505	0.624758	-0.204414	cyan	NPIPB15
ENSG00000196611	-0.255488	-0.724786	-0.478084	-0.180761	0.173008	0.44123	0.666252	0.778743	0.0251007	0.223803	0.13648	-0.533473	cyan	MMP1
ENSG00000196696	-0.806175	-0.753761	-0.325403	0.505928	0.34962	-0.189595	0.504083	0.936712	0.725091	0.314845	0.700513	-0.0253282	cyan	PDXDC2P
ENSG00000196739	-0.387021	-0.778006	-0.285675	0.139869	0.448323	0.341266	0.769898	0.889066	0.204044	0.161003	0.247363	-0.485188	cyan	COL27A1
ENSG00000197102	-0.54311	-0.978215	-0.503967	0.15916	0.420764	0.32631	0.675198	0.759158	0.39028	0.710186	0.304268	-0.535501	cyan	DYNC1H1
ENSG00000197261	-0.410167	-0.788348	-0.481357	-0.0242762	0.262947	0.321575	0.668306	0.884383	0.167192	0.269102	0.291949	-0.448257	cyan	C6orf141
ENSG00000197467	-0.53245	-0.131196	0.280114	0.6941	0.21714	-0.476375	0.258955	0.573228	0.665456	-0.403062	0.554604	0.353551	cyan	COL13A1
ENSG00000197847	-0.428348	-0.656468	-0.0308073	0.455679	0.714047	0.182885	0.742356	0.859234	0.414728	0.0328198	0.314222	-0.346283	cyan	SLC22A20
ENSG00000198125	-0.763854	-0.855721	-0.499893	0.301763	0.295301	-0.043026	0.532459	0.980006	0.508827	0.426258	0.648362	-0.155108	cyan	MB
ENSG00000204149	-0.468538	-0.877659	-0.227163	0.308025	0.594698	0.338731	0.849965	0.896515	0.384402	0.286396	0.269596	-0.533159	cyan	AGAP6
ENSG00000204172	-0.72285	-0.866708	-0.344675	0.397637	0.449931	0.0140107	0.629369	0.988562	0.428477	0.334169	0.585884	-0.22004	cyan	AGAP9
ENSG00000204177	-0.646889	-0.533356	-0.0111931	0.556876	0.373451	-0.219791	0.499171	0.875782	0.443596	-0.117006	0.59813	0.0568907	cyan	BMS1P1
ENSG00000204681	-0.789479	-0.723679	-0.235318	0.518337	0.468229	-0.233264	0.351194	0.858908	0.184468	0.307935	0.711282	0.047053	cyan	GABBR1
ENSG00000205085	-0.556	-0.981785	-0.56433	0.0706995	0.259744	0.318567	0.703615	0.839617	0.380369	0.614618	0.333376	-0.516681	cyan	FAM71F2
ENSG00000205363	-0.814286	-0.761126	-0.526418	0.247852	0.15482	-0.240812	0.191233	0.807682	0.0482185	0.512056	0.747169	0.0782735	cyan	C15orf59
ENSG00000205420	-0.309881	-0.823617	-0.427751	-0.0424541	0.361958	0.477478	0.777136	0.836716	0.151066	0.296576	0.148705	-0.608584	cyan	KRT6A
ENSG00000213658	-0.614484	-0.763802	-0.319964	0.292209	0.119969	0.0122513	0.48885	0.621435	0.510229	0.489517	0.409675	-0.216672	cyan	LAT
ENSG00000214855	0.0902554	-0.283396	-0.310739	-0.339731	0.0702197	0.441218	0.461738	0.486483	-0.045518	-0.113996	-0.0899879	-0.424013	cyan	APOC1P1
ENSG00000214860	-0.70086	-0.747454	-0.379969	0.276262	0.277994	-0.118396	0.301665	0.769173	-0.0320533	0.416628	0.607807	-0.0402337	cyan	EVPLL
ENSG00000215252	-0.611832	-0.630076	-0.121899	0.443059	0.348463	-0.0755693	0.606024	0.92412	0.475477	-0.0344144	0.53117	-0.0925459	cyan	GOLGA8B
ENSG00000215417	-0.486088	-0.972352	-0.535644	0.0744144	0.426677	0.39028	0.678128	0.765942	0.2629	0.689818	0.261265	-0.579188	cyan	MIR17HG
ENSG00000217442	-0.5436	-0.532832	-0.875446	-0.296911	-0.554427	-0.129522	-0.0277719	0.424762	0.369853	0.687443	0.486794	0.0394888	cyan	SYCE3
ENSG00000221978	-0.828458	-0.52295	-0.115922	0.611203	0.295928	-0.470483	0.231954	0.837906	0.343255	0.0504582	0.81826	0.302505	cyan	CCNL2
ENSG00000226074	-0.122062	-0.422056	-0.512382	-0.398833	-0.101327	0.284569	0.275493	0.529524	-0.353804	0.116141	0.120839	-0.280816	cyan	PRSS44
ENSG00000228486	-0.84043	-0.677943	-0.160814	0.659512	0.417071	-0.311468	0.46184	0.922208	0.692679	0.182001	0.754655	0.0940699	cyan	LINC01125
ENSG00000230937	-0.881777	-0.517829	-0.1239	0.697596	0.231116	-0.528564	0.25054	0.792397	0.754979	0.134507	0.838928	0.325964	cyan	MIR205HG
ENSG00000232931	-0.700117	-0.847189	-0.480849	0.265702	0.250731	0.0334529	0.616243	0.965567	0.620943	0.38282	0.56468	-0.232137	cyan	LINC00342
ENSG00000235884	-0.116645	-0.608406	-0.628276	-0.441017	-0.0467866	0.494553	0.521199	0.629903	-0.0554912	0.273143	0.0352973	-0.533416	cyan	LINC00941
ENSG00000240344	-0.205661	-0.291313	-0.336111	-0.151133	-0.162105	0.0917641	0.374269	0.621448	0.275808	-0.167633	0.226844	-0.119428	cyan	PPIL3
ENSG00000242802	-0.296664	-0.742226	-0.216869	0.211643	0.532924	0.435671	0.872314	0.778145	0.625828	0.224569	0.108799	-0.603673	cyan	AP5Z1
ENSG00000243716	-0.459298	-0.82209	-0.302251	0.20753	0.405856	0.30593	0.829846	0.929451	0.47067	0.198022	0.292335	-0.481261	cyan	NPIPB5
ENSG00000245532	-0.695099	-0.65779	-0.0296498	0.651993	0.505122	-0.145571	0.632207	0.912803	0.713059	0.0396494	0.583301	-0.0652095	cyan	NEAT1
ENSG00000247844	-0.480744	-0.887725	-0.452547	0.08647	0.407321	0.322456	0.690925	0.885388	0.14044	0.404945	0.320547	-0.482237	cyan	CCAT1
ENSG00000248527	-0.955022	-0.7416	-0.426979	0.475285	0.164271	-0.417769	0.219419	0.873733	0.413286	0.437396	0.885119	0.213945	cyan	MTATP6P1
ENSG00000251562	-0.756011	-0.864202	-0.307512	0.479285	0.459224	-0.0239281	0.650945	0.97825	0.609977	0.346121	0.603009	-0.201957	cyan	MALAT1
ENSG00000256667	-0.529195	-0.727338	-0.191239	0.328917	0.397975	0.122115	0.725794	0.93745	0.412482	0.054546	0.407967	-0.290759	cyan	KLRAP1
ENSG00000261326	-0.582844	-0.943715	-0.624048	0.0206572	0.270436	0.233637	0.521841	0.813552	0.074922	0.658049	0.412829	-0.402243	cyan	LINC01355
ENSG00000261556	-0.487776	-0.90714	-0.420613	0.153721	0.466651	0.345653	0.777002	0.916922	0.340947	0.397462	0.308767	-0.52482	cyan	SMG1P7
ENSG00000265787	-0.752183	-0.720757	-0.70088	0.0835747	-0.217932	-0.186422	0.211505	0.654882	0.637051	0.668781	0.633194	0.00931468	cyan	CYP4F35P
ENSG00000269713	-0.421907	-0.12159	0.305067	0.613958	0.277071	-0.344939	0.344545	0.602794	0.542468	-0.501912	0.452322	0.245312	cyan	NBPF9
ENSG00000270069	-0.49208	-0.77981	-0.434778	0.0806096	0.180226	0.22052	0.702268	0.920112	0.420956	0.210153	0.362367	-0.373394	cyan	MIR222HG
ENSG00000270231	-0.534836	-0.389565	0.255373	0.726279	0.560908	-0.216229	0.545197	0.775746	0.564515	-0.297752	0.490395	0.0569982	cyan	NBPF8
ENSG00000270392	-0.76731	-0.84334	-0.400286	0.382484	0.320862	-0.0578199	0.590658	0.994189	0.571976	0.337127	0.640686	-0.151068	cyan	PFN1P2
ENSG00000271605	-0.615448	-0.936116	-0.483773	0.247191	0.481472	0.20966	0.63979	0.856283	0.443864	0.611026	0.426944	-0.416015	cyan	MILR1
ENSG00000272645	-0.745668	-0.605784	-0.212194	0.508366	0.394878	-0.266231	0.393961	0.923103	0.435889	0.0966524	0.717354	0.0991175	cyan	GTF2IP20
ENSG00000274512	-0.537732	-0.631746	-0.253644	0.281398	0.352413	0.0220397	0.576356	0.927723	0.351288	0.0254299	0.483399	-0.159836	cyan	TBC1D3L
ENSG00000274602	-0.947072	-0.689481	-0.360033	0.554269	0.299709	-0.45929	0.160596	0.836004	0.37596	0.431585	0.898657	0.260849	cyan	PI4KAP1
ENSG00000275714	-0.23413	-0.164332	-0.543304	-0.366159	-0.457929	-0.0988715	-0.0371249	0.441434	-0.0880272	-0.0152958	0.334752	0.128862	cyan	HIST1H3A
ENSG00000276427	-0.467474	-0.634552	-0.319516	0.189728	0.178291	0.122608	0.66615	0.850591	0.69705	0.0949794	0.362823	-0.273889	cyan	IGLL4P
ENSG00000278662	-0.709	-0.848486	-0.582936	0.135189	0.227978	-0.0136125	0.369589	0.866062	0.0610908	0.535276	0.608529	-0.14724	cyan	GOLGA6L10
ENSG00000282458	-0.63687	-0.639556	-0.0873898	0.527295	0.500971	-0.0941588	0.597619	0.942177	0.467174	-0.00780903	0.563322	-0.0811741	cyan	WASH5P
ENSG00000282508	-0.710051	-0.439747	0.107524	0.72514	0.47365	-0.397087	0.352533	0.808095	0.416635	-0.140247	0.694385	0.232438	cyan	LINC01002
ENSG00000004864	0.860054	0.722108	0.691694	-0.162738	0.130922	0.309765	-0.180199	-0.827862	-0.508116	-0.538196	-0.80304	-0.139932	brown	SLC25A13
ENSG00000011376	0.415354	0.201922	0.475341	0.0602335	0.416666	0.264355	-0.018999	-0.432629	-0.605062	-0.117412	-0.454819	-0.210847	brown	LARS2
ENSG00000015171	0.879091	0.877023	0.413677	-0.481933	-0.326575	0.195148	-0.386435	-0.81017	-0.494889	-0.632587	-0.713759	0.0429623	brown	ZMYND11
ENSG00000018510	0.977308	0.692058	0.319769	-0.625222	-0.256297	0.499977	-0.151667	-0.755681	-0.531305	-0.502345	-0.891493	-0.276965	brown	AGPS
ENSG00000023572	0.85133	0.150035	0.0525807	-0.649899	0.0666329	0.895654	0.307808	-0.415188	-0.401141	-0.0811611	-0.923294	-0.769476	brown	GLRX2
ENSG00000029153	0.904285	0.647997	0.70379	-0.165882	0.261482	0.469229	0.0825218	-0.612798	-0.360925	-0.699564	-0.850617	-0.305761	brown	ARNTL2
ENSG00000039560	0.911544	0.795957	0.551329	-0.334668	-0.0115488	0.324308	-0.197165	-0.743911	-0.444296	-0.65118	-0.787551	-0.114109	brown	RAI14
ENSG00000040275	0.733802	0.522704	-0.0303665	-0.70565	-0.49104	0.394484	-0.132778	-0.503935	-0.180945	-0.332776	-0.639738	-0.207295	brown	SPDL1
ENSG00000054598	0.981044	0.605876	0.484117	-0.449424	-0.0172113	0.604452	0.0984985	-0.64212	-0.358601	-0.598449	-0.94585	-0.420803	brown	FOXC1
ENSG00000065328	0.936666	0.318003	0.199431	-0.618656	0.0116182	0.83254	0.240496	-0.531948	-0.392458	-0.251134	-0.979397	-0.681456	brown	MCM10
ENSG00000067955	0.842535	0.633622	0.627137	-0.208722	0.0721636	0.4278	0.164977	-0.465576	-0.139868	-0.821941	-0.774037	-0.269813	brown	CBFB
ENSG00000068354	0.573516	0.585693	-0.223271	-0.777764	-0.706681	0.108002	-0.533512	-0.602589	-0.44315	-0.138048	-0.408628	0.104064	brown	TBC1D25
ENSG00000068654	0.977787	0.638827	0.554833	-0.384763	0.0210348	0.552907	0.0169342	-0.747064	-0.43047	-0.548901	-0.95162	-0.372748	brown	POLR1A
ENSG00000071564	0.677626	0.288291	0.237248	-0.421937	0.0293678	0.495141	-0.0789178	-0.600805	-0.783698	-0.0797124	-0.703837	-0.366005	brown	TCF3
ENSG00000073849	0.759285	0.639331	0.192968	-0.622533	-0.506098	0.251325	-0.387109	-0.782563	-0.708111	-0.333937	-0.669449	-0.0438896	brown	ST6GAL1
ENSG00000075340	0.822403	0.509835	0.778822	0.00354007	0.424806	0.503576	0.224909	-0.559656	-0.220709	-0.606625	-0.839601	-0.395162	brown	ADD2
ENSG00000075391	0.925452	0.583798	0.51808	-0.365208	-0.0329662	0.56642	0.164782	-0.594849	-0.157195	-0.62853	-0.908458	-0.407483	brown	RASAL2
ENSG00000076770	0.858958	0.783381	0.224069	-0.613814	-0.375315	0.263263	-0.396789	-0.776139	-0.531467	-0.461235	-0.702691	-0.0248907	brown	MBNL3
ENSG00000080345	0.810735	0.747392	0.524948	-0.290554	-0.258178	0.231663	-0.230074	-0.861066	-0.187764	-0.485639	-0.761178	-0.0673482	brown	RIF1
ENSG00000083307	0.69787	0.571441	0.526634	-0.182895	-0.0901015	0.247175	-0.19195	-0.817393	-0.339981	-0.299184	-0.705172	-0.124666	brown	GRHL2
ENSG00000083720	0.875495	0.279703	0.330692	-0.44481	0.0805829	0.812585	0.421952	-0.406025	-0.118062	-0.396985	-0.945509	-0.699435	brown	OXCT1
ENSG00000085415	0.937235	0.385145	0.161042	-0.663943	-0.126841	0.769374	0.167141	-0.573511	-0.315106	-0.270183	-0.958912	-0.606619	brown	SEH1L
ENSG00000085491	0.9807	0.664779	0.496916	-0.448295	-0.0672382	0.543263	0.0268019	-0.684573	-0.368588	-0.623797	-0.926319	-0.34979	brown	SLC25A24
ENSG00000085840	0.93148	0.452468	0.396145	-0.422839	0.160051	0.682802	0.0975462	-0.673805	-0.419763	-0.291672	-0.951038	-0.530763	brown	ORC1
ENSG00000087053	0.910244	0.72969	0.601101	-0.270389	0.0552002	0.403157	-0.0147614	-0.651154	-0.245463	-0.707267	-0.822427	-0.219502	brown	MTMR2
ENSG00000088205	0.930698	0.302344	0.240819	-0.583135	0.0780902	0.841228	0.277796	-0.486273	-0.448127	-0.300818	-0.971027	-0.691723	brown	DDX18
ENSG00000099250	0.500757	0.233084	0.124935	-0.407681	-0.398321	0.392073	0.223625	-0.23568	0.0445014	-0.384039	-0.529828	-0.310199	brown	NRP1
ENSG00000100304	0.790753	0.307552	-0.107278	-0.819085	-0.23967	0.65957	-9.2213e-05	-0.411686	-0.650985	-0.180326	-0.740504	-0.470522	brown	TTLL12
ENSG00000100605	0.927797	0.819443	0.384909	-0.54964	-0.36842	0.307395	-0.309445	-0.841793	-0.477322	-0.56683	-0.806776	-0.0773107	brown	ITPK1
ENSG00000100664	0.911152	0.288643	0.137094	-0.651765	0.0269895	0.831033	0.221668	-0.481959	-0.471164	-0.224484	-0.938616	-0.674552	brown	EIF5
ENSG00000100697	0.8975	0.687313	0.652119	-0.241226	0.0232959	0.429815	0.0918199	-0.595329	-0.200126	-0.782031	-0.836452	-0.261256	brown	DICER1
ENSG00000100916	0.852165	0.665853	0.105938	-0.678949	-0.424973	0.376071	-0.294325	-0.76325	-0.347613	-0.295445	-0.7538	-0.164627	brown	BRMS1L
ENSG00000101084	0.869162	0.382776	0.285069	-0.460937	0.164776	0.667693	0.0367184	-0.652719	-0.524595	-0.151299	-0.888597	-0.51962	brown	C20orf24
ENSG00000101868	0.616569	0.24533	-0.0490887	-0.592729	-0.157846	0.456118	-0.260409	-0.680078	-0.749492	0.232246	-0.63942	-0.323087	brown	POLA1
ENSG00000102109	0.26594	0.529673	-0.0503792	-0.328375	-0.384038	-0.261103	-0.837392	-0.736822	-0.640883	0.169704	-0.123744	0.407	brown	PCSK1N
ENSG00000102317	0.950289	0.517202	0.525864	-0.357636	0.0995302	0.660811	0.231473	-0.578241	-0.22825	-0.570712	-0.957059	-0.509565	brown	RBM3
ENSG00000102743	0.950735	0.627995	0.576985	-0.346861	0.119018	0.539182	0.0546265	-0.62781	-0.504823	-0.650968	-0.89372	-0.353245	brown	SLC25A15
ENSG00000102753	0.982562	0.567779	0.362717	-0.53091	-0.0333831	0.630868	-0.00540867	-0.743961	-0.438202	-0.369063	-0.963639	-0.446199	brown	KPNA3
ENSG00000104267	0.689615	0.0837311	-0.121017	-0.637609	0.0723644	0.76991	0.205124	-0.299559	-0.374191	0.0539852	-0.725079	-0.65384	brown	CA2
ENSG00000104320	0.881626	0.847988	0.376483	-0.51657	-0.42899	0.216958	-0.397476	-0.900376	-0.421172	-0.51178	-0.758706	0.00699223	brown	NBN
ENSG00000104356	0.901676	0.24078	0.217807	-0.575362	0.0338091	0.863998	0.327342	-0.489041	-0.348335	-0.228528	-0.980936	-0.736541	brown	POP1
ENSG00000104381	0.532231	0.416573	0.114274	-0.508312	-0.541948	0.233506	-0.0500011	-0.33505	-0.293234	-0.492542	-0.466297	-0.0894644	brown	GDAP1
ENSG00000104833	0.494632	0.503444	0.0223827	-0.485155	-0.37886	0.037096	-0.646629	-0.816742	-0.794624	0.107916	-0.412861	0.126782	brown	TUBB4A
ENSG00000105810	0.946602	0.643827	0.520295	-0.401186	-0.0220211	0.494703	-0.0955338	-0.812675	-0.550539	-0.460019	-0.916823	-0.310785	brown	CDK6
ENSG00000106443	0.562592	0.424565	0.273337	-0.306284	0.0606519	0.216991	-0.327892	-0.59119	-0.915586	-0.166808	-0.491018	-0.0645614	brown	PHF14
ENSG00000108061	0.874748	0.860668	0.430061	-0.458797	-0.242639	0.202947	-0.390773	-0.796944	-0.586328	-0.621621	-0.705852	0.0359277	brown	SHOC2
ENSG00000108518	0.866111	0.425268	0.173167	-0.597692	0.0183709	0.617361	-0.0823431	-0.641902	-0.705138	-0.172438	-0.835859	-0.435417	brown	PFN1
ENSG00000109586	0.454526	0.333614	0.438036	-0.0647459	-0.127363	0.195722	0.00605127	-0.529488	-0.0945453	-0.260723	-0.513694	-0.14239	brown	GALNT7
ENSG00000109971	0.877464	0.374668	0.21721	-0.546285	0.104915	0.685426	0.0212186	-0.622515	-0.615907	-0.158214	-0.881314	-0.522877	brown	HSPA8
ENSG00000110172	0.814262	0.116878	0.00986998	-0.662704	0.087495	0.885518	0.311471	-0.335633	-0.47231	-0.0930496	-0.869464	-0.756431	brown	CHORDC1
ENSG00000111371	0.808886	0.472468	0.574522	-0.183253	0.0695336	0.533595	0.259399	-0.550665	0.0567398	-0.53215	-0.851642	-0.431118	brown	SLC38A1
ENSG00000112186	0.917447	0.773941	0.548721	-0.39168	-0.120309	0.328031	-0.251589	-0.830234	-0.640387	-0.590247	-0.820283	-0.115571	brown	CAP2
ENSG00000112339	0.915576	0.780797	0.310657	-0.563843	-0.278975	0.329445	-0.355403	-0.859789	-0.513842	-0.421864	-0.795324	-0.101524	brown	HBS1L
ENSG00000113580	0.915054	0.873074	0.521001	-0.399764	-0.195894	0.232787	-0.370387	-0.895011	-0.535736	-0.589013	-0.781892	-0.00642715	brown	NR3C1
ENSG00000114331	0.884321	0.813976	0.593569	-0.268815	-0.0894718	0.28111	-0.150967	-0.753269	-0.183117	-0.68555	-0.7812	-0.0918405	brown	ACAP2
ENSG00000115232	0.740411	0.637635	0.711625	-0.0862247	0.0395666	0.247428	-0.0789905	-0.696015	-0.404364	-0.611311	-0.709303	-0.109975	brown	ITGA4
ENSG00000117226	0.864303	0.300972	0.352906	-0.433788	0.118197	0.784888	0.433677	-0.313627	-0.199858	-0.522977	-0.896705	-0.658028	brown	GBP3
ENSG00000118961	0.86853	0.638898	0.385371	-0.461441	0.000250469	0.405492	-0.227235	-0.706301	-0.776478	-0.44205	-0.766796	-0.195544	brown	LDAH
ENSG00000119326	0.877275	0.206295	0.313368	-0.446163	0.191411	0.877163	0.431622	-0.418064	-0.255259	-0.283191	-0.971005	-0.771371	brown	CTNNAL1
ENSG00000120658	0.79656	0.710139	0.184142	-0.556484	-0.43852	0.251856	-0.393493	-0.879	-0.262061	-0.231847	-0.713633	-0.0593137	brown	ENOX1
ENSG00000120800	0.913979	0.348279	0.373353	-0.457404	0.0715084	0.764023	0.245402	-0.596126	-0.359401	-0.303619	-0.982002	-0.633625	brown	UTP20
ENSG00000120992	0.900014	0.754575	0.491647	-0.349524	-0.0726468	0.357215	-0.152055	-0.762008	-0.229667	-0.553998	-0.81042	-0.167165	brown	LYPLA1
ENSG00000123144	0.659193	0.327271	0.0821301	-0.49074	-0.00949391	0.434196	-0.262733	-0.703948	-0.730674	0.129501	-0.659398	-0.293823	brown	C19orf43
ENSG00000123505	0.953021	0.497023	0.148461	-0.71903	-0.17612	0.664831	-0.0363955	-0.655794	-0.571912	-0.294531	-0.913361	-0.462436	brown	AMD1
ENSG00000125266	0.950817	0.542952	0.21245	-0.706149	-0.289545	0.6158	-0.0202223	-0.646524	-0.544909	-0.429707	-0.905758	-0.410243	brown	EFNB2
ENSG00000125484	0.908237	0.860665	0.48554	-0.437814	-0.315714	0.238806	-0.339963	-0.892782	-0.428056	-0.587598	-0.79101	-0.0190568	brown	GTF3C4
ENSG00000125534	0.901004	0.625516	0.301497	-0.521583	-0.0942834	0.454425	-0.260926	-0.855011	-0.58419	-0.232038	-0.846719	-0.258923	brown	PPDPF
ENSG00000125630	0.943903	0.465422	0.39965	-0.501611	0.0565224	0.686481	0.141438	-0.562154	-0.588307	-0.487693	-0.930818	-0.510367	brown	POLR1B
ENSG00000127314	0.942165	0.800141	0.535988	-0.377212	-0.0939083	0.341063	-0.259812	-0.88767	-0.464263	-0.523904	-0.852203	-0.134242	brown	RAP1B
ENSG00000128228	0.579421	0.258722	0.0262483	-0.48201	0.000510867	0.400881	-0.269897	-0.624801	-0.806304	0.170992	-0.576827	-0.269346	brown	SDF2L1
ENSG00000128641	0.852223	0.176896	0.201055	-0.528963	0.150558	0.888515	0.453614	-0.293341	-0.26938	-0.318826	-0.913795	-0.770462	brown	MYO1B
ENSG00000129317	0.899169	0.845548	0.387322	-0.491023	-0.2887	0.242863	-0.408169	-0.9008	-0.482031	-0.47865	-0.766406	-0.0149168	brown	PUS7L
ENSG00000130731	0.729936	0.245308	-0.0191669	-0.648591	-0.0840942	0.60832	-0.126674	-0.645673	-0.730347	0.144913	-0.758881	-0.463415	brown	C16orf13
ENSG00000131016	0.471702	0.314444	-0.0293711	-0.528007	-0.481482	0.203489	-0.363773	-0.681524	-0.578778	0.125706	-0.480563	-0.0842769	brown	AKAP12
ENSG00000134352	0.947068	0.771238	0.627488	-0.3153	-0.0172712	0.393431	-0.0738042	-0.723537	-0.392458	-0.731135	-0.855712	-0.194194	brown	IL6ST
ENSG00000134444	0.867527	0.678786	0.370797	-0.444294	-0.26635	0.371239	-0.208139	-0.872162	-0.222532	-0.330573	-0.834353	-0.198882	brown	KIAA1468
ENSG00000134954	0.87823	0.495956	0.55794	-0.284238	0.207187	0.603088	0.270047	-0.404631	-0.323437	-0.711778	-0.843389	-0.449386	brown	ETS1
ENSG00000134987	0.949489	0.830476	0.467589	-0.476736	-0.240699	0.324313	-0.281681	-0.851151	-0.485075	-0.593542	-0.831855	-0.0980238	brown	WDR36
ENSG00000135249	0.912753	0.750532	0.363834	-0.527375	-0.157666	0.355268	-0.303882	-0.778197	-0.66921	-0.499024	-0.782319	-0.124005	brown	RINT1
ENSG00000135272	0.843511	0.834533	0.622985	-0.212905	-0.0217561	0.214442	-0.178647	-0.68893	-0.246629	-0.758433	-0.70627	-0.0193904	brown	MDFIC
ENSG00000135763	0.869726	0.214712	0.155798	-0.615711	-0.0659882	0.849967	0.324406	-0.471584	-0.308497	-0.198715	-0.955443	-0.727086	brown	URB2
ENSG00000136628	0.793459	0.605914	0.615143	-0.148579	-0.0098781	0.362599	0.0131195	-0.739247	-0.0388861	-0.478868	-0.805641	-0.243315	brown	EPRS
ENSG00000137460	0.63641	0.398139	0.557206	-0.119073	0.0268144	0.356944	0.0844916	-0.557998	-0.308631	-0.414368	-0.6804	-0.267448	brown	FHDC1
ENSG00000138119	0.848374	0.275625	0.524842	-0.225648	0.396461	0.782718	0.467091	-0.359515	-0.210422	-0.478112	-0.914244	-0.684778	brown	MYOF
ENSG00000138698	0.84222	0.769426	0.40743	-0.397308	-0.13086	0.234507	-0.43529	-0.928596	-0.575444	-0.326663	-0.738327	-0.0296574	brown	RAP1GDS1
ENSG00000138777	0.578201	0.517703	0.0458498	-0.499321	-0.309636	0.133386	-0.587439	-0.860705	-0.703977	0.121654	-0.511847	0.0320133	brown	PPA2
ENSG00000138814	0.968465	0.733034	0.407109	-0.520492	-0.208677	0.439138	-0.216519	-0.875565	-0.467826	-0.439505	-0.901331	-0.230121	brown	PPP3CA
ENSG00000139514	0.744714	0.32821	0.642422	-0.0707322	0.263856	0.598731	0.434498	-0.384228	-0.0152432	-0.570043	-0.821128	-0.527336	brown	SLC7A1
ENSG00000139734	0.831963	0.570934	0.728557	-0.034068	0.317965	0.457405	0.141535	-0.643014	-0.0911812	-0.552773	-0.840252	-0.343154	brown	DIAPH3
ENSG00000140416	0.807691	0.345063	0.622212	-0.12075	0.332793	0.641786	0.322389	-0.532578	-0.203781	-0.414236	-0.890772	-0.556216	brown	TPM1
ENSG00000141971	-0.0159516	-0.0916976	-0.392538	-0.289756	-0.0661097	0.0216354	-0.41183	-0.283391	-0.498483	0.653149	0.00896007	0.00575211	brown	MVB12A
ENSG00000143157	0.926742	0.650534	0.59295	-0.329777	0.0394118	0.496484	0.0897147	-0.574868	-0.38629	-0.751229	-0.860243	-0.313239	brown	POGK
ENSG00000143476	0.917803	0.698723	0.696545	-0.186454	0.199496	0.42312	-0.0339929	-0.736733	-0.404868	-0.622893	-0.863433	-0.252081	brown	DTL
ENSG00000143756	0.977013	0.702656	0.379829	-0.54138	-0.194411	0.488669	-0.149435	-0.820405	-0.40919	-0.452513	-0.914033	-0.282482	brown	FBXO28
ENSG00000144354	0.959248	0.71728	0.399851	-0.539211	-0.148416	0.440119	-0.229802	-0.809195	-0.673772	-0.485455	-0.865744	-0.21674	brown	CDCA7
ENSG00000144366	0.924703	0.762298	0.37079	-0.544399	-0.370345	0.362204	-0.234516	-0.836393	-0.365888	-0.509924	-0.840236	-0.151156	brown	GULP1
ENSG00000144645	0.954338	0.620016	0.32491	-0.562037	-0.12042	0.560227	-0.017158	-0.638992	-0.391112	-0.514485	-0.882317	-0.3577	brown	OSBPL10
ENSG00000144681	0.908381	0.794363	0.583158	-0.34298	-0.188547	0.304617	-0.208035	-0.85288	-0.393192	-0.610929	-0.832263	-0.109686	brown	STAC
ENSG00000145391	0.89956	0.605614	0.712742	-0.13624	0.239206	0.507925	0.158837	-0.632004	-0.177372	-0.645759	-0.890051	-0.369159	brown	SETD7
ENSG00000149948	0.913426	0.352575	0.142834	-0.69143	-0.0593958	0.764179	0.137942	-0.492486	-0.612488	-0.308345	-0.90482	-0.58454	brown	HMGA2
ENSG00000150672	0.496646	0.20962	0.061758	-0.442083	-0.442502	0.404419	0.184146	-0.305042	0.0901398	-0.248055	-0.548055	-0.330292	brown	DLG2
ENSG00000151239	0.941084	0.462138	0.187609	-0.656428	-0.159233	0.702369	0.113912	-0.572359	-0.318058	-0.364995	-0.925934	-0.523612	brown	TWF1
ENSG00000151338	0.821394	0.717191	0.572258	-0.265276	0.00106336	0.311808	-0.0179215	-0.495792	-0.330269	-0.83701	-0.690753	-0.121148	brown	MIPOL1
ENSG00000151576	0.686242	0.477791	0.398741	-0.263817	-0.025924	0.409914	0.244774	-0.23859	0.0496039	-0.732232	-0.618348	-0.278255	brown	QTRTD1
ENSG00000152056	0.986825	0.627745	0.303059	-0.615862	-0.176256	0.57244	-0.110256	-0.781856	-0.505876	-0.38344	-0.936959	-0.36541	brown	AP1S3
ENSG00000152503	0.545245	0.414232	-0.0198487	-0.60798	-0.690966	0.247699	-0.130599	-0.465764	-0.142881	-0.285625	-0.506083	-0.10851	brown	TRIM36
ENSG00000152601	0.93936	0.804511	0.391209	-0.53965	-0.283991	0.343416	-0.265462	-0.790645	-0.489209	-0.594009	-0.810903	-0.111536	brown	MBNL1
ENSG00000153310	0.923642	0.32405	0.114723	-0.68085	-0.0611952	0.806758	0.160265	-0.56763	-0.416866	-0.170296	-0.956743	-0.64821	brown	FAM49B
ENSG00000154001	0.965243	0.726517	0.327916	-0.602362	-0.233503	0.442291	-0.252986	-0.823465	-0.605183	-0.448574	-0.867504	-0.214073	brown	PPP2R5E
ENSG00000154059	0.86643	0.830171	0.452486	-0.442576	-0.222281	0.230584	-0.29931	-0.706389	-0.561577	-0.706653	-0.699259	0.00327836	brown	IMPACT
ENSG00000154127	0.974778	0.542766	0.335769	-0.56252	-0.039161	0.65985	0.0810605	-0.607879	-0.431327	-0.482321	-0.935892	-0.469074	brown	UBASH3B
ENSG00000154310	0.831029	0.715228	0.133726	-0.716057	-0.603855	0.27771	-0.409377	-0.83128	-0.558417	-0.348049	-0.721863	-0.0512276	brown	TNIK
ENSG00000154845	0.914419	0.37767	0.3698	-0.470192	0.159379	0.754825	0.281361	-0.424538	-0.458698	-0.493985	-0.914101	-0.597671	brown	PPP4R1
ENSG00000155100	0.831603	0.343614	0.306538	-0.437829	0.0149844	0.710089	0.379916	-0.32974	-0.0343636	-0.511533	-0.849678	-0.584323	brown	OTUD6B
ENSG00000158716	0.3384	0.306824	-0.234121	-0.534819	-0.412735	0.0443483	-0.63106	-0.698881	-0.668967	0.394891	-0.289355	0.082125	brown	DUSP23
ENSG00000162302	0.884354	0.257544	0.272468	-0.53312	0.136724	0.828525	0.326882	-0.393703	-0.521257	-0.359552	-0.92225	-0.686458	brown	RPS6KA4
ENSG00000162368	0.976336	0.513391	0.337319	-0.547251	0.0200591	0.684581	0.0744996	-0.642356	-0.468482	-0.403266	-0.955083	-0.501005	brown	CMPK1
ENSG00000162408	0.868225	0.216716	-0.0173701	-0.752157	-0.103399	0.838181	0.15932	-0.524951	-0.486628	-0.0274658	-0.921127	-0.689844	brown	NOL9
ENSG00000162878	0.820222	0.651311	0.249244	-0.586235	-0.318655	0.309325	-0.407492	-0.854534	-0.813553	-0.271896	-0.734346	-0.0966888	brown	PKDCC
ENSG00000162894	0.716182	0.513717	0.172606	-0.418913	-0.0948079	0.381443	-0.106488	-0.577135	-0.0714891	-0.241014	-0.656583	-0.233002	brown	FCMR
ENSG00000163249	0.875508	0.634412	0.186197	-0.661074	-0.369656	0.4507	-0.105809	-0.587078	-0.367747	-0.528468	-0.769885	-0.237075	brown	CCNYL1
ENSG00000163283	0.455524	0.13499	0.0173765	-0.314983	-0.0123888	0.381383	-0.142514	-0.631348	-0.259938	0.37051	-0.549011	-0.328707	brown	ALPP
ENSG00000164125	0.876403	0.460095	0.681705	-0.136578	0.335422	0.626664	0.319078	-0.507613	-0.200859	-0.608169	-0.906543	-0.510404	brown	FAM198B
ENSG00000164134	0.921635	0.286397	0.2152	-0.609898	-0.0159623	0.843273	0.288892	-0.503042	-0.388538	-0.27558	-0.980388	-0.700881	brown	NAA15
ENSG00000164323	0.978307	0.637194	0.308542	-0.613214	-0.228826	0.563049	-0.0569149	-0.723222	-0.398018	-0.469936	-0.922044	-0.35775	brown	CFAP97
ENSG00000164379	0.915853	0.540432	0.637004	-0.258191	0.193104	0.583178	0.182414	-0.574339	-0.420206	-0.643666	-0.905833	-0.429449	brown	FOXQ1
ENSG00000164506	0.845566	0.852742	0.27718	-0.587566	-0.491192	0.17323	-0.452379	-0.826646	-0.492033	-0.532062	-0.680892	0.068059	brown	STXBP5
ENSG00000165097	0.897493	0.856131	0.609746	-0.274944	-0.0448925	0.234473	-0.305113	-0.867475	-0.439383	-0.607327	-0.778141	-0.0277498	brown	KDM1B
ENSG00000165644	0.015026	0.24994	-0.0710779	-0.0678633	-0.0739038	-0.286346	-0.670478	-0.494429	-0.500117	0.362721	0.063696	0.347854	brown	COMTD1
ENSG00000167258	0.938814	0.736654	0.513926	-0.411883	-0.14997	0.424756	-0.0433424	-0.685433	-0.289815	-0.696424	-0.853777	-0.226368	brown	CDK12
ENSG00000167526	0.545431	0.223726	-0.168477	-0.638637	-0.203268	0.391161	-0.342997	-0.62569	-0.806021	0.293565	-0.537868	-0.251588	brown	RPL13
ENSG00000167588	0.966655	0.531111	0.373904	-0.501276	0.0432892	0.643297	0.00313779	-0.731146	-0.506188	-0.333738	-0.955928	-0.464986	brown	GPD1
ENSG00000169851	0.367731	0.276205	0.345763	-0.122301	-0.244243	0.179955	0.182379	-0.180586	0.00941262	-0.538354	-0.374112	-0.120472	brown	PCDH7
ENSG00000169856	0.831394	0.722877	0.127426	-0.723063	-0.515002	0.282885	-0.383033	-0.711875	-0.650145	-0.459136	-0.677588	-0.0389604	brown	ONECUT1
ENSG00000173926	0.484126	0.409686	0.537578	0.0880657	0.431512	0.227151	0.184873	-0.105212	-0.0829203	-0.689148	-0.386729	-0.132139	brown	2017-03-03
ENSG00000174371	0.866815	0.218044	0.184628	-0.558809	0.10937	0.86497	0.399203	-0.328026	-0.284697	-0.320476	-0.912638	-0.735511	brown	EXO1
ENSG00000174428	0.713241	0.646726	0.445647	-0.241534	0.0403963	0.260087	-0.0402161	-0.404711	-0.209966	-0.713952	-0.572406	-0.0868775	brown	GTF2IRD2B
ENSG00000175315	0.682939	0.299428	0.628558	-0.0422655	0.411165	0.51873	0.23208	-0.451076	-0.475076	-0.409571	-0.738009	-0.4357	brown	CST6
ENSG00000175602	0.826817	0.649655	0.306932	-0.498735	-0.156646	0.321566	-0.397671	-0.876773	-0.778709	-0.231771	-0.748078	-0.118823	brown	CCDC85B
ENSG00000176697	0.902535	0.266193	0.201576	-0.586865	-0.0196454	0.843766	0.311224	-0.504872	-0.267048	-0.231344	-0.977199	-0.715034	brown	BDNF
ENSG00000177855	0.759989	0.534231	0.088036	-0.57041	-0.203996	0.36775	-0.370925	-0.829537	-0.524388	0.00676983	-0.708962	-0.190404	brown	CACYBPP2
ENSG00000178172	0.868798	0.380246	-0.0159266	-0.810686	-0.317858	0.690969	0.0683976	-0.471771	-0.461292	-0.291305	-0.834799	-0.5017	brown	SPINK6
ENSG00000178409	0.9103	0.428451	0.581256	-0.273595	0.258956	0.689864	0.286161	-0.530146	-0.367466	-0.534382	-0.942427	-0.557319	brown	BEND3
ENSG00000178741	0.653001	0.180568	-0.101879	-0.642727	-0.0959375	0.576321	-0.150711	-0.615429	-0.697093	0.258878	-0.691658	-0.447124	brown	COX5A
ENSG00000179431	0.738321	0.391052	0.507467	-0.255352	0.0883165	0.487587	0.0993718	-0.543973	-0.558312	-0.427778	-0.762791	-0.365175	brown	FJX1
ENSG00000180370	0.974421	0.633445	0.584848	-0.340961	0.10195	0.563466	0.068118	-0.688953	-0.387207	-0.600591	-0.940843	-0.386554	brown	PAK2
ENSG00000180530	0.813326	0.590517	0.757758	-0.0587938	0.162542	0.418368	0.19674	-0.554174	-0.0934252	-0.741219	-0.807158	-0.29733	brown	NRIP1
ENSG00000180773	0.810926	0.842811	0.609248	-0.175725	0.0274943	0.145433	-0.343046	-0.831635	-0.362703	-0.56537	-0.681556	0.0453625	brown	SLC36A4
ENSG00000181472	0.868603	0.197461	0.177895	-0.586118	0.00653723	0.879336	0.413306	-0.372386	-0.254217	-0.285468	-0.945058	-0.758889	brown	ZBTB2
ENSG00000182154	0.737146	0.701924	0.543507	-0.185188	0.13539	0.172734	-0.365848	-0.77896	-0.687016	-0.414813	-0.626558	0.008047	brown	MRPL41
ENSG00000182307	0.945889	0.364589	0.165226	-0.670902	-0.0967458	0.795337	0.173036	-0.578415	-0.390348	-0.250439	-0.974758	-0.63229	brown	C8orf33
ENSG00000183688	0.733543	0.285532	0.667814	-0.0449561	0.4434	0.622669	0.442882	-0.298784	-0.28529	-0.60274	-0.787352	-0.541389	brown	FAM101B
ENSG00000183742	0.83902	0.262386	0.531996	-0.229003	0.337368	0.776613	0.465606	-0.388172	-0.217652	-0.458923	-0.923347	-0.685188	brown	MACC1
ENSG00000184216	0.870917	0.188374	0.13446	-0.619063	0.104322	0.879452	0.311647	-0.400049	-0.507621	-0.195118	-0.925307	-0.742325	brown	IRAK1
ENSG00000184254	0.886923	0.485736	0.650913	-0.17788	0.365971	0.608674	0.233314	-0.5208	-0.379103	-0.594188	-0.885617	-0.471557	brown	ALDH1A3
ENSG00000184271	0.689183	0.429306	-0.0394452	-0.62695	-0.212211	0.434013	-0.105122	-0.4154	-0.313542	-0.241345	-0.592255	-0.258242	brown	POU6F1
ENSG00000184557	0.751051	0.502032	0.0553009	-0.729706	-0.49627	0.415483	-0.108489	-0.460275	-0.555119	-0.470911	-0.653197	-0.211931	brown	SOCS3
ENSG00000184900	0.910975	0.366627	0.122933	-0.658237	-0.0604594	0.738793	0.0450061	-0.656441	-0.473868	-0.105388	-0.934831	-0.575903	brown	SUMO3
ENSG00000184903	0.750907	0.379759	0.435722	-0.234188	0.19507	0.586518	0.38211	-0.245068	0.0406339	-0.628861	-0.737085	-0.474075	brown	IMMP2L
ENSG00000185130	0.798946	0.243923	-0.0524042	-0.702344	-0.038717	0.72881	0.045267	-0.504904	-0.517811	0.0107314	-0.810164	-0.575572	brown	HIST1H2BL
ENSG00000185418	0.797168	0.43881	0.57091	-0.197017	0.320929	0.516603	0.0629181	-0.586752	-0.634943	-0.412313	-0.798122	-0.381411	brown	TARSL2
ENSG00000185697	0.77015	0.34382	0.692103	-0.00706138	0.448506	0.628269	0.477148	-0.335899	0.0124872	-0.61829	-0.826698	-0.5538	brown	MYBL1
ENSG00000185760	0.861314	0.393563	0.375695	-0.466059	-0.0965536	0.660592	0.238363	-0.511662	-0.319551	-0.471166	-0.895883	-0.521876	brown	KCNQ5
ENSG00000186603	0.913812	0.596717	0.266988	-0.606258	-0.244621	0.489626	-0.234612	-0.865886	-0.631571	-0.235153	-0.881989	-0.293088	brown	HPDL
ENSG00000186777	0.811267	0.616933	0.149132	-0.68682	-0.570843	0.364815	-0.207499	-0.683262	-0.423071	-0.424021	-0.734615	-0.162534	brown	ZNF732
ENSG00000187098	0.669125	0.514462	0.52484	-0.0960617	0.0456663	0.349005	0.226318	-0.367334	0.276343	-0.662645	-0.640165	-0.248671	brown	MITF
ENSG00000187325	0.972478	0.69563	0.475595	-0.46182	-0.152494	0.487996	-0.0904785	-0.815322	-0.378756	-0.509189	-0.929426	-0.295425	brown	TAF9B
ENSG00000188211	0.804632	0.672894	0.639124	-0.177177	-0.049353	0.336931	0.0998339	-0.537245	-0.0245973	-0.7985	-0.744614	-0.188359	brown	NCR3LG1
ENSG00000188452	0.431825	0.0186753	0.198766	-0.259118	-0.00359071	0.477331	0.224548	-0.27524	-0.419992	-0.0889258	-0.537433	-0.434938	brown	CERKL
ENSG00000188483	0.804727	0.728974	0.278361	-0.545535	-0.326182	0.212985	-0.506519	-0.899394	-0.806649	-0.297746	-0.688624	0.00893322	brown	IER5L
ENSG00000189057	0.911122	0.802658	0.426664	-0.498985	-0.328331	0.288698	-0.349738	-0.91248	-0.549031	-0.488772	-0.813312	-0.0696845	brown	FAM111B
ENSG00000196636	0.468048	0.366271	-0.294509	-0.701362	-0.521935	0.225794	-0.244812	-0.296086	-0.217159	-0.132258	-0.339551	-0.0616385	brown	SDHAF3
ENSG00000196747	0.517693	0.496678	-0.0439922	-0.50163	-0.218533	0.102151	-0.575988	-0.683444	-0.691506	0.0688788	-0.39485	0.072854	brown	HIST1H2AI
ENSG00000196850	0.844628	0.270753	0.0510803	-0.725975	-0.190841	0.776959	0.262537	-0.343514	-0.401381	-0.345564	-0.850851	-0.617144	brown	PPTC7
ENSG00000196935	0.913463	0.404149	0.378241	-0.466172	0.144857	0.728929	0.261676	-0.425336	-0.454068	-0.524468	-0.901009	-0.566928	brown	SRGAP1
ENSG00000197530	0.788962	0.511244	0.314573	-0.419197	0.0608111	0.418759	-0.249036	-0.757778	-0.763183	-0.169736	-0.745842	-0.245879	brown	MIB2
ENSG00000197601	0.928696	0.658467	0.271995	-0.629473	-0.305685	0.487707	-0.0837833	-0.639553	-0.406418	-0.558619	-0.835202	-0.272513	brown	FAR1
ENSG00000198142	0.77676	0.23315	0.142631	-0.587152	-0.139441	0.741972	0.385182	-0.237474	-0.218999	-0.447501	-0.800806	-0.6122	brown	SOWAHC
ENSG00000198435	0.838668	0.751387	0.368433	-0.461875	-0.165712	0.285859	-0.230806	-0.615568	-0.490784	-0.645274	-0.678431	-0.0628233	brown	NRARP
ENSG00000198586	0.880747	0.854265	0.596837	-0.283846	-0.0349894	0.224426	-0.276914	-0.771922	-0.469211	-0.695541	-0.734777	-0.00952831	brown	TLK1
ENSG00000198796	0.750102	0.352639	0.690775	-0.0408519	0.330468	0.567369	0.355347	-0.444271	-0.193021	-0.548563	-0.817919	-0.487822	brown	ALPK2
ENSG00000204175	0.892533	0.838952	0.614247	-0.284853	-0.0371302	0.259868	-0.203801	-0.72525	-0.427463	-0.754454	-0.753076	-0.0479651	brown	GPRIN2
ENSG00000206530	0.622024	0.264782	0.524826	0.0500635	0.52287	0.520083	0.314481	-0.378222	0.109344	-0.274017	-0.685368	-0.474662	brown	CFAP44
ENSG00000207652	0.338197	0.165412	0.179943	-0.243672	-0.298503	0.220838	0.0497944	-0.304847	-0.245989	-0.204728	-0.386838	-0.166618	brown	MIR621
ENSG00000212769	0.715644	0.362409	0.142882	-0.432706	-0.135532	0.523341	0.0551423	-0.598433	0.0835941	-0.0821742	-0.756155	-0.418694	brown	HMGN2P8
ENSG00000221869	0.903219	0.758569	0.431976	-0.482207	-0.188971	0.318149	-0.345422	-0.86692	-0.730093	-0.46905	-0.797881	-0.0959191	brown	CEBPD
ENSG00000224861	0.767235	0.140643	-0.09826	-0.7243	-0.0528727	0.816158	0.266344	-0.277504	-0.363532	-0.114184	-0.788572	-0.678449	brown	YBX1P1
ENSG00000227954	0.43644	0.30468	0.416242	-0.0993695	-0.0939317	0.192936	-0.0248393	-0.475496	-0.34948	-0.28017	-0.474553	-0.125587	brown	TARID
ENSG00000229468	0.338197	0.165412	0.179943	-0.243672	-0.298503	0.220838	0.0497944	-0.304847	-0.245989	-0.204728	-0.386838	-0.166618	brown	RPL39P18
ENSG00000229932	0.88252	0.403285	0.224727	-0.601275	-0.245511	0.673812	0.142147	-0.608283	-0.266599	-0.309614	-0.920515	-0.525459	brown	YWHAZP3
ENSG00000230756	0.495834	0.438636	-0.00211559	-0.401736	-0.368299	0.191519	-0.158172	-0.474186	0.228579	-0.140564	-0.441887	-0.0801982	brown	RHOQP3
ENSG00000231131	0.908358	0.582914	0.380632	-0.496564	-0.136618	0.551348	0.113511	-0.511556	-0.272848	-0.652493	-0.845679	-0.366437	brown	LINC01468
ENSG00000232024	0.728052	0.353912	-0.10635	-0.780394	-0.465472	0.55772	0.0613883	-0.350843	-0.239385	-0.311332	-0.677308	-0.387068	brown	LSM12P1
ENSG00000232060	0.353304	0.220841	-0.375422	-0.675427	-0.679448	0.165441	-0.449779	-0.639794	-0.296885	0.42511	-0.36192	-0.0616811	brown	SLC4A1APP1
ENSG00000233493	0.423758	0.38648	0.0899763	-0.326147	-0.13699	0.0675248	-0.535231	-0.727374	-0.767796	0.165208	-0.378535	0.0582818	brown	TMEM238
ENSG00000238113	0.655895	0.34049	-0.147533	-0.725098	-0.487092	0.48747	0.0286847	-0.356987	-0.052081	-0.222775	-0.612853	-0.337092	brown	LINC01410
ENSG00000238266	0.792069	0.109478	-0.0148488	-0.708932	-0.06211	0.87506	0.386801	-0.231114	-0.397105	-0.226996	-0.838929	-0.744246	brown	LINC00707
ENSG00000239528	0.80321	0.281641	0.516107	-0.208133	0.428519	0.727108	0.450819	-0.262191	-0.287477	-0.559502	-0.830289	-0.619872	brown	RPS14P8
ENSG00000240972	0.579393	0.353082	0.0203887	-0.485147	-0.0995949	0.304943	-0.397215	-0.729337	-0.73354	0.191605	-0.556444	-0.163486	brown	MIF
ENSG00000241978	0.78737	0.482243	0.691314	-0.0370894	0.24586	0.49844	0.272954	-0.547068	0.0699983	-0.560205	-0.831002	-0.40924	brown	AKAP2
ENSG00000244086	0.73868	0.453284	0.23239	-0.512438	-0.409877	0.450204	0.0540459	-0.550373	-0.138215	-0.404563	-0.743122	-0.31184	brown	RPS20P35
ENSG00000244573	0.456448	0.204539	-0.371036	-0.802906	-0.435325	0.352375	-0.183006	-0.181533	-0.659046	-0.073099	-0.343813	-0.18194	brown	RPL30P11
ENSG00000247626	0.797414	0.302953	0.0224592	-0.760185	-0.350384	0.661631	0.0916564	-0.452432	-0.57236	-0.271594	-0.798882	-0.494001	brown	MARS2
ENSG00000250312	0.727845	0.334608	0.539202	-0.11338	0.221818	0.544697	0.203915	-0.616992	-0.101981	-0.240644	-0.826077	-0.475637	brown	ZNF718
ENSG00000251669	0.87835	0.545653	0.265929	-0.537926	-0.184053	0.555224	0.0852744	-0.531419	-0.142322	-0.505002	-0.828506	-0.380843	brown	FAM86EP
ENSG00000254093	0.814422	0.219902	-0.155783	-0.834406	-0.227817	0.777537	0.0965919	-0.461266	-0.448421	-0.011182	-0.831459	-0.618109	brown	PINX1
ENSG00000269743	0.51669	0.200451	-0.233338	-0.614439	-0.134609	0.449369	-0.0519701	-0.250992	-0.296677	0.00843615	-0.455327	-0.316423	brown	SLC25A53
ENSG00000277443	0.827124	0.762236	0.575007	-0.280723	-0.0627462	0.21598	-0.35145	-0.877385	-0.669836	-0.486964	-0.735668	-0.0217223	brown	MARCKS
ENSG00000004779	0.536598	-0.019219	-0.096902	-0.469443	0.126098	0.64517	0.0627455	-0.462748	-0.42857	0.387044	-0.646986	-0.58319	blue	NDUFAB1
ENSG00000006327	0.45272	-0.346215	0.074175	-0.26	0.390488	0.925666	0.842102	0.176936	-0.0049024	-0.0653808	-0.646907	-0.945851	blue	TNFRSF12A
ENSG00000008513	0.642256	-0.0234924	0.349226	-0.22669	0.307204	0.822157	0.648401	-0.13106	-0.122006	-0.303633	-0.788762	-0.788503	blue	ST3GAL1
ENSG00000013275	0.542511	-0.305843	-0.0775909	-0.449879	0.328739	0.974823	0.630767	-0.0354441	-0.235947	0.186338	-0.728251	-0.960594	blue	PSMC4
ENSG00000019549	0.606453	0.228699	0.505112	-0.0947085	0.187951	0.554616	0.553744	-0.0779836	0.108068	-0.690753	-0.647307	-0.493165	blue	SNAI2
ENSG00000023909	0.796243	0.0876476	0.305931	-0.361299	0.381727	0.89511	0.493638	-0.300183	-0.339521	-0.219776	-0.902176	-0.811792	blue	GCLM
ENSG00000034510	0.211747	-0.536567	-0.350986	-0.395125	0.264691	0.835251	0.763546	0.4234	0.08259	0.206395	-0.370013	-0.871785	blue	TMSB10
ENSG00000035141	0.772651	-0.00619558	0.0119784	-0.60207	0.147469	0.960982	0.464697	-0.267366	-0.312326	-0.026621	-0.886422	-0.870997	blue	FAM136A
ENSG00000037474	0.619697	-0.169384	0.066556	-0.411265	0.259742	0.959058	0.735704	0.0127359	-0.010492	-0.132423	-0.773408	-0.929248	blue	NSUN2
ENSG00000039139	0.475179	-0.186941	0.403979	0.0602547	0.647453	0.790846	0.770243	-0.00638094	0.135956	-0.143968	-0.672487	-0.828973	blue	DNAH5
ENSG00000041982	0.667591	0.0952808	0.376301	-0.271763	0.188512	0.726045	0.508859	-0.203119	-0.273932	-0.399123	-0.768031	-0.659876	blue	TNC
ENSG00000046604	0.245562	-0.327397	0.354167	0.167937	0.56007	0.653023	0.854151	0.2359	0.242185	-0.192633	-0.451791	-0.734343	blue	DSG2
ENSG00000050405	0.597284	-0.211401	-0.00277759	-0.443753	0.191854	0.953073	0.643244	-0.12114	-0.0361754	0.0911122	-0.791827	-0.937188	blue	LIMA1
ENSG00000052749	0.215415	-0.62011	-0.273285	-0.34435	0.32276	0.901454	0.824876	0.36604	-0.0234979	0.286188	-0.438134	-0.962518	blue	RRP12
ENSG00000055044	0.297434	-0.526441	-0.260278	-0.400078	0.225614	0.920389	0.828558	0.310802	0.120069	0.203773	-0.506706	-0.964489	blue	NOP58
ENSG00000065268	0.278748	-0.151407	-0.402229	-0.572536	-0.22803	0.439806	-0.126075	-0.400315	-0.459784	0.645375	-0.39094	-0.400788	blue	WDR18
ENSG00000065548	0.700659	-0.120241	-0.0525798	-0.601696	0.148588	0.987967	0.549395	-0.152547	-0.291997	0.0152855	-0.836675	-0.919017	blue	ZC3H15
ENSG00000067334	0.489106	-0.281656	0.0604047	-0.277276	0.29876	0.909584	0.792431	0.0580637	0.195099	-0.00450099	-0.693626	-0.93098	blue	DNTTIP2
ENSG00000067798	0.658371	0.00167392	0.0378654	-0.541211	-0.0693972	0.784277	0.328207	-0.381396	-0.324911	0.049595	-0.801344	-0.716327	blue	NAV3
ENSG00000069399	0.484099	-0.249756	-0.26564	-0.622645	0.0932969	0.866443	0.547902	0.149302	-0.307934	0.0168598	-0.568507	-0.807492	blue	BCL3
[truncated: 275 more rows]
